# Supplementary material for: Eco-friendly, in-water, and catalyst-free assembly of acylethenylpyrroloimidazoindoles from 3H-indoles and acylpyrrolylacetylenes
Source: Royal Society of Chemistry journal article supplement (doi:10.1039/d3nj05049a), 2023-11-17
Supplement: d3nj05049a1.pdf [file d3nj05049a1.pdf]

## Supporting information

### Eco-friendly, in water, catalyst-free assembly of acylethenylpyrroloimidazoindoles from 3*H*-indoles acylpyrrolylacetylenes

Ludmila A. Oparina, Kseniya V. Belyaeva, Nikita A. Kolyvanov, Igor A. Ushakov, Denis N. Tomilin, Lyubov N. Sobenina, Anton V. Kuzmin, Boris A. Trofimov\*

A. E. Favorsky Irkutsk Institute of Chemistry, Siberian Branch, Russian Academy of Sciences, 1 Favorsky Str., 664033 Irkutsk, Russia

#### Contents

|   |                                                                                         |     |
|---|-----------------------------------------------------------------------------------------|-----|
| 1 | General information                                                                     | S2  |
| 2 | The structure of 3 <i>H</i> -indoles <b>1</b> and acylpyrrolylacetylenes <b>2</b>       | S2  |
| 3 | General procedure of pyrrolo[1',2':3,4]imidazo[1,2- <i>a</i> ]indole <b>3</b> synthesis | S3  |
| 4 | Characterization data of products                                                       | S4  |
| 5 | NMR spectra for products                                                                | S15 |
| 6 | Computational details                                                                   | S40 |
| 8 | References                                                                              | S66 |

## 1. General Information

NMR spectra were recorded from solutions in CDCl<sub>3</sub> on Bruker DPX-400 and AV-400 spectrometers (400.1 MHz for <sup>1</sup>H, 100.6 MHz for <sup>13</sup>C, 376.5 MHz for <sup>19</sup>F, and 40.5 MHz for <sup>15</sup>N). Chemical shifts ( $\delta$ ) are quoted in parts per million (ppm). The residual solvent peak,  $\delta_{\text{H}}$  7.27 and  $\delta_{\text{C}}$  77.10, was used as a reference. CFCl<sub>3</sub> was employed as external standard for <sup>19</sup>N NMR. Coupling constants ( $J$ ) are reported in Hertz (Hz). The multiplicity abbreviations used are: s singlet, d doublet, dd doublet of doublet, t triplet, m multiplet, nr narrow, br broad signal. The values of the  $\delta$  <sup>15</sup>N were measured through the 2D <sup>1</sup>H-<sup>15</sup>N HMBC experiment. The <sup>15</sup>N chemical shifts were referenced to CH<sub>3</sub>NO<sub>2</sub>.

IR spectra were obtained on a Varian 3100 IF-IR spectrometer (400-4000 cm<sup>-1</sup>) as thin films dispersed from CDCl<sub>3</sub>. Mass spectra of synthesized compounds were recorded on a GCMS-QP5050A spectrometer made by Shimadzu Company. High-resolution mass spectra were recorded from acetonitrile solution with 0.1% HFBA on HPLC Agilent 1200/Agilent 6210 TOF instrument equipped with an electrospray ionization (ESI) source. Melting points (uncorrected) were measured on a melting point apparatus SGW-X-4. Thin layer chromatography was carried out on Merck silica gel 60 F254 pre-coated aluminium foil sheets and were visualized using UV light (254 nm). Column chromatography was carried out using slurry packed Alfa Aesar silica gel (SiO<sub>2</sub>), 70-230 mesh, pore size 60 Å.

## 2. The structure of 3H-indoles 1 and acylpyrrolylacetylenes 2

### 3H-Indoles 1

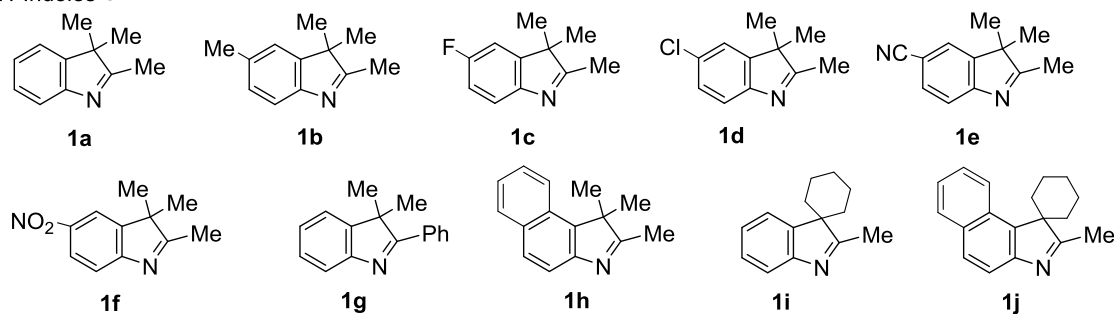

### Acylpyrrolylacetylenes 2

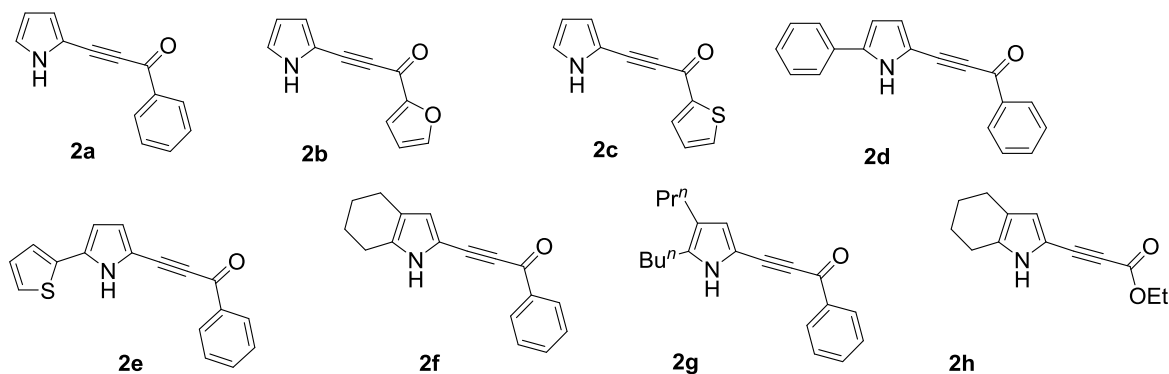

3H-Indoles **1a** and **1h** were purchased from commercial sources (Alfa Aesar), and were used without further purification. 3H-Indoles **1b-d,g-j** were prepared from corresponding aryl hydrazine hydrochlorides and ketones according to the literature procedures<sup>1-3</sup> and their characterization data were in accordance with the published ones.

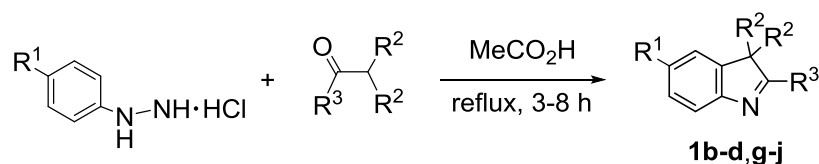

3*H*-Indoles **1e** and **1f** were prepared from 5-cyano hydrazine hydrochloride and 5-nitro hydrazine and 3-methyl-2-butanone in two steps. Their characterization data were in accordance with the published ones.<sup>4,5</sup>

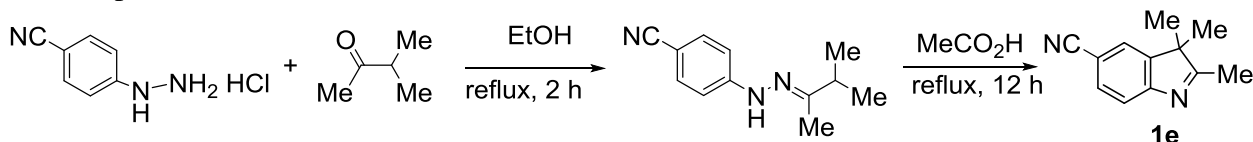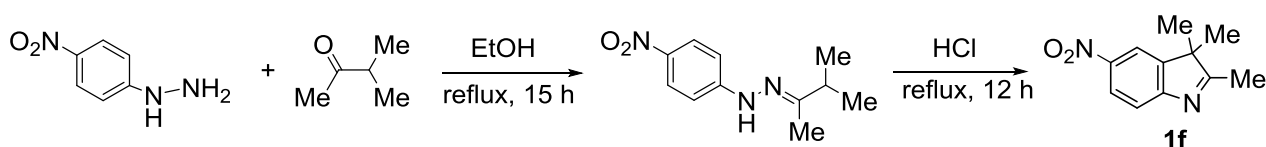

Starting acylpyrrolylacetylenes **2a-h** were obtained from corresponding pyrroles and acylbromoacetylenes in the presence of  $\text{Al}_2\text{O}_3$ . Pyrrole (5.0 mmol) and 1-acyl-2-bromoacetylene (5.0 mmol) were ground together at rt with 10-fold amount of  $\text{Al}_2\text{O}_3$  (chromatography grade, Merck, pH 6.8–7.8) in a porcelain mortar for 1–2 min. After 3 h, the reaction mixture were chromatographed on a column ( $\text{Al}_2\text{O}_3$ , eluent *n*-hexane– $\text{Et}_2\text{O}$ , gradient 9:1→0:1) to yield acylpyrrolylacetylene **2**.<sup>6</sup>

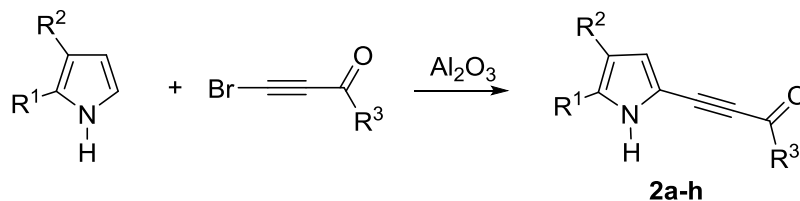

### 3. General procedure of pyrrolo[1',2':3,4]imidazo[1,2-*a*]indole 3 synthesis

**Procedure A:** To a 4.0 mL vial equipped with a magnetic stirrer, 3*H*-indole **1a-h** (0.5 mmol) and solution of acylpyrrolylacetylene **2a-f** (0.5 mmol) in MeCN (2 ml) added at room temperature. The vial was sealed with a screw-top septum cap and placed in a pre-heated oil bath at 80 °C for 96 h. After cooling down to ambient temperature, the solvent was removed under reduced pressure and residue was purified by column chromatography on silica gel (eluent: hexane/ $\text{Et}_2\text{O}$ , 1:0→0:1, v/v) to give target adduct **3a-o**.

**Procedure B:** A 5 ml round bottomed flask equipped with a magnetic stirrer, was charged 3*H*-indole **1a-j** (0.5 mmol), acetylene **2a-h** (0.5 mmol) and  $\text{H}_2\text{O}$  (1 mL). After stirring for ~10 min (~200  $\text{min}^{-1}$ ) at rt, the sealed reaction flask was placed in a pre-heated oil bath at 100 °C for 8 h. After cooling down to ambient temperature, water was decanted and solid residue was dissolved in  $\text{CH}_2\text{Cl}_2$  and dried over  $\text{Na}_2\text{SO}_4$ . The solvent was removed under reduced pressure and residue was purified by column chromatography ( $\text{SiO}_2$ , hexane/ $\text{Et}_2\text{O}$ , 1:0→0:1, v/v) to give target adduct **3a-w**.

#### 4. Characterization data of products

##### (*E*)-1-Phenyl-2-(4a,5,5-trimethyl-4a,5-dihydro-11*H*-pyrrolo[1',2':3,4]imidazo[1,2-*a*]indol-11-ylidene)ethan-1-one (3a).

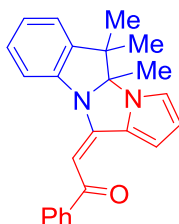

Obtained from 3*H*-indole **1a** (80 mg, 0.5 mmol) and pyrrolylacetylene **2a** (98 mg, 0.5 mmol). Yellow solid: 120 mg (yield 68% – procedure A), 148 mg (yield 83% – procedure B); mp 160–162 °C (hexane); <sup>1</sup>H NMR (400.1 MHz, CDCl<sub>3</sub>) δ 8.00–7.98 (m, 2 H, H<sub>o</sub>), 7.84 (dd, *J* = 3.9, 1.1 Hz, 1 H, H-1), 7.49–7.43 (m, 3 H, H<sub>*m,p*</sub>), 7.41–7.40 (m, 2 H, H-8, H-9), 7.23–7.19 (m, 2 H, H-6, H-7), 7.01 (dd, *J* = 2.6, 1.1 Hz, 1 H, H-3), 6.74 (s, 1 H, =CH), 6.55 (dd, *J* = 3.9, 2.6 Hz, 1 H, H-2), 1.64 (s, 3 H, Me-4a), 1.58 (s, 3 H, Me-5), 0.78 (s, 3 H, Me-5) ppm; <sup>13</sup>C NMR (100.6 MHz, CDCl<sub>3</sub>) δ 188.0 (C=O), 148.9 (C-11), 144.8 (C-5a), 141.2 (C<sub>*i*</sub>), 140.3 (C-9a), 133.0 (C-11a), 131.0 (C<sub>*p*</sub>), 128.3 (C<sub>*m*</sub>; C-8), 127.6 (C<sub>*o*</sub>), 125.0 (C-7), 123.0 (C-6), 117.4 (C-9), 116.5 (C-3), 115.1 (C-2), 112.8 (C-1), 91.5 (C-4a), 89.6 (=CH), 47.7 (C-5), 26.1 (Me-5), 23.9 (Me-4a), 19.9 (Me-5) ppm; <sup>15</sup>N NMR (40.6 MHz, CDCl<sub>3</sub>) δ –197.3 (N-4), –241.2 (N-10) ppm; IR (film): *ν* = 1640 (C=O), 1534 (C=C) cm<sup>-1</sup>; MS (EI) *m/z*: 354 (27) [M]<sup>+</sup>, 249 (100) [M – PhCO]<sup>+</sup>, 234 (83) [249 – Me]<sup>+</sup>, 233 (17), 105 (27) [PhCO]<sup>+</sup>, 77 (28) [Ph]<sup>+</sup>; HRMS (ESI-TOF) *m/z* [M+H]<sup>+</sup> calcd for C<sub>24</sub>H<sub>23</sub>N<sub>2</sub>O<sup>+</sup>: 355.1810, found: 355.1813.

##### (*E*)-1-Phenyl-2-(4a,5,5,7-tetramethyl-4a,5-dihydro-11*H*-pyrrolo[1',2':3,4]imidazo[1,2-*a*]indol-11-ylidene)ethan-1-one (3b).

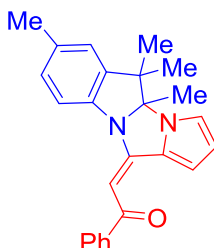

Obtained from 3*H*-indole **1b** (87 mg, 0.5 mmol) and pyrrolylacetylene **2a** (98 mg, 0.5 mmol). Light yellow solid; 107 mg (yield 58 % – procedure A), 140 mg (yield 76 % – procedure B); mp 193–194 °C (hexane); <sup>1</sup>H NMR (400.1 MHz, CDCl<sub>3</sub>) δ 7.99–7.97 (m, 2 H, H<sub>o</sub>), 7.83 (dd, *J* = 3.6, 1.0 Hz, 1 H, H-1), 7.49–7.43 (m, 3 H, H<sub>*m,p*</sub>), 7.30 (d, 1 H, *J* 8.0 Hz, H-9), 7.20 (d, 1 H, *J* 8.0 Hz, H-8), 7.02 (s, 1 H, H-6), 7.00 (dd, *J* = 2.7, 1.0 Hz, 1 H, H-3), 6.69 (s, 1 H, =CH), 6.55 (dd, *J* = 3.6, 2.7 Hz, 1 H, H-2), 2.40 (s, 3 H, Me-7), 1.64 (s, 3 H, Me-4a), 1.56 (s, 3 H, Me-5), 0.77 (s, 3 H, Me-5) ppm; <sup>13</sup>C NMR (100.6 MHz, CDCl<sub>3</sub>) δ 187.9 (C=O), 149.2 (C-11), 144.9 (C-5a), 141.4 (C<sub>*i*</sub>), 138.0 (C-9a), 134.9 (C-11a), 133.1 (C-7), 130.9 (C<sub>*p*</sub>), 128.7 (C-8), 128.3 (C<sub>*m*</sub>), 127.6 (C<sub>*o*</sub>), 123.8 (C-6), 117.2 (C-9), 116.3 (C-3), 115.0 (C-2), 112.7 (C-1), 91.6 (C-4a), 89.5 (=CH), 47.8 (C-5), 26.1 (Me-5), 23.9 (Me-4a), 21.2 (Me-7), 19.9 (Me-5) ppm; IR (film): *ν* = 1640 (C=O), 1535 (C=C) cm<sup>-1</sup>; MS (EI) *m/z*: 368 (18) [M]<sup>+</sup>, 263 (100) [M – PhCO]<sup>+</sup>, 248 (94) [263 – Me]<sup>+</sup>, 115 (21), 105 (51) [PhCO]<sup>+</sup>, 91 (18), 77 (66) [Ph]<sup>+</sup>, 51 (19), 41 (13); HRMS (ESI-TOF) *m/z* [M+H]<sup>+</sup> calcd for C<sub>25</sub>H<sub>25</sub>N<sub>2</sub>O<sup>+</sup>: 369.1967, found: 369.1969.

##### (*E*)-2-(7-Fluoro-4a,5,5-trimethyl-4a,5-dihydro-11*H*-pyrrolo[1',2':3,4]imidazo[1,2-*a*]indol-11-ylidene)-1-phenylethan-1-one (3c).

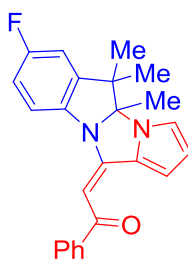

Obtained from 3*H*-indole **1c** (89 mg, 0.5 mmol) and pyrrolylacetylene **2a** (98 mg, 0.5 mmol). Yellow solid; 67 mg (yield 36% – procedure A), 104 mg (yield 56% – procedure B); mp 208–209 °C (CHCl<sub>3</sub>/hexane); <sup>1</sup>H NMR (400.1 MHz, CDCl<sub>3</sub>) δ 7.98–7.96 (m, 2 H, H<sub>o</sub>), 7.83 (dd, *J* = 3.6, 1.0 Hz, 1 H, H-1), 7.49–7.44 (m, 3 H, H<sub>m,p</sub>), 7.34 (dd, *J* = 8.6, 4.3 Hz, 1 H, H-9), 7.08 (ddd, *J* = 8.6, 8.0, 2.5 Hz, 1 H, H-8), 7.00 (dd, *J* = 2.7, 1.0 Hz, 1 H, H-3), 6.93 (dd, *J* = 8.0, 2.5 Hz, 1 H, H-6), 6.65 (s, 1 H, =CH), 6.55 (dd, *J* = 3.6, 2.7 Hz, 1 H, H-2), 1.65 (s, 3 H, Me-4a), 1.56 (s, 3 H, Me-5), 0.78 (s, 3 H, Me-5) ppm; <sup>13</sup>C NMR (100.6 MHz, CDCl<sub>3</sub>): δ 188.1 (C=O), 160.5 (d, *J* = 244.8 Hz, C-7), 149.1 (C-11), 147.1 (d, *J* = 7.5 Hz, C-5a), 141.2 (C<sub>i</sub>), 136.6 (C-9a), 132.9 (C-11a), 131.2 (C<sub>p</sub>), 128.4 (C<sub>m</sub>), 127.6 (C<sub>o</sub>), 118.4 (d, *J* 8.5 Hz, C-9), 116.4 (C-3), 115.3 (C-2), 114.7 (d, *J* 23.6 Hz, C-8), 113.0 (C-1), 111.0 (d, *J* 24.0 Hz, C-6), 91.8 (C-4a), 89.6 (=CH), 48.3 (C-5), 26.0 (Me-5), 23.8 (Me-4a), 19.9 (Me-5) ppm; <sup>15</sup>N NMR (40.6 MHz, CDCl<sub>3</sub>): δ –243.7 (N-10), –198.5 (N-4) ppm; <sup>19</sup>F NMR (376.5 MHz, CDCl<sub>3</sub>): δ –116.79 ppm; IR (film): ν = 1641 (C=O), 1538 (C=C) cm<sup>-1</sup>; MS (EI) *m/z*: 372 (10) [M]<sup>+</sup>, 267 (83) [M – PhCO]<sup>+</sup>, 252 (88) [267 – Me]<sup>+</sup>, 162 (14), 133 (16), 105 (82) [PhCO]<sup>+</sup>, 77 (100) [Ph]<sup>+</sup>, 51 (31), 39 (20); HRMS (ESI-TOF) *m/z* [M+H]<sup>+</sup> calcd for C<sub>24</sub>H<sub>22</sub>FN<sub>2</sub>O<sup>+</sup>: 373.1716, found: 373.1717.

**(E)-2-(7-Chloro-4a,5,5-trimethyl-4a,5-dihydro-11H-pyrrolo[1',2':3,4]imidazo[1,2-a]indol-11-ylidene)-1-phenylethan-1-one (3d).**

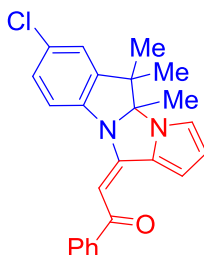

Obtained from 3*H*-indole **1d** (97 mg, 0.5 mmol) and pyrrolylacetylene **2a** (98 mg, 0.5 mmol). Light yellow solid; 68 mg (yield 35% – procedure A), 111 mg (yield 57% – procedure B); mp 160–161 °C (CHCl<sub>3</sub>/hexane); <sup>1</sup>H NMR (400.1 MHz, CDCl<sub>3</sub>) δ 7.98–7.96 (m, 2 H, H<sub>o</sub>), 7.83 (dd, *J* = 3.8, 1.0 Hz, 1 H, H-1), 7.50–7.44 (m, 3 H, H<sub>m,p</sub>), 7.37 (dd, *J* = 8.3, 2.0 Hz, 1 H, H-8), 7.32 (d, *J* = 8.3 Hz, 1 H, H-9), 7.17 (d, *J* = 2.0 Hz, 1 H, H-6), 6.99 (dd, *J* = 2.5, 1.0 Hz, 1 H, H-3), 6.65 (s, 1 H, =CH), 6.55 (dd, *J* = 3.8, 2.5 Hz, 1 H, H-2), 1.64 (s, 3 H, Me-4a), 1.56 (s, 3 H, Me-5), 0.79 (s, 3 H, Me-5) ppm; <sup>13</sup>C NMR (100.6 MHz, CDCl<sub>3</sub>) δ 188.1 (C=O), 148.6 (C-11), 146.8 (C-5a), 141.1 (C<sub>i</sub>), 139.1 (C-9a), 132.9 (C-11a), 131.2 (C<sub>p</sub>), 130.4 (C-7), 128.4 (C<sub>m</sub>), 128.3 (C-8), 127.6 (C<sub>o</sub>), 123.6 (C-6), 118.3 (C-9), 116.4 (C-3), 115.4 (C-2), 113.1 (C-1), 91.6 (C-4a), 90.0 (=CH), 48.2 (C-5), 26.1 (Me-5), 23.9 (Me-4a), 19.8 (Me-5) ppm; IR (film): ν = 1642 (C=O), 1536 (C=C) cm<sup>-1</sup>; MS (EI) *m/z*: 388 (12) [M]<sup>+</sup>, 285 (28), 284 (15), 283 (73) [M – PhCO]<sup>+</sup>, 270 (23), 269 (18), 268 (65) [283 – Me]<sup>+</sup>, 115 (26), 105 (92) [PhCO]<sup>+</sup>, 77 (100) [Ph]<sup>+</sup>, 51 (29), 41 (10), 39 (17); HRMS (ESI-TOF) *m/z* [M+H]<sup>+</sup> calcd for C<sub>24</sub>H<sub>22</sub>ClN<sub>2</sub>O<sup>+</sup>: 389.1421, found: 389.1424.

**(E)-4a,5,5-Trimethyl-11-(2-oxo-2-phenylethylidene)-4a,5-dihydro-11H-pyrrolo[1',2':3,4]imidazo[1,2-a]indole-carbonitrile (3e).**

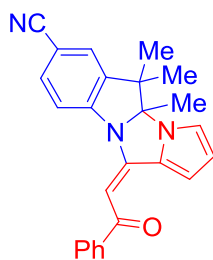

Obtained from 3*H*-indole **1e** (92 mg, 0.5 mmol) and pyrrolylacetylene **2a** (98 mg, 0.5 mmol). Light yellow solid; yield: 28 mg (15% – procedure A), 65 mg (yield 34% – procedure B); mp 170–171 °C (EtOH); <sup>1</sup>H NMR (400.1 MHz, CDCl<sub>3</sub>) δ 7.98–7.97 (nr m, 2 H, H<sub>o</sub>), 7.85 (dd, *J* = 3.8, 1.0 Hz, 1 H, H-1), 7.72 (d, *J* = 8.2 Hz, 1 H, H-9), 7.52–7.44 (m, 5 H, H<sub>*m,p*</sub>; H-8; H-6), 7.00 (dd, *J* = 2.7, 1.0 Hz, 1 H, H-3), 6.71 (s, 1 H, =CH), 6.57 (dd, *J* = 3.8, 2.7 Hz, 1 H, H-2), 1.64 (s, 3 H, Me-4a), 1.61 (s, 3 H, Me-5), 0.83 (s, 3 H, Me-5) ppm; <sup>13</sup>C NMR (100.6 MHz, CDCl<sub>3</sub>) δ 188.1 (C=O), 147.3 (C-11), 146.0 (C-5a), 144.2 (C-9a), 140.8 (C<sub>*i*</sub>), 133.5 (C-8), 132.6 (C-11a), 131.5 (C<sub>*p*</sub>), 128.5 (C<sub>*m*</sub>), 127.6 (C<sub>*o*</sub>), 126.5 (C-6), 118.8 (CN), 117.0 (C-9), 116.8 (C-3), 115.8 (C-2), 113.5 (C-1), 107.9 (C-7), 91.5 (C-4a), 91.1 (=CH), 47.8 (C-5), 26.4 (Me-5), 24.29 (Me-4a), 19.7 (Me-5) ppm; IR (film): *ν* = 2225 (CN), 1644 (C=O), 1540 (C=C) cm<sup>-1</sup>; MS (EI) *m/z*: 379 (15) [M]<sup>+</sup>, 275 (21), 274 (72) [M – PhCO]<sup>+</sup>, 259 (82) [274 – Me]<sup>+</sup>, 278 (22), 115 (12), 105 (100) [PhCO]<sup>+</sup>, 77 (98) [Ph]<sup>+</sup>, 51 (27), 39 (19); HRMS (ESI-TOF) *m/z* [M+H]<sup>+</sup> calcd for C<sub>25</sub>H<sub>22</sub>N<sub>3</sub>O<sup>+</sup>: 380.1763, found: 380.1764.

**(E)-1-Phenyl-2-(4a,5,5-trimethyl-7-nitro-4a,5-dihydro-11*H*-pyrrolo[1',2':3,4]imidazo[1,2-*a*]indol-11-ylidene)ethan-1-one (3f).**

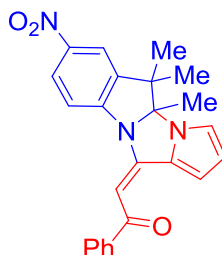

Obtained from 3*H*-indole **1f** (102 mg, 0.5 mmol) and pyrrolylacetylene **2a** (98 mg, 0.5 mmol). Citric needles; 18 mg (yield 9% – procedure A), 39 mg (yield 20% – procedure B); mp 188–189 °C (hexane/EtOAc); <sup>1</sup>H NMR (400.1 MHz, CDCl<sub>3</sub>) δ 8.36 (d, *J* = 8.6 Hz, 1 H, H-8), 8.07 (s, 1 H, H-6), 7.99–7.97 (m, 2 H, H<sub>*o*</sub>), 7.86 (dd, *J* = 3.8, 1.0 Hz, 1 H, H-1), 7.51–7.47 (m, 4 H, H<sub>*m,p*</sub>; H-9), 7.02 (br s, 1 H, H-3), 6.75 (s, 1 H, =CH), 6.58 (dd, *J* = 3.8, 2.5 Hz, 1 H, H-2), 1.67 (s, 6 H, Me-4a; Me-5), 0.88 (s, 3 H, Me-5) ppm; <sup>13</sup>C NMR (100.6 MHz, CDCl<sub>3</sub>) δ 188.1 (C=O), 146.9 (C-11), 146.1 (C-5a), 145.9 (C-9a), 144.6 (C-7), 140.7 (C<sub>*i*</sub>), 132.6 (C-11a), 131.5 (C<sub>*p*</sub>), 128.5 (C<sub>*m*</sub>), 127.6 (C<sub>*o*</sub>), 125.5 (C-8), 118.9 (C-6), 116.9 (C-3), 116.0 (C-9), 115.9 (C-2), 113.7 (C-1), 91.9 (C-4a), 91.4 (=CH), 47.8 (C-5), 26.4 (Me-5), 24.3 (Me-4a), 19.7 (Me-5) ppm; IR (film): *ν* = 1645 (C=O), 1542 (C=C), 1519 (NO<sub>2</sub>) cm<sup>-1</sup>; MS (EI) *m/z*: 399 (14) [M]<sup>+</sup>, 295 (20), 294 (92) [M – PhCO]<sup>+</sup>, 233 (22), 115 (24), 105 (100) [PhCO]<sup>+</sup>, 77 (94) [Ph]<sup>+</sup>, 51 (22), 39 (12); HRMS (ESI-TOF) *m/z* [M+H]<sup>+</sup> calcd for C<sub>24</sub>H<sub>22</sub>N<sub>3</sub>O<sup>+</sup>: 400.1661, found: 400.1662.

**(E)-1-Phenyl-2-(12a,13,13-trimethyl-12a,13-dihydro-8*H*-benzo[*e*]pyrrolo[1',2':3,4]-imidazo[1,2-*a*]indol-8-ylidene)ethan-1-one (3h).**

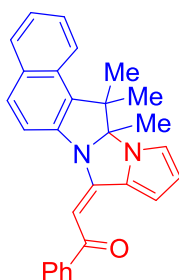

Obtained from 3*H*-indole **1h** (105 mg, 0.5 mmol) and pyrrolylacetylene **2a** (98 mg, 0.5 mmol). Pale yellow solid; 146 mg (yield 72% – procedure A), 178 mg (yield 88% – procedure B); mp 215–216 °C (CHCl<sub>3</sub>/hexane); <sup>1</sup>H NMR (400.1 MHz, CDCl<sub>3</sub>) δ 8.11 (d, *J* = 8.4 Hz, 1 H, H-1), 7.98–7.93 (m, 4 H, H<sub>o</sub>; H-5; H-6), 7.87 (dd, *J* = 3.9, 1.1 Hz, 1 H, H-9), 7.69 (d, *J* = 8.6 Hz, 1 H, H-4), 7.55–7.52 (m, 1 H, H-2), 7.48–7.43 (m, 4 H, H-3; H<sub>*m,p*</sub>), 7.09 (dd, *J* = 2.6, 1.1 Hz, 1 H, H-11), 6.83 (s, 1 H, =CH), 6.58 (dd, *J* = 3.9, 2.6 Hz, 1 H, H-10), 1.99 (s, 3 H, Me-12a), 1.76 (s, 3 H, Me-13), 1.02 (s, 3 H, Me-13) ppm; <sup>13</sup>C NMR (100.6 MHz, CDCl<sub>3</sub>) δ 188.0 (C=O), 149.5 (C-8), 141.3 (C<sub>*i*</sub>), 138.6 (C-13a), 136.8 (C-6a), 133.3 (C-8a), 132.1 (C-4a), 131.0 (C<sub>*p*</sub>), 130.4 (C-1a), 129.8 (C-4), 128.3 (C<sub>*m*</sub>), 127.6 (C<sub>*o*</sub>), 127.7 (C-3), 127.1 (C-2), 124.8 (C-3), 122.4 (C-1), 117.5 (C-11), 116.3 (C-6), 115.2 (C-10), 112.9 (C-9), 91.6 (C-12a), 89.3 (=CH), 49.9 (C-13), 24.4 (Me-13), 23.8 (Me-12a), 22.4 (Me-13) ppm; IR (film): ν = 1639 (C=O), 1513 (C=C) cm<sup>-1</sup>; MS (EI) *m/z*: 404 (427) [M]<sup>+</sup>, 299 (100) [M – PhCO]<sup>+</sup>, 284 (75) [299 – Me]<sup>+</sup>, 194 (21), 152 (12), 105 (47) [PhCO]<sup>+</sup>, 77 (21) [Ph]<sup>+</sup>; HRMS (ESI-TOF) *m/z* [M+H]<sup>+</sup> calcd for C<sub>28</sub>H<sub>25</sub>N<sub>2</sub>O<sup>+</sup>: 405.1967, found: 405.1968.

**(E)-1-(Furan-2-yl)-2-(4a,5,5-trimethyl-4a,5-dihydro-11*H*-pyrrolo[1',2':3,4]imidazo[1,2-*a*]indol-11-ylidene)ethan-1-one (3i).**

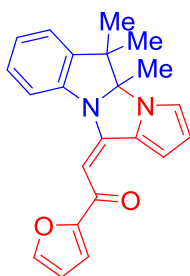

Obtained from 3*H*-indole **1a** (80 mg, 0.5 mmol) and pyrrolylacetylene **2b** (93 mg, 0.5 mmol). Yellow solid; 125 mg (yield 73% – procedure A), 131 mg (yield 76% – procedure B); mp 133–135 °C (hexane/CHCl<sub>3</sub>); <sup>1</sup>H NMR (400.1 MHz, CDCl<sub>3</sub>) δ 7.81 (dd, *J* = 3.9, 1.1 Hz, 1 H, H-1), 7.53 (dd, *J* = 1.7, 0.7 Hz, 1 H, H-5'), 7.47–7.45 (m, 1 H, H-9), 7.43–7.39 (m, 1 H, H-8), 7.21–7.16 (m, 2 H, H-6, H-7), 7.15 (dd, *J* = 3.4, 0.7 Hz, 1 H, H-3'), 6.98 (dd, *J* = 2.6, 1.1 Hz, 1 H, H-3), 6.70 (s, 1 H, =CH), 6.53 (dd, *J* = 3.9, 2.6 Hz, 1 H, H-2), 6.50 (dd, *J* = 3.4, 1.7 Hz, 1 H, H-4'), 1.63 (s, 3 H, Me-4a), 1.57 (s, 3 H, Me-5), 0.76 (s, 3 H, Me-5) ppm; <sup>13</sup>C NMR (100.6 MHz, CDCl<sub>3</sub>) δ 176.7 (C=O), 155.4 (C-2'), 148.8 (C-11), 144.8 (C-5a), 144.7 (C-5a), 144.4 (C-5'), 140.2 (C-9a), 133.1 (C-11a), 128.4 (C-8), 125.1 (C-7), 123.0 (C-6), 117.5 (C-9), 116.4 (C-3), 115.2 (C-2), 113.5 (C-3'), 112.1 (C-4'), 91.6 (C-4a), 88.8 (=CH), 47.7 (C-5), 26.1 (Me-5), 23.9 (Me-4a), 19.9 (Me-5) ppm; <sup>15</sup>N NMR (40.6 MHz, CDCl<sub>3</sub>) δ –197.3 (N-4), –241.2 (N-10) ppm; IR (film): ν = 1637 (C=O), 1537 (C=C) cm<sup>-1</sup>; MS (EI) *m/z*: 344 (34) [M]<sup>+</sup>, 249 (84) [M – FurylCO]<sup>+</sup>, 234 (100) [249 – Me]<sup>+</sup>, 95 (87) [FurylCO]<sup>+</sup>; HRMS (ESI-TOF) *m/z* [M+H]<sup>+</sup> calcd for C<sub>22</sub>H<sub>21</sub>N<sub>2</sub>O<sub>2</sub><sup>+</sup>: 345.1603, found: 345.1605.

**(E)-1-(Thien-2-yl)-2-(4a,5,5-trimethyl-4a,5-dihydro-11*H*-pyrrolo[1',2':3,4]imidazo[1,2-*a*]indol-11-ylidene)ethan-1-one (3j).**

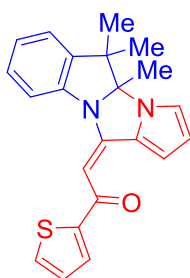

Obtained from 3*H*-indole **1a** (80 mg, 0.5 mmol) and pyrrolylacetylene **2c** (101 mg, 0.5 mmol). Brownish solid; 126 mg (yield 70% – procedures A and B); mp 101–103 °C (hexane/CHCl<sub>3</sub>); <sup>1</sup>H NMR (400.1 MHz, CDCl<sub>3</sub>) δ 7.80 (dd, *J* = 3.8, 1.0 Hz, 1 H, H-1), 7.70 (dd, *J* = 3.8, 0.9 Hz, 1 H, H-3'), 7.50 (dd, *J* = .8, 0.9 Hz, 1 H, H-5'), 7.42–7.41 (nr m, 2 H, H-8; H-9), 7.20–7.18 (m, 2 H, H-6; H-7), 7.11 (dd, *J* = 4.8, 3.8 Hz, 1 H, H-4'), 6.99 (dd, *J* = 2.6, 1.0 Hz, 1 H, H-3), 6.65 (s, 1 H, =CH), 6.53 (dd, *J* 3.7, 2.6 Hz, 1 H, H-2), 1.63 (s, 3 H, Me-4a), 1.57 (s, 3 H, Me-5), 0.77 (s, 3 H, Me-5) ppm; <sup>13</sup>C NMR (100.6 MHz, CDCl<sub>3</sub>) δ 180.2 (C=O), 148.7 (C-11), 148.3 (C-2'), 144.8 (C-5a), 140.3 (C-9a), 133.0 (C-11a), 130.7 (C-5'), 128.6 (C-8), 128.3 (C-3'), 127.8 (C-4'), 125.1 (C-7), 123.0 (C-6), 117.4 (C-9), 116.4 (C-3), 115.2 (C-2), 113.0 (C-1), 91.6 (C-4a), 88.8 (=CH), 47.8 (C-5), 26.1 (Me-5), 23.9 (Me-4a), 19.9 (Me-5) ppm; IR (film): ν = 1627 (C=O), 1538 (C=C) cm<sup>-1</sup>; MS (EI) *m/z*: 360 (21) [M]<sup>+</sup>, 249 (92) [M – ThCO]<sup>+</sup>, 234 (100) [249 – Me]<sup>+</sup>, 111 (74) [ThCO]<sup>+</sup>, 91 (18), 77 (18), 39 (52); HRMS (ESI-TOF) *m/z* [M+H]<sup>+</sup> calcd for C<sub>22</sub>H<sub>21</sub>N<sub>2</sub>O<sub>5</sub><sup>+</sup>: 361.1375, found: 361.1377.

**(E)-1-(Furan-2-yl)-2-(12a,13,13-trimethyl-12a,13-dihydro-8H-benzo[e]pyrrolo[1',2':3,4]imidazo[1,2-a]indol-8-ylidene)ethan-1-one (3k).**

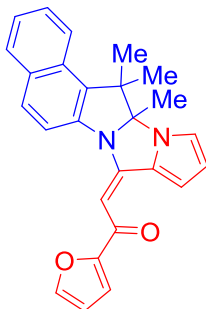

Obtained from 3*H*-indole **1h** (105 mg, 0.5 mmol) and pyrrolylacetylene **2b** (93 mg, 0.5 mmol). Yellow solid; 144 mg (yield 73% – procedure A), 154 mg (yield 78% – procedure B); mp 198–200 °C; <sup>1</sup>H NMR (400.1 MHz, CDCl<sub>3</sub>) δ 8.09 (d, *J* = 8.5 Hz, 1 H, H-1), 7.96 (d, *J* = 8.6 Hz, 1 H, H-5), 7.93 (d, *J* = 8.2 Hz, 1 H, H-6), 7.85 (dd, *J* = 3.9, 1.1 Hz, 1 H, H-9), 7.72 (d, *J* = 8.6 Hz, 1 H, H-4), 7.53–7.50 (m, 2 H, H-5', H-2), 7.45 (t, *J* = 7.4 Hz, 1 H, H-3), 7.13 (dd, *J* = 3.4, 0.7 Hz, 1 H, H-3'), 7.08 (br s, 1 H, H-11), 6.79 (s, 1 H, =CH), 6.56 (dd, *J* = 3.9, 2.6 Hz, 1 H, H-10), 6.50 (dd, *J* = 3.4, 1.7 Hz, 1 H, H-4'), 1.97 (s, 3 H, Me-12a), 1.74 (s, 3 H, Me-13), 0.99 (s, 3 H, Me-12) ppm; <sup>13</sup>C NMR (100.6 MHz, CDCl<sub>3</sub>): δ 176.6 (C=O), 155.4 (C-2'), 149.3 (C-8), 144.3 (C-5'), 138.3 (C-13a), 136.7 (C-6a), 133.3 (C-8a), 132.0 (C-4a), 130.3 (C-13b), 129.7 (C-4), 129.6 (C-5), 127.0 (C-2), 124.8 (C-3), 122.3 (C-1), 117.4 (C-11), 116.3 (C-6), 115.2 (C-10), 113.5 (C-3'), 113.0 (C-9), 112.0 (C-4'), 91.6 (C-12a), 88.4 (=CH), 49.8 (C-13), 24.3 (Me-13), 23.8 (Me-12a), 22.4 (Me-13) ppm; IR (film): ν = 1636 (C=O), 1514 (C=C) cm<sup>-1</sup>; MS (EI) *m/z*: 394 (52) [M]<sup>+</sup>, 299 (100) [M – FurylCO]<sup>+</sup>, 284 (75) [299 – Me]<sup>+</sup>, 95 (29) [FurylCO]<sup>+</sup>; HRMS (ESI-TOF) *m/z* [M+H]<sup>+</sup> calcd for C<sub>26</sub>H<sub>23</sub>N<sub>2</sub>O<sub>2</sub><sup>+</sup>: 395.1760, found: 395.1761.

**(E)-1-(Thien-2-yl)-2-(12a,13,13-trimethyl-12a,13-dihydro-8H-benzo[e]pyrrolo[1',2':3,4]imidazo[1,2-a]indol-8-ylidene)ethan-1-one (3l).**



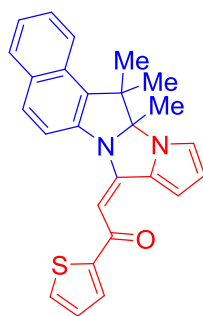

Obtained from 3*H*-indole **1h** (105 mg, 0.5 mmol) and pyrrolylacetylene **2c** (101 mg, 0.5 mmol). Yellow solid; 164 mg (yield 80% – procedure A); 166 mg (yield 81% – procedure B); mp 206–208 °C (hexane/EtOAc); <sup>1</sup>H NMR (400.1 MHz, CDCl<sub>3</sub>) δ 8.10 (d, *J* = 8.4 Hz, 1 H, H-1), 7.98–7.93 (m, 2 H, H-4, H-5), 7.83 (br s, 1 H, H-9), 7.70–7.68 (m, 2 H, H-6, H-3'), 7.55–7.45 (m, 3 H, H-2, H-3, H-5'), 7.11–7.10 (m, 2 H, H-11, H-4'), 6.73 (s, 1 H, =CH), 6.56 (br s, 1 H, H-10), 1.97 (s, 3 H, Me-12a), 1.75 (s, 3 H, Me-13), 1.00 (s, 3 H, Me-13) ppm; <sup>13</sup>C NMR (100.6 MHz, CDCl<sub>3</sub>) δ 180.1 (C=O), 149.3 (C-8), 148.3 (C-2'), 138.4 (C-6a), 136.8 (C-13a), 133.2 (C-8a), 132.1 (C-4a), 130.7 (C-5'), 130.4 (C-13b), 129.8 (C-5), 129.7 (C-4), 128.6 (C-3'), 127.8 (C-4'), 127.1 (C-2), 124.8 (C-3), 122.4 (C-1), 117.3 (C-6), 116.4 (C-11), 115.2 (C-10), 113.0 (C-9), 91.7 (C-12a), 88.9 (=CH), 49.9 (C-13), 24.3 (Me-13), 23.8 (Me-12a), 22.4 (Me-13) ppm; IR (film):  $\nu$  = 1626 (C=O), 1513 (C=C) cm<sup>-1</sup>; MS (EI) *m/z*: 410 (8) [M]<sup>+</sup>, 299 (100) [M – ThCO]<sup>+</sup>, 284 (52) [299 – Me]<sup>+</sup>, 194 (20), 165 (19), 111 (100) [ThCO]<sup>+</sup>, 83 (12) [Th]<sup>+</sup>, 39 (37); HRMS (ESI-TOF) *m/z* [M+H]<sup>+</sup> calcd for C<sub>26</sub>H<sub>23</sub>N<sub>2</sub>O S<sup>+</sup>: 411.1531, found: 411.1530.

**(E)-1-Phenyl-2-(5a,6,6-trimethyl-1,2,3,4a,5-hexahydro-12*H*-imidazo[1,2-*a*:3,4-*a'*]diindol-12-ylidene)ethan-1-one (3m).**

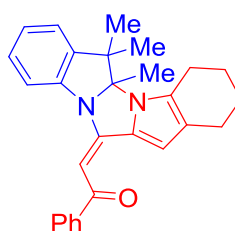

Obtained from 3*H*-indole **1a** (80 mg, 0.5 mmol) and pyrrolylacetylene **2f** (125 mg, 0.5 mmol). Orange solid; 71 mg (yield 40% – procedure A), 96 mg (yield 54% – procedure B); mp 135–137 °C (hexane); <sup>1</sup>H NMR (400.1 MHz, CDCl<sub>3</sub>) δ 8.00–7.98 (m, 2 H, H<sub>o</sub>), 7.71 (s, 1 H, H-13), 7.46–7.44 (m, 3 H, H<sub>m,p</sub>), 7.39 (nr m, 2 H, H-9, H-10), 7.21–7.14 (m, 2 H, H-7, H-8), 6.66 (s, 1 H, =CH), 2.84–2.74 (m, 2 H, H-4), 2.69–2.66 (m, 2 H, H-1), 1.94–1.92 (m, 2 H, H-3), 1.87–1.73 (m, 2 H, H-2), 1.63 (s, 6 H, Me-5a, Me-6), 0.88 (s, 3 H, Me-6) ppm; <sup>13</sup>C NMR (100.6 MHz, CDCl<sub>3</sub>) δ 187.5 (C=O), 148.5 (C-12), 144.7 (C-6a), 141.7 (C<sub>i</sub>), 139.9 (C-10a), 131.5 (C-12a), 131.0 (C<sub>p</sub>), 128.3 (C-4a), 128.2 (C<sub>m</sub>; C-9), 127.5 (C<sub>o</sub>), 125.2 (C-13a), 124.7 (C-8), 123.0 (C-7), 117.1 (C-10), 112.3 (C-13), 92.4 (C-5a), 88.4 (=CH), 47.7 (C-5), 29.8 (C-4), 27.0 (Me-6), 23.9 (C-1), 23.6, 23.3 (C-2, C-3), 22.2 (Me-5a), 20.7 (Me-6) ppm; <sup>15</sup>N NMR (40.6 MHz, CDCl<sub>3</sub>) δ –203.2 (N-5), –241.2 (N-11) ppm; IR (film):  $\nu$  = 1640 (C=O), 1534 (C=C) cm<sup>-1</sup>; MS (EI) *m/z*: 354 (27) [M]<sup>+</sup>, 249 (100) [M – PhCO]<sup>+</sup>, 234 (83) [249 – Me]<sup>+</sup>, 233 (17), 105 (27) [PhCO]<sup>+</sup>, 77 (28) [Ph]<sup>+</sup>; HRMS (ESI-TOF) *m/z* [M+H]<sup>+</sup> calcd for C<sub>28</sub>H<sub>29</sub>N<sub>2</sub>O<sup>+</sup>: 355.1810, found: 355.1813.

**(E)-1-Phenyl-2-(4a,5,5-trimethyl-3-phenyl-4a,5-dihydro-11*H*-pyrrolo[1',2':3,4]imidazo[1,2-*a*]indol-11-ylidene)ethan-1-one (3n).**

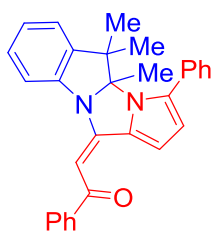

Obtained from 3*H*-indole **1a** (80 mg, 0.5 mmol) and pyrrolylacetylene **2d** (136 mg, 0.5 mmol). Yellow solid; 93 mg (yield 43% – procedure A), 110 mg (yield 52% – procedure B); mp 169–171 °C (hexane); <sup>1</sup>H NMR (400.1 MHz, CDCl<sub>3</sub>) δ 8.01–8.00 (nr m, 3 H, H-1, H<sub>o</sub>, Ph), 7.48 (nr m, 8 H, H<sub>m,p</sub>, Ph; Ph'), 7.41–7.37 (m, 2 H, H-8, H-9), 7.14–7.08 (m, 2 H, H-6, H-7), 6.74 (s, 1 H, =CH), 6.44 (br s, 1 H, H-2), 1.67 (s, 3 H, Me-5), 0.88 (s, 3 H, Me-5), 0.82 (s, 3 H, Me-4a) ppm; <sup>13</sup>C NMR (100.6 MHz, CDCl<sub>3</sub>) δ 187.8 (C=O), 148.4 (C-11), 145.2 (C-5a), 141.5 (C<sub>i</sub>, Ph), 139.8 (C-9a), 133.7 (C<sub>i</sub>, Ph'), 133.5 (C-3), 133.0 (C-11a), 131.1 (C<sub>m</sub>, Ph'), 130.9 (C<sub>p</sub>, Ph), 128.9 (C<sub>p</sub>, Ph'), 128.3 (C<sub>o</sub>, Ph'), 128.1 (C<sub>m</sub>, Ph; C-8), 127.6 (C<sub>o</sub>, Ph), 125.0 (C-7), 123.0 (C-6), 117.3 (C-9), 116.1 (C-2), 112.9 (C-1), 93.3 (C-4a), 89.1 (=CH), 48.0 (C-5), 26.2 (Me-5), 24.8 (Me-4a), 19.1 (Me-5) ppm; IR (film): ν = 1640 (C=O), 1534 (C=C) cm<sup>-1</sup>; MS (EI) *m/z*: 430 (87) [M]<sup>+</sup>, 325 (37) [M – PhCO]<sup>+</sup>, 310 (21) [325 – Me]<sup>+</sup>, 105 (100) [PhCO]<sup>+</sup>, 77 (77) [Ph]<sup>+</sup>, 51 (12); HRMS (ESI-TOF) *m/z* [M+H]<sup>+</sup> calcd for C<sub>30</sub>H<sub>27</sub>N<sub>2</sub>O<sup>+</sup>: 431.2123, found: 431.2126.

**(E)-2-(7-fluoro-4a,5,5-trimethyl-3-(thiophen-2-yl)-4a,5-dihydro-11H-pyrrolo[1',2':3,4]imidazo[1,2-a]indol-11-ylidene)-1-phenylethan-1-one (3o).**

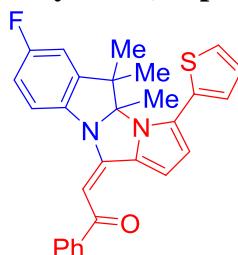

Obtained from 3*H*-indole **1c** (89 mg, 0.5 mmol) and pyrrolylacetylene **2e** (139 mg, 0.5 mmol). Orange solid; 98 mg (yield 43% – procedure A), 123 mg (yield 54% – procedure B); mp 123–125 °C (hexane/EtOAc); <sup>1</sup>H NMR (400.1 MHz, CDCl<sub>3</sub>) δ 7.99–7.97 (m, 2 H, H<sub>o</sub>), 7.94 (d, *J* = 3.9 Hz, 1 H, H-1), 7.50–7.44 (m, 4 H, H<sub>m,p</sub>; H-5'), 7.33 (dd, *J* = 8.6, 4.3 Hz, 1 H, H-9), 7.21 (dd, *J* = 3.8, 0.9 Hz, 1 H, H-3'), 7.14 (dd, *J* = 4.8, 3.8 Hz, 1 H, H-4'), 7.06 (ddd, *J* = 8.7, 8.0, 2.6 Hz, 1 H, H-8), 6.85 (dd, *J* = 8.0, 2.6 Hz, 1 H, H-6), 6.66 (s, 1 H, =CH), 6.56 (d, *J* = 3.9 Hz, 1 H, H-2), 1.78 (s, 3 H, Me-5), 1.03 (s, 3 H, Me-4a), 0.85 (s, 3 H, Me-5) ppm; <sup>13</sup>C NMR (100.6 MHz, CDCl<sub>3</sub>) δ 187.9 (C=O), 160.4 (d, *J* = 244.8 Hz, C-7), 148.0 (C-11), 147.5 (d, *J* = 7.7 Hz, C-5a), 141.3 (C<sub>i</sub>), 135.8 (d, *J* = 2.0 Hz, C-9a), 134.4 (C-2'), 132.8 (C-11a), 131.1 (C-5'), 130.1 (C<sub>p</sub>), 128.4 (C<sub>m</sub>), 127.6 (C<sub>o</sub>; C-3'), 127.1 (C-4'), 124.7 (C-3), 118.9 (C-2), 118.1 (d, *J* 8.5 Hz, C-9), 114.6 (d, *J* = 23.7 Hz, C-8), 112.9 (C-1), 111.0 (d, *J* = 21.1 Hz, C-6), 93.7 (C-4a), 89.4 (=CH), 48.4 (C-5), 26.2 (Me-5), 24.7 (Me-4a), 19.3 (Me-5) ppm; <sup>19</sup>F NMR (376.5 MHz, CDCl<sub>3</sub>): δ –116.79 ppm; IR (film): ν = 1643 (C=O), 1538 (C=C) cm<sup>-1</sup>; MS (EI) *m/z*: 454 (7) [M]<sup>+</sup>, 349 (19) [M – PhCO]<sup>+</sup>, 334 (10) [349 – Me]<sup>+</sup>, 105 (100) [PhCO]<sup>+</sup>, 77 (59) [Ph]<sup>+</sup>; HRMS (ESI-TOF) *m/z* [M+H]<sup>+</sup> calcd for C<sub>28</sub>H<sub>24</sub>FN<sub>2</sub>OS<sup>+</sup>: 456.1672, found: 456.1675.

**(E)-2-(4a'-methyl-4a'H,11'H-spiro[cyclohexane-1,5'-pyrrolo[1',2':3,4]imidazo[1,2-a]indol]-11-ylidene)-1-phenylethan-1-one (3p).**

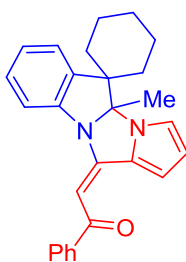

Obtained from 3*H*-indole **1i** (100 mg, 0.5 mmol) and pyrrolylacetylene **2a** (98 mg, 0.5 mmol). Yellow solid; 138 mg (yield 70% – procedure B); mp 141–143 °C (hexane); <sup>1</sup>H NMR (400.1 MHz, CDCl<sub>3</sub>) δ 7.99–7.97 (m, 2 H, H<sub>o</sub>), 7.86 (d, *J* = 3.5 Hz, 1 H, H-1'), 7.53 (d, *J* = 7.5 Hz, 1 H, H-6'), 7.48–7.44 (m, 3 H, H<sub>*m,p*</sub>), 7.41–7.40 (m, 2 H, H-8', H-9'), 7.19–7.15 (m, 1 H, H-7'), 7.06 (d, *J* = 2.6 Hz, 1 H, H-3'), 6.72 (s, 1 H, =CH), 6.56 (dd, *J* = 3.5, 2.6 Hz, 1 H, H-2'), 2.22–2.18 (m, 1 H, Cy), 2.03–1.96 (m, 1 H, Cy), 1.91–1.88 (m, 2 H, Cy), 1.71–1.66 (m, 1 H, Cy), 1.61 (s, 3 H, Me-4a), 1.29–1.25 (m, 3 H, Cy), 1.03–1.01 (m, 2 H, Cy) ppm; <sup>13</sup>C NMR (100.6 MHz, CDCl<sub>3</sub>) δ 188.1 (C=O), 148.9 (C-11'), 144.3 (C-5a'), 141.3 (C<sub>*i*</sub>), 140.6 (C-9a'), 133.4 (C-11a'), 131.0 (C<sub>*p*</sub>), 128.3 (C<sub>*m*</sub>), 128.1 (C-8'), 127.6 (C<sub>*o*</sub>), 125.8 (C-7'), 124.5 (C-6'), 118.0 (C-3'), 116.9 (C-9'), 115.1 (C-2'), 112.9 (C-1'), 92.0 (C-4a'), 88.8 (=CH), 51.2 (C-5'), 33.1, 29.1, 25.3 23.4 (4×C, Cy), 23.3 (Me-4a), 20.8 (Cy) ppm; <sup>15</sup>N NMR (40.6 MHz, CDCl<sub>3</sub>) δ –241.3 (N-10), –198.3 (N-4) ppm; IR (film): ν = 1640 (C=O), 1534 (C=C) cm<sup>-1</sup>; MS (EI) *m/z*: 394 (11) [M]<sup>+</sup>, 289 (100) [M – PhCO]<sup>+</sup>, 246 (22), 105 (33) [PhCO]<sup>+</sup>, 77 (43) [Ph]<sup>+</sup>; HRMS (ESI-TOF) *m/z* [M+H]<sup>+</sup> calcd for C<sub>27</sub>H<sub>27</sub>N<sub>2</sub>O<sup>+</sup>: 395.2123, found 395.2122.

**(E)-1-(Furan-2-yl)-2-(4a'-methyl-4a'H,11'H-spiro[cyclohexane-1,5'-pyrrolo[1',2':3,4]imidazo[1,2-a]indol]-11'-ylidene)ethan-1-one (3q).**

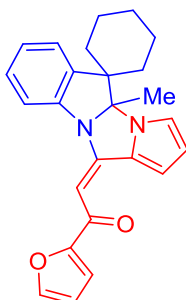

Obtained from 3*H*-indole **1i** (100 mg, 0.5 mmol) and pyrrolylacetylene **2b** (93 mg, 0.5 mmol). Light yellow solid; 107 mg (yield 56% – procedure B); mp 162–164 °C; <sup>1</sup>H NMR (400.1 MHz, CDCl<sub>3</sub>) δ 7.83 (d, *J* = 3.6 Hz, 1 H, H-1'), 7.52 (s, 1 H, H-5''), 7.51 (d, *J* = 6.7 Hz, 1 H, H-6'), 7.47–7.40 (m, 2 H, H-8', H-9'), 7.17 (t, *J* = 7.5 Hz, 1 H, H-7'), 7.13 (d, *J* = 3.0 Hz, 1 H, H-3''), 7.04 (br s, 1 H, H-3'), 6.68 (s, 1 H, =CH), 6.54 (dd, *J* = 3.6, 2.6 Hz, 1 H, H-2'), 6.50 (dd, *J* = 3.4, 1.7 Hz, 1 H, H-4''), 2.20–2.17 (m, 1 H, Cy), 2.02–1.95 (m, 1 H, Cy), 1.90–1.82 (m, 2 H, Cy), 1.72–1.66 (m, 1 H, Cy), 1.60 (s, 3 H, Me-4a), 1.31–1.23 (m, 3 H, Cy), 1.03–0.95 (m, 2 H, Cy) ppm; <sup>13</sup>C NMR (100.6 MHz, CDCl<sub>3</sub>) δ 176.7 (C=O), 155.5 (C-2''), 148.7 (C-11'), 144.3 (C-5a'), 144.2 (C-5''), 140.5 (C-9a'), 133.5 (C-11a'), 128.1 (C-8'), 125.8 (C-7'), 124.5 (C-6'), 118.0 (C-9'), 116.9 (C-3'), 115.1 (C-2'), 113.4 (C-3''), 113.0 (C-1'), 112.0 (C-4''), 92.1 (C-4a'), 87.9 (=CH), 51.1 (C-5'), 33.0, 29.1 (2×C, Cy), 25.2 (Me-4a), 23.4, 23.3, 20.8 (3×C, Cy) ppm; <sup>15</sup>N NMR (40.6 MHz, CDCl<sub>3</sub>) δ –198.2 (N-4), –240.8 (N-10) ppm; IR (film): ν = 1636 (C=O), 1535 (C=C) cm<sup>-1</sup>; MS (EI) *m/z*: 384 (21) [M]<sup>+</sup>, 289 (100) [M – Furoyl]<sup>+</sup>, 115 (13), 95 (36) [Furoyl]<sup>+</sup>, 41 (11), 39 (21); HRMS (ESI-TOF) *m/z* [M+H]<sup>+</sup> calcd for C<sub>25</sub>H<sub>25</sub>N<sub>2</sub>O<sub>2</sub><sup>+</sup>: 385.1916, found: 385.1918.

**(E)-2-(12a-Methyl-8H,12aH-spiro[benzo[e]pyrrolopyrrolo[1',2':3,4]imidazo[1,2-a]indole-13,1'-cyclohexan]-8-ylidene)-1-phenylethan-1-one (3r).**

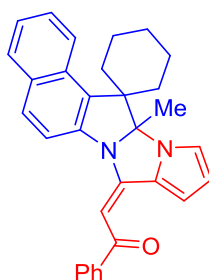

Obtained from 3*H*-indole **1j** (125 mg, 0.5 mmol) and pyrrolylacetylene **2a** (98 mg, 0.5 mmol). Purified by washing with diethyl ether. Light yellow solid; 187 mg (yield 84% – procedure B); mp 299–300 °C (CHCl<sub>3</sub>/EtOAc); <sup>1</sup>H NMR (400.1 MHz, CDCl<sub>3</sub>) δ 8.33 (d, *J* 8.7 Hz, 1 H, H-1), 7.95–7.93 (m, 4 H, H<sub>o</sub>; H-4, H-5), 7.89 (d, *J* = 3.5, 1.0 Hz, 1 H, H-9), 7.65 (d, *J* = 8.7 Hz, 1 H, H-6), 7.55–7.51 (m, 1 H, H-2), 7.46–7.40 (m, 4 H, H<sub>m,p</sub>; H-4), 7.25 (dd, *J* = 2.5, 1.0 Hz, 1 H, H-11), 6.77 (s, 1 H, =CH), 6.58 (dd, *J* = 3.5, 2.5 Hz, 1 H, H-10), 2.98 (td, *J* = 14.3, 3.9 Hz, 1 H, H-2'), 2.40 (d, *J* = 14.3 Hz, 1 H, H-2'), 2.08 (d, *J* = 14.0 Hz, 1 H, Cy), 1.92–1.75 (m, 3 H, Cy), 1.75 (s, 3 H, Me-12a), 1.68–1.09 (m, 4 H, Cy) ppm; <sup>13</sup>C NMR (100.6 MHz, CDCl<sub>3</sub>) δ 188.0 (C=O), 149.4 (C-8), 141.4 (C<sub>i</sub>), 137.7 (C-6a), 136.4 (C-13a), 134.1 (C-8a), 132.5 (C-4a), 131.0 (C<sub>p</sub>, Ph), 130.2 (2×C, C-4, C-5), 129.9 (C-1a), 128.3 (C<sub>m</sub>), 127.6 (C<sub>o</sub>), 126.8 (C-2), 124.5 (C-3), 122.5 (C-1), 120.0 (C-11), 117.5 (C-6), 115.2 (C-10), 113.4 (C-9), 92.3 (C-12a), 88.2 (=CH), 54.3 (C-13), 32.6, 29.4, 25.5 (3×C, Cy), 25.4 (Me-12a), 23.5, 22.5 (2×C, Cy) ppm; <sup>15</sup>N NMR (40.6 MHz, CDCl<sub>3</sub>) δ –198.1 (N-12), –241.2 (N-7) ppm; IR (film): ν = 1637 (C=O), 1537 (C=C) cm<sup>-1</sup>; MS (EI) *m/z*: 444 (8) [M]<sup>+</sup>, 339 (100) [M – PhCO]<sup>+</sup>, 194 (14), 165 (18), 105 (88) [PhCO]<sup>+</sup>, 77 (76) [Ph]<sup>+</sup>, 51 (12), 44 (18), 41 (13); HRMS (ESI-TOF) *m/z* [M+H]<sup>+</sup> calcd for C<sub>31</sub>H<sub>29</sub>N<sub>2</sub>O<sup>+</sup>: 445.22799, found: 445.22799.

**(E)-2-(12a-Methyl-8*H*,12a*H*-spiro[benzo[*e*]pyrrolo[1',2':3,4]imidazo[1,2-*a*]indole-13,1'-cyclohexan]-8-ylidene)-1-(thiophen-2-yl)ethan-1-one (3s).**

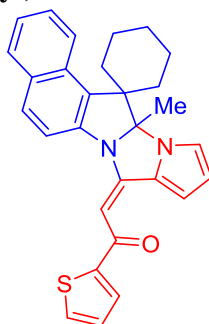

Obtained from 3*H*-indole **1j** (125 mg, 0.5 mmol) and pyrrolylacetylene **2c** (101 mg, 0.5 mmol). Light yellow solid; 135 mg (yield 60% – procedure B); mp 283–285 °C (CHCl<sub>3</sub>/hexane); <sup>1</sup>H NMR (400.1 MHz, CDCl<sub>3</sub>) δ 8.32 (d, *J* = 8.6 Hz, 1 H, H-1), 7.92–7.89 (m, 2 H, H-4, H-5), 7.84 (d, *J* = 3.7 Hz, 1 H, H-9), 7.65 (dd, *J* = 8.7, 8.8 Hz, 1 H, H-6), 7.62 (d, *J* = 3.7 Hz, 1 H, H-3''), 7.54 (dd, *J* = 8.7, 8.6 Hz, 1 H, H-2), 7.49 (d, *J* = 4.9 Hz, 1 H, H-5''), 7.45 (dd, *J* = 8.7, 8.6 Hz, 1 H, H-3), 7.24 (dd, *J* = 2.5, 1.0 Hz, 1 H, H-11), 7.09–7.07 (m, 1 H, H-4''), 6.68 (s, 1 H, =CH), 6.57 (dd, *J* = 3.7, 2.5 Hz, 1 H, H-10), 2.98 (td, *J* = 14.2, 3.6 Hz, 1 H, H-2'), 2.40 (d, *J* = 14.1 Hz, 1 H, Cy), 2.07 (d, *J* = 13.9 Hz, 1 H, Cy), 1.90 (d, *J* = 13.9 Hz, 1 H, Cy), 1.82 (dd, *J* = 14.1, 5.2 Hz, 1 H, Cy), 1.75 (s, 3 H, Me-12a), 1.75–1.73 (m, 1 H, H-6'), 1.66 (d, *J* = 15.2 Hz, 1 H, Cy), 1.51 (dt, *J* = 12.9, 3.9 Hz, 1 H, Cy), 1.36 (d, *J* = 14.1 Hz, 1 H, Cy), 1.10 (tt, *J* = 13.0, 4.3 Hz, 1 H, H-5') ppm; <sup>13</sup>C NMR (100.6 MHz, CDCl<sub>3</sub>) δ 180.2 (C=O), 149.1 (C-8), 148.5 (C-2''), 137.6 (C-6a), 136.4 (C-13a), 134.0 (C-8a), 132.6 (C-4a), 130.6 (C-5''), 130.2 (2×C, C-5, C-13b), 129.9 (C-4), 128.5 (C-3''), 127.7 (C-4''), 126.8 (C-2), 124.6 (C-3), 122.5 (C-1), 120.0 (C-11), 117.3 (C-6), 115.2 (C-10), 113.6 (C-9), 91.4 (C-12a), 87.8 (=CH), 54.3 (C-13), 32.6, 29.4 (2×C, C-2', C-6'), 25.4 (2×C, Me-12a, C-4'), 23.4, 22.5 (2×C, C-3', C-5') ppm; <sup>15</sup>N NMR (40.6 MHz, CDCl<sub>3</sub>) δ –198.1 (N-12), –241.2 (N-7) ppm; IR (film): ν = 1625 (C=O), 1513 (C=C) cm<sup>-1</sup>; MS (EI) *m/z*:

450 (18) [M]<sup>+</sup>, 340 (27), 339 (100) [M – ThCO]<sup>+</sup>, 165 (12), 111 (53) [ThCO]<sup>+</sup>, 39 (15); HRMS (ESI-TOF) *m/z* [M+H]<sup>+</sup> calcd for C<sub>29</sub>H<sub>27</sub>N<sub>2</sub>OS<sup>+</sup>: 451.1844, found: 451.1844.

**(E)-1-(Furan-2-yl)-2-(4a,5,5,7-tetramethyl-4a,5-dihydro-11H-pyrrolo[1',2':3,4]imidazo[1,2-a]indol-11-ylidene)ethan-1-one (3t).**

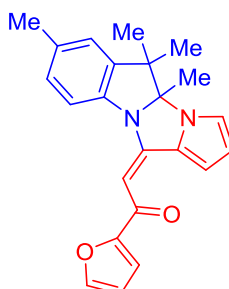

Obtained from 3*H*-indole **1b** (87 mg, 0.5 mmol) and pyrrolylacetylene **2b** (93 mg, 0.5 mmol). Light yellow solid; 142 mg (yield 79% – procedure B); mp 167–169 °C (CHCl<sub>3</sub>/hexane); <sup>1</sup>H NMR (400.1 MHz, CDCl<sub>3</sub>) δ 7.80 (dd, *J* = 3.8, 1.1 Hz, 1 H, H-1), 7.53 (dd, *J* = 1.7, 0.6 Hz, 1 H, H-5'), 7.34 (d, *J* = 7.9 Hz, 1 H, H-9), 7.20 (d, *J* = 7.9 Hz, 1 H, H-8), 7.13 (dd, *J* = 3.4, 0.6 Hz, 1 H, H-3'), 7.00 (s, 1 H, H-6), 6.98 (dd, *J* = 2.6, 1.1 Hz, 1 H, H-3), 6.66 (s, 1 H, =CH), 6.52 (dd, *J* = 3.8, 2.6 Hz, 1 H, H-2), 6.50 (dd, *J* = 3.4, 1.7 Hz, 1 H, H-4'), 2.39 (s, 3 H, Me-7), 1.62 (s, 3 H, Me-4a), 1.55 (s, 3 H, Me-5), 0.75 (s, 3 H, Me-5) ppm; <sup>13</sup>C NMR (100.6 MHz, CDCl<sub>3</sub>) δ 176.6 (C=O), 155.5 (C-2'), 149.0 (C-11), 144.8 (C-5a), 144.2 (C-5'), 137.8 (C-9a), 134.9 (C-7), 133.1 (C-11a), 128.7 (C-8), 123.7 (C-6), 117.2 (C-9), 116.3 (C-3), 115.1 (C-2), 113.3 (C-3'), 112.8 (C-1), 112.0 (C-4'), 91.7 (C-4a), 88.6 (=CH), 47.7 (C-5), 26.0 (Me-5), 23.8 (Me-4a), 21.3 (Me-7), 19.9 (Me-5) ppm; IR (film): *ν* = 1638 (C=O), 1542 (C=C) cm<sup>-1</sup>; MS (EI) *m/z*: 358 (37) [M]<sup>+</sup>, 263 (90) [M – FurylCO]<sup>+</sup>, 248 (100) [263 – Me]<sup>+</sup>, 95 (29) [FurylCO]<sup>+</sup>, 39 (16); HRMS (ESI-TOF) *m/z* [M+H]<sup>+</sup> calcd for C<sub>23</sub>H<sub>23</sub>N<sub>2</sub>O<sub>2</sub><sup>+</sup>: 359.1759, found: 359.1760.

**(E)-2-(7-Fluoro-4a,5,5-trimethyl-4a,5-dihydro-11H-pyrrolo[1',2':3,4]imidazo[1,2-a]indol-11-ylidene)-1-(thiophen-2-yl)ethan-1-one (3u).**

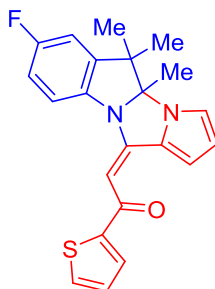

Obtained from 3*H*-indole **1c** (89 mg, 0.5 mmol) and pyrrolylacetylene **2c** (101 mg, 0.5 mmol). Yellow solid; 121 mg (yield 64% – procedure B); mp 191–192 °C (hexane); <sup>1</sup>H NMR (400.1 MHz, CDCl<sub>3</sub>) δ 7.78 (dd, *J* = 3.8, 1.0 Hz, 1 H, H-1), 7.68 (dd, *J* = 3.7, 1.0 Hz, 1 H, H-3'), 7.50 (dd, *J* = 4.9, 1.0 Hz, 1 H, H-5'), 7.34 (dd, *J* = 8.5, 4.3 Hz, 1 H, H-9), 7.12–7.06 (m, 2 H, H-8, H-4'), 6.98 (dd, *J* = 2.6, 1.0 Hz, 1 H, H-3), 6.92 (dd, *J* = 7.9, 2.6 Hz, 1 H, H-6), 6.56 (s, 1 H, =CH), 6.52 (dd, *J* = 3.8, 2.6 Hz, 1 H, H-2), 1.63 (s, 3 H, Me-4a), 1.54 (s, 3 H, Me-5), 0.75 (s, 3 H, Me-5) ppm; <sup>13</sup>C NMR (100.6 MHz, CDCl<sub>3</sub>) δ 180.2 (C=O), 160.5 (d, *J* = 245.0 Hz, C-7), 148.8 (C-11), 148.2 (C-2'), 147.1 (d, *J* = 7.6 Hz, C-5a), 136.5 (C-9a), 132.8 (C-11a), 130.8 (C-5'), 128.7 (C-3'), 127.8 (C-4'), 118.3 (d, *J* = 8.6 Hz, C-9), 116.4 (C-3), 115.4 (C-2), 114.7 (d, *J* = 23.6 Hz, C-6), 111.1 (C-1), 111.9 (d, *J* = 24.2 Hz, C-8), 91.8 (C-4a), 89.2 (=CH), 48.3 (C-5), 25.9 (Me-5), 23.7 (Me-4a), 19.8 (Me-5) ppm; <sup>15</sup>N NMR (40.6 MHz, CDCl<sub>3</sub>) δ –198.1 (N-4), –244.2 (N-10) ppm; <sup>19</sup>F NMR (376.5 MHz, CDCl<sub>3</sub>): δ –116.70 ppm; IR (film): *ν* = 1629 (C=O), 1539 (C=C) cm<sup>-1</sup>; MS (EI) *m/z*: 378 (22) [M]<sup>+</sup>, 267 (88) [M – ThCO]<sup>+</sup>, 252 (100) [267 – Me]<sup>+</sup>, 251 (23), 162 (11), 133 (13), 111 (74) [ThCO]<sup>+</sup>, 83 (12), 39 (31); HRMS (ESI-TOF) *m/z* [M+H]<sup>+</sup> calcd for C<sub>22</sub>H<sub>20</sub>FN<sub>2</sub>OS<sup>+</sup>: 379.1280, found: 379.1277.

**(E)-2-(3-Butyl-4a,5,5-trimethyl-2-propyl-4a,5-dihydro-11H-pyrrolo[1',2':3,4]imidazo[1,2-a]indol-11-ylidene) phenyl ethan-1-one (3v).**

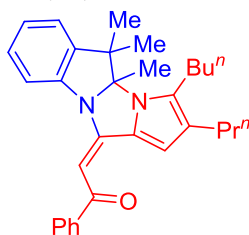

Obtained from 3*H*-indole **1a** (80 mg, 0.5 mmol) and pyrrolylacetylene **2g** (147 mg, 0.5 mmol). Brownish gum; 93 mg (yield 41% – procedure B); <sup>1</sup>H NMR (400.1 MHz, CDCl<sub>3</sub>) δ 7.99–7.96 (m, 2 H, H<sub>o</sub>), 7.80 (s, 1 H, H-1), 7.45–7.44 (m, 3 H, H<sub>m,p</sub>), 7.39 (nr m, 2 H, H-8, H-9), 7.21–7.17 (m, 2 H, H-6, H-7), 6.62 (s, 1 H, =CH), 2.78–2.70 (m, 2 H, H-4, Bu), 2.47 (t, *J* = 7.6 Hz, 2 H, H-3, Pr), 1.75–1.69 (m, 2 H, H-2, Pr), 1.67 (br s, 6 H, Me-4a, Me-5), 1.62–1.59 (m, 2 H, H-3, Bu), 1.53–1.46 (m, 2 H, H-2, Bu), 1.02 (t, *J* = 7.6 Hz, 3 H, H-1, Pr), 1.00 (t, *J* = 7.6 Hz, 3 H, H-1, Bu), 0.86 (s, 3 H, Me-5) ppm; <sup>13</sup>C NMR (100.6 MHz, CDCl<sub>3</sub>) δ 187.7 (C=O), 148.6 (C-11), 145.0 (C-5a), 141.8 (C<sub>i</sub>), 139.9 (C-9a), 131.0 (C-3), 130.7 (C<sub>p</sub>), 130.6 (C-2), 128.3 (3×C, C<sub>m</sub>; C-8), 127.6 (C<sub>o</sub>, Ph), 124.8 (C-7), 123.0 (C-6), 117.3 (C-9), 113.8 (C-1), 93.0 (C-4a), 88.3 (=CH), 47.9 (C-5), 32.7 (C-3, Bu), 28.8 (C-3, Pr), 26.5 (C-4, Bu), 26.4 (Me-5), 24.0 (Me-4a), 23.6 (C-2, Pr), 23.2 (C-2, Bu), 20.8 (Me-5), 14.3 (C-1, Pr), 13.9 (C-1, Bu) ppm; <sup>15</sup>N NMR (40.6 MHz, CDCl<sub>3</sub>) δ –240.9 (N-10), –200.6 (N-4) ppm; IR (film): ν = 1641 (C=O), 1534 (C=C) cm<sup>-1</sup>; MS (EI) *m/z*: 452 (19) [M]<sup>+</sup>, 437 (15) [M – Me]<sup>+</sup>, 347 (77) [M – PhCO]<sup>+</sup>, 105 (100) [PhCO]<sup>+</sup>, 77 (42) [Ph]<sup>+</sup>; HRMS (ESI-TOF) *m/z* [M+H]<sup>+</sup> calcd for C<sub>31</sub>H<sub>37</sub>N<sub>2</sub>O<sup>+</sup>: 453.2906, found: 453.2903.

**Ethyl (2E)-2-(14a,15,15-trimethyl-10,11,12,13,14a,15-hexahydro-8H-benzo[e]imidazo[1,2-a:3,4-a']diindol-8-ylidene)ethanoate (3w).**

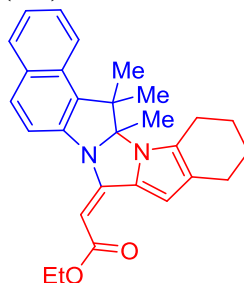

Obtained from 3*H*-indole **1h** (105 mg, 0.5 mmol) and pyrrolylacetylene **2h** (109 mg, 0.5 mmol). Pale yellow solid; 98 mg (yield 46% – procedure B); mp 181–182 °C (CHCl<sub>3</sub>/hexane); <sup>1</sup>H NMR (400.1 MHz, CDCl<sub>3</sub>) δ 8.07 (d, *J* = 8.6 Hz, 1 H, H-1), 7.89 (d, *J* = 8.2 Hz, 1 H, H-4), 7.85 (d, *J* = 8.7 Hz, 1 H, H-5), 7.55 (d, *J* = 8.7 Hz, 1 H, H-6), 7.49 (t, *J* = 7.6 Hz, 1 H, H-2), 7.41 (t, *J* = 7.4 Hz, 1 H, H-3), 7.28 (s, 1 H, H-9), 5.56 (s, 1 H, =CH), 4.19 (dq, *J* = 7.1, 1.7 Hz, 2 H, OCH<sub>2</sub>), 2.88–2.82 (m, 2 H, H-10), 2.66 (nr m, 2 H, H-13), 1.99 (s, 3 H, Me-15), 1.98–1.93 (m, 2 H, H-11), 1.86–1.76 (m, 2 H, H-12), 1.71 (s, 3 H, Me-14a), 1.30 (t, *J* = 7.1 Hz, 3 H, MeCH<sub>2</sub>), 1.09 (s, 3 H, Me-15) ppm; <sup>13</sup>C NMR (100.6 MHz, CDCl<sub>3</sub>) δ 168.1 (C=O), 148.8 (C-8), 138.4 (C-15a), 135.9 (C-6a), 131.9 (C-8a), 130.8 (C-4a), 130.2 (C-15b), 129.8 (C-4), 129.4 (C-5), 127.8 (C-2), 127.7 (C-13a), 125.2 (C-9a), 124.3 (C-3), 122.3 (C-1), 117.6 (C-6), 110.5 (C-9), 92.6 (C-14a), 81.1 (=CH), 58.9 (CH<sub>2</sub>O), 49.6 (C-15), 25.3 (Me-15), 24.1 (C-13), 23.7 (C-10), 23.4, 23.3 (C-11, C-12), 22.9 (Me-14a), 22.3 (Me-15), 14.8 (MeCH<sub>2</sub>) ppm; <sup>15</sup>N NMR (40.6 MHz, CDCl<sub>3</sub>) δ –203.9 (N-14), –247.1 (N-7) ppm; IR (film): ν = 1694 (C=O), 1518 (C=C) cm<sup>-1</sup>; MS (EI) *m/z*: 427 (19), 426 (75) [M]<sup>+</sup>, 411 (100) [M – Me]<sup>+</sup>, 353 (41) [M – CO<sub>2</sub>Et]<sup>+</sup>, 338 (21), 194 (37), 169 (25), 161 (22), 148 (21); HRMS (ESI-TOF) *m/z* [M+H]<sup>+</sup> calcd for C<sub>28</sub>H<sub>31</sub>N<sub>2</sub>O<sub>2</sub><sup>+</sup>: 427.2386, found: 427.2387.

## 5. NMR spectra for products

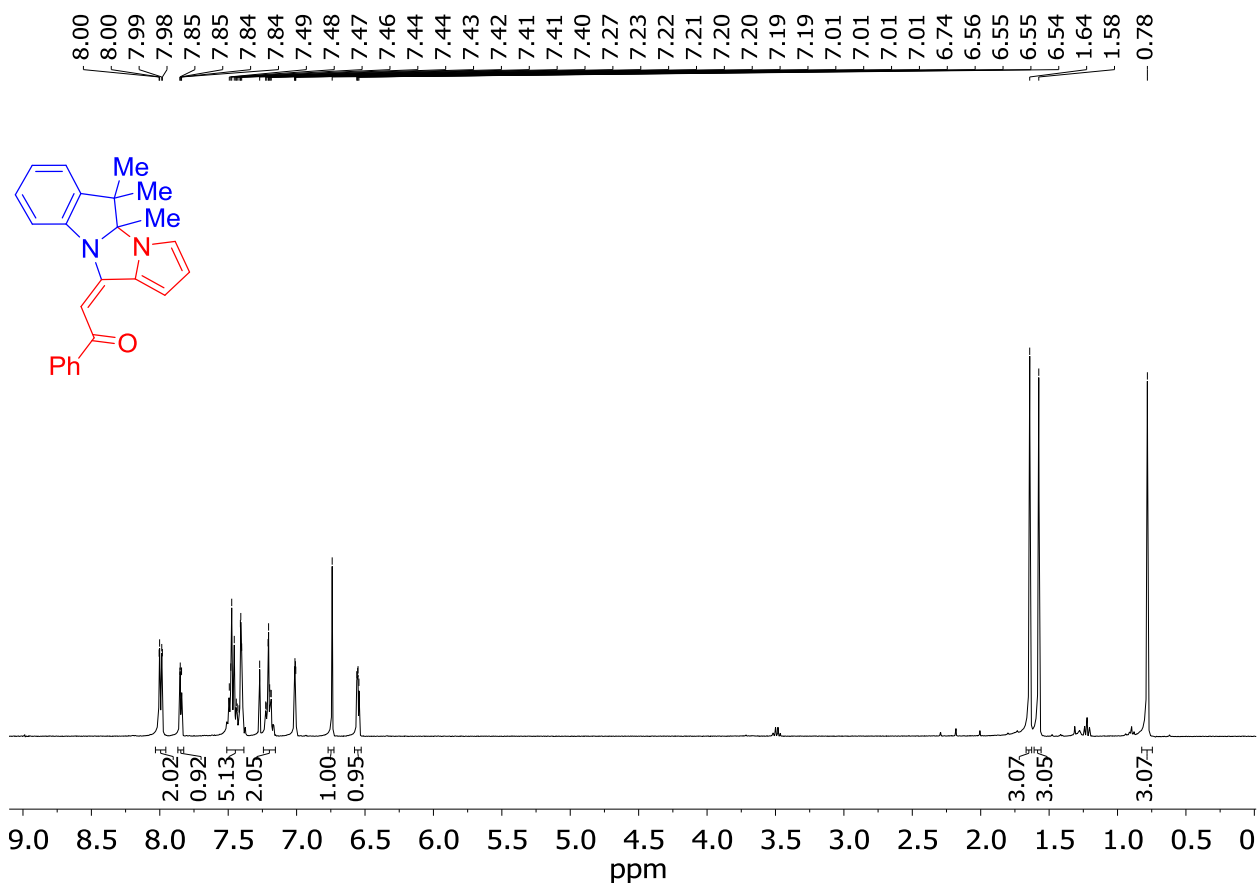

<sup>1</sup>H NMR Spectrum of **3a** (400.13 MHz, CDCl<sub>3</sub>)

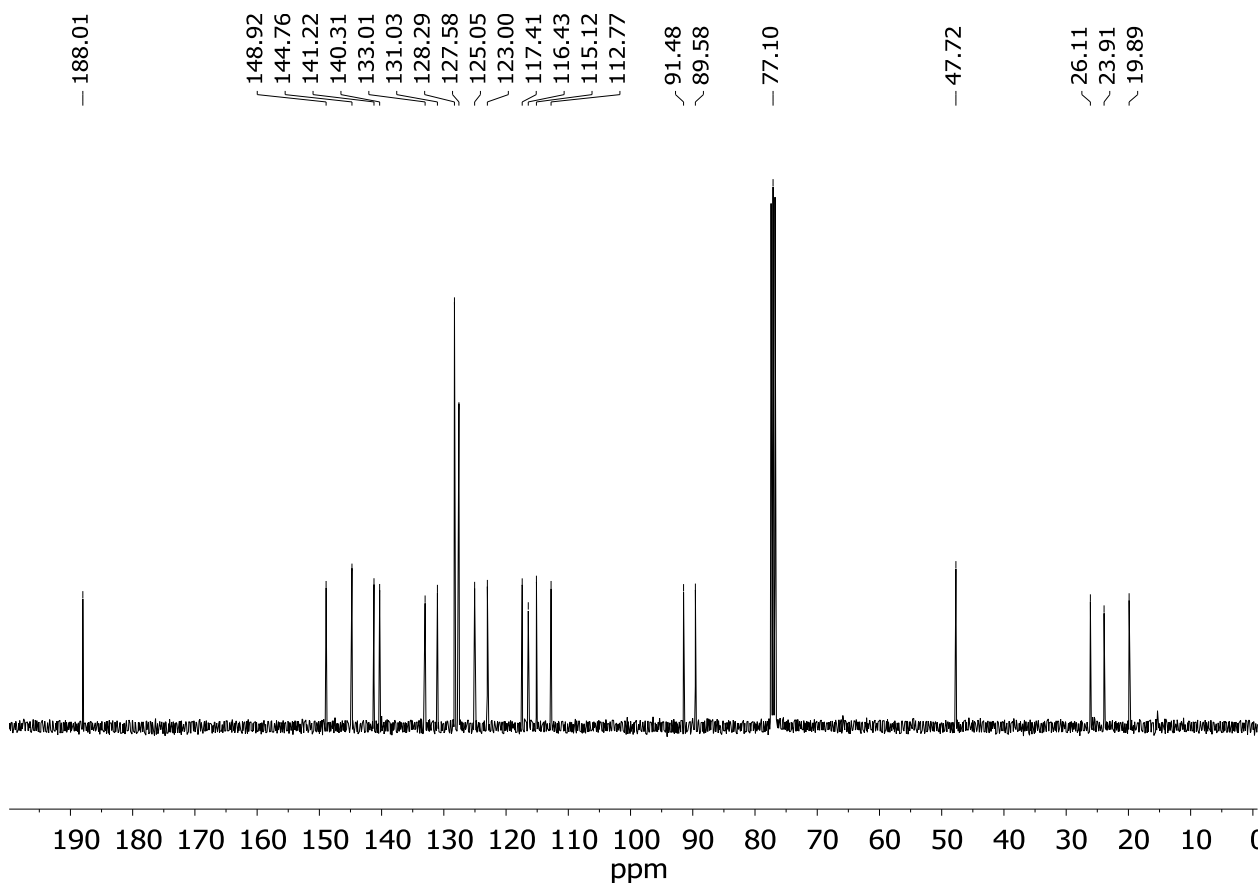

<sup>13</sup>C NMR Spectrum of **3a** (100.62 MHz, CDCl<sub>3</sub>)

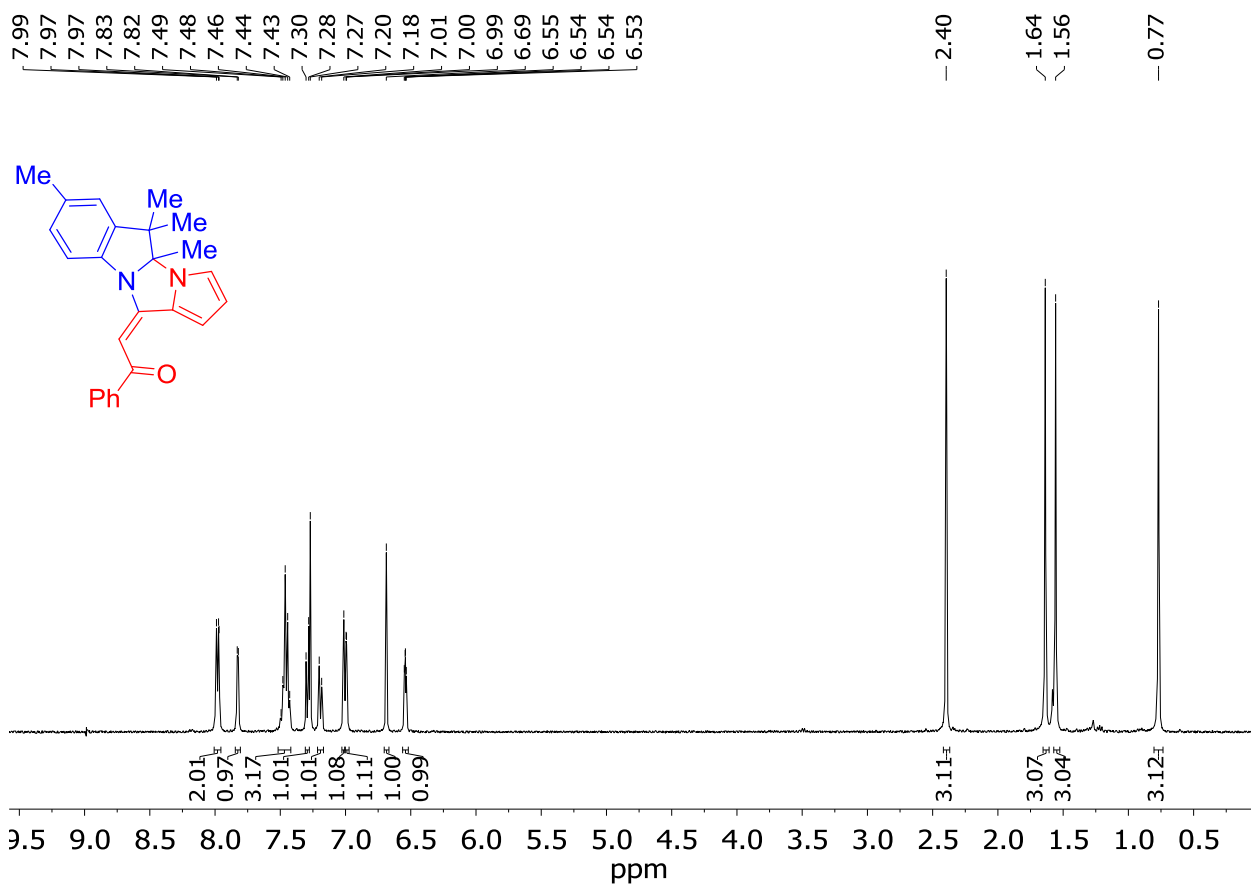

<sup>1</sup>H NMR Spectrum of **3b** (400.13 MHz, CDCl<sub>3</sub>)

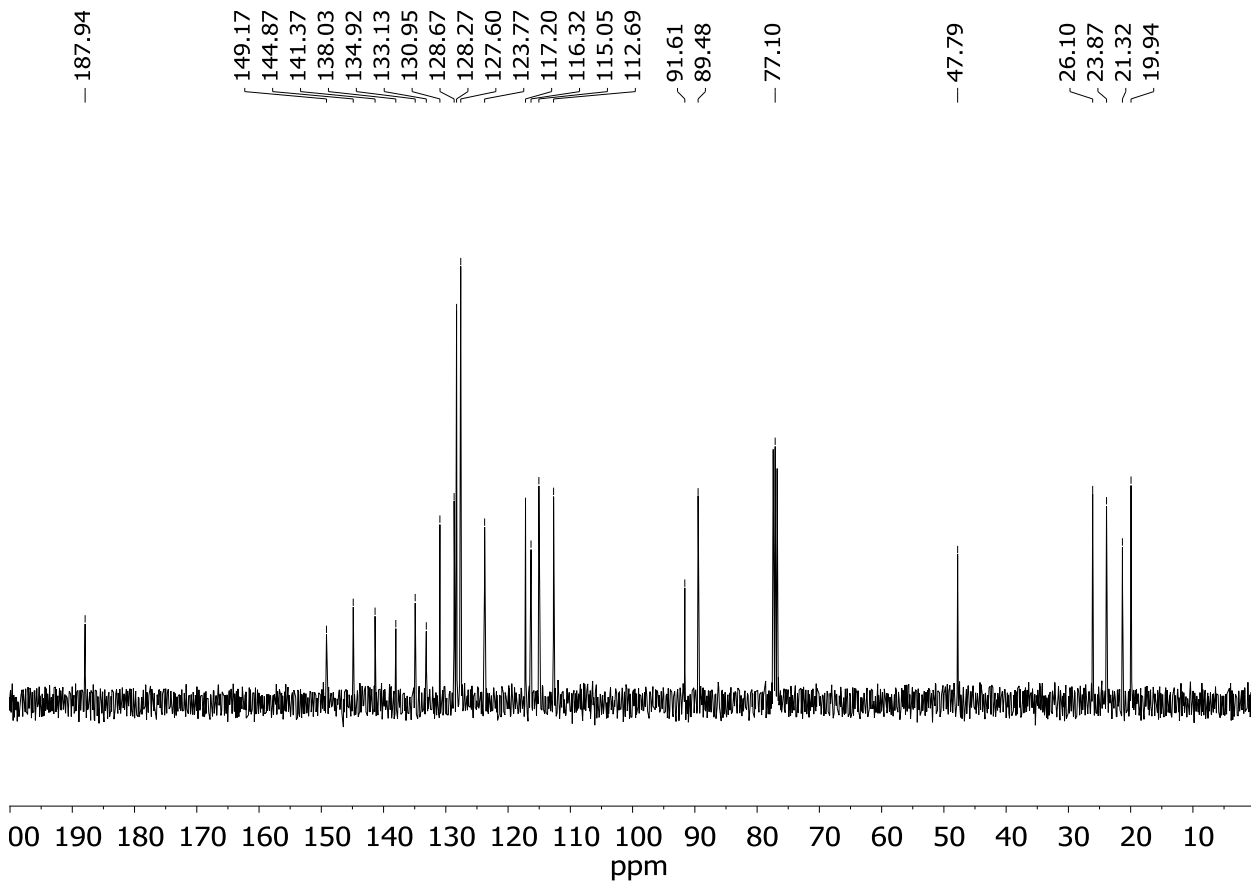

<sup>13</sup>C NMR Spectrum of **3b** (100.62 MHz, CDCl<sub>3</sub>)



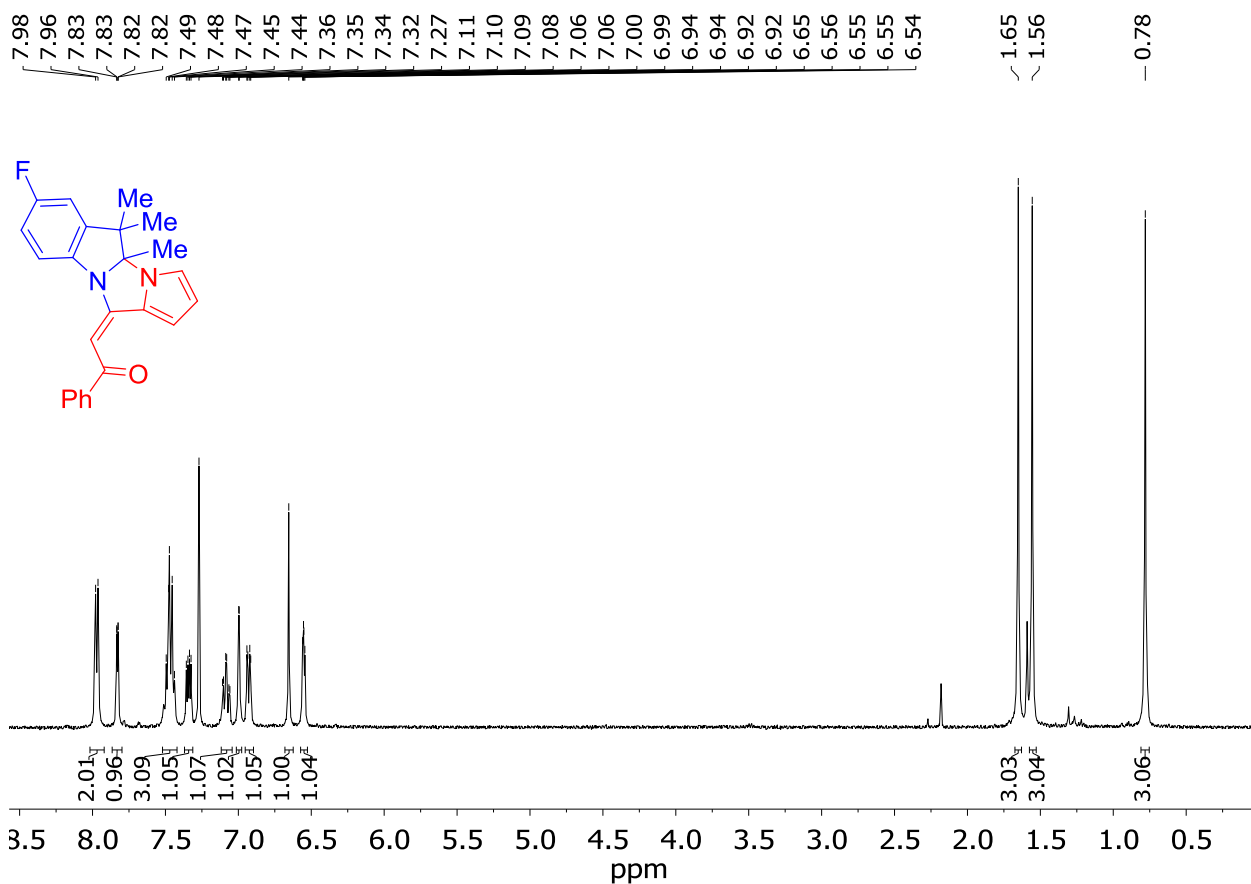

<sup>1</sup>H NMR Spectrum of 3c (100.62 MHz, CDCl<sub>3</sub>)

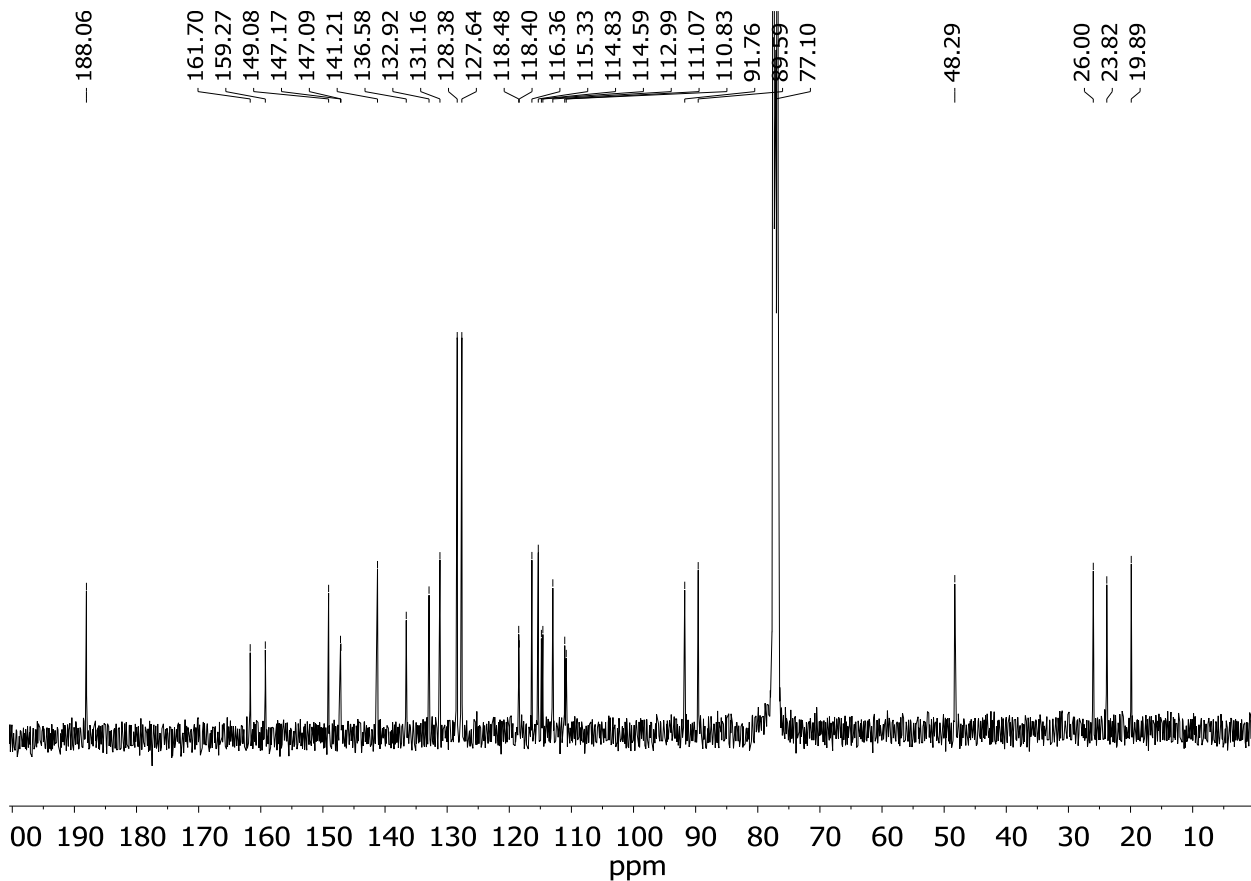

<sup>13</sup>C NMR Spectrum of 3c (100.62 MHz, CDCl<sub>3</sub>)

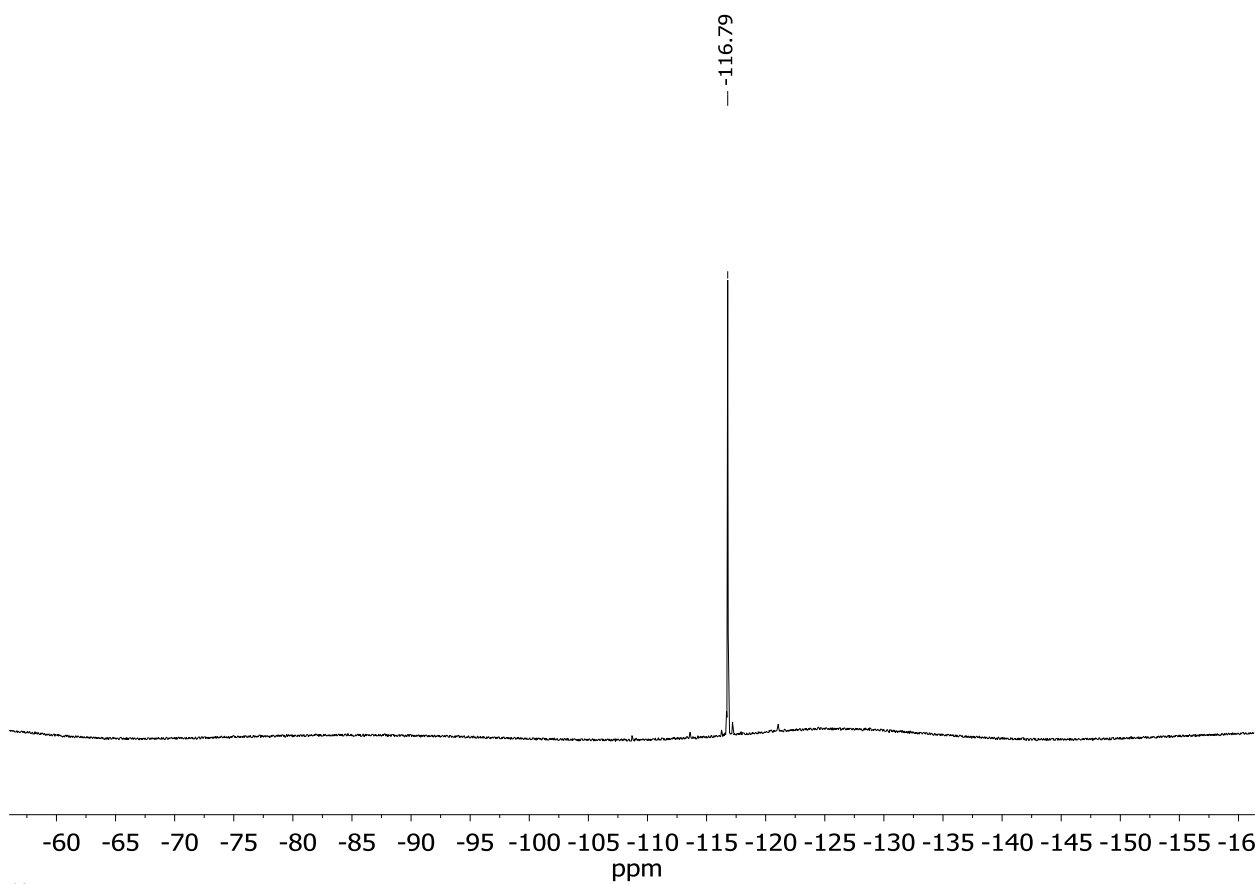

$^{19}\text{F}$  NMR Spectrum of **3c** (376.50 MHz,  $\text{CDCl}_3$ )

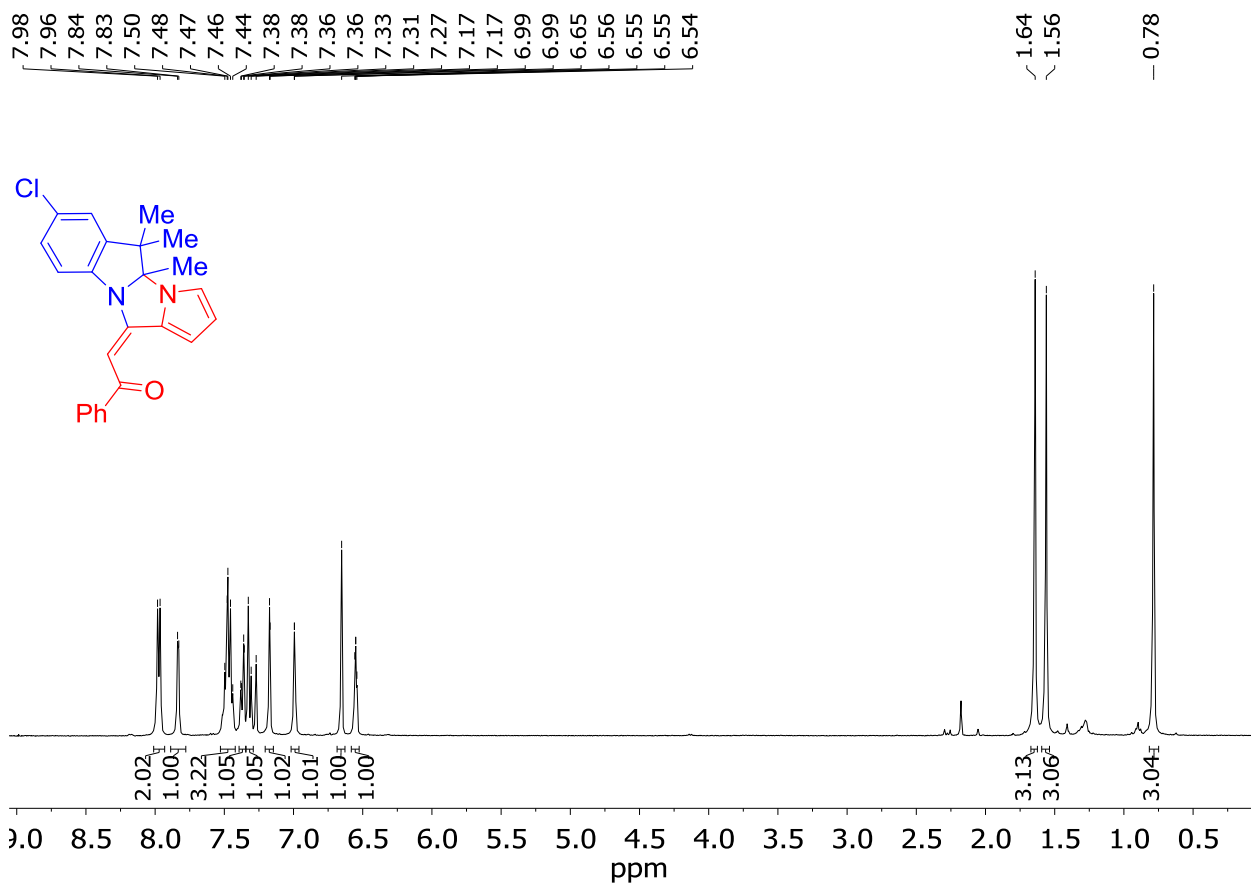

<sup>1</sup>H NMR Spectrum of **3d** (400.13 MHz, CDCl<sub>3</sub>)

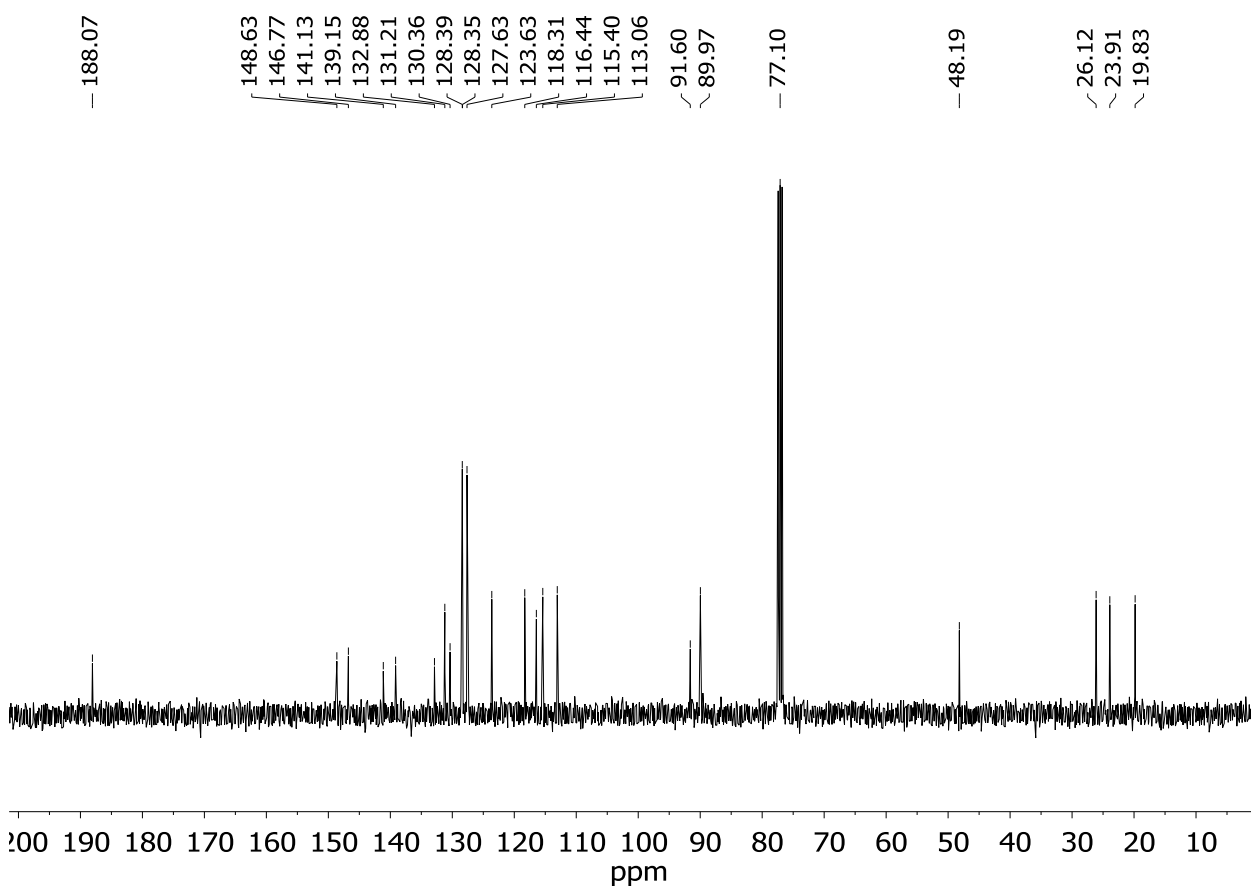

<sup>13</sup>C NMR Spectrum of **3d** (100.62 MHz, CDCl<sub>3</sub>)

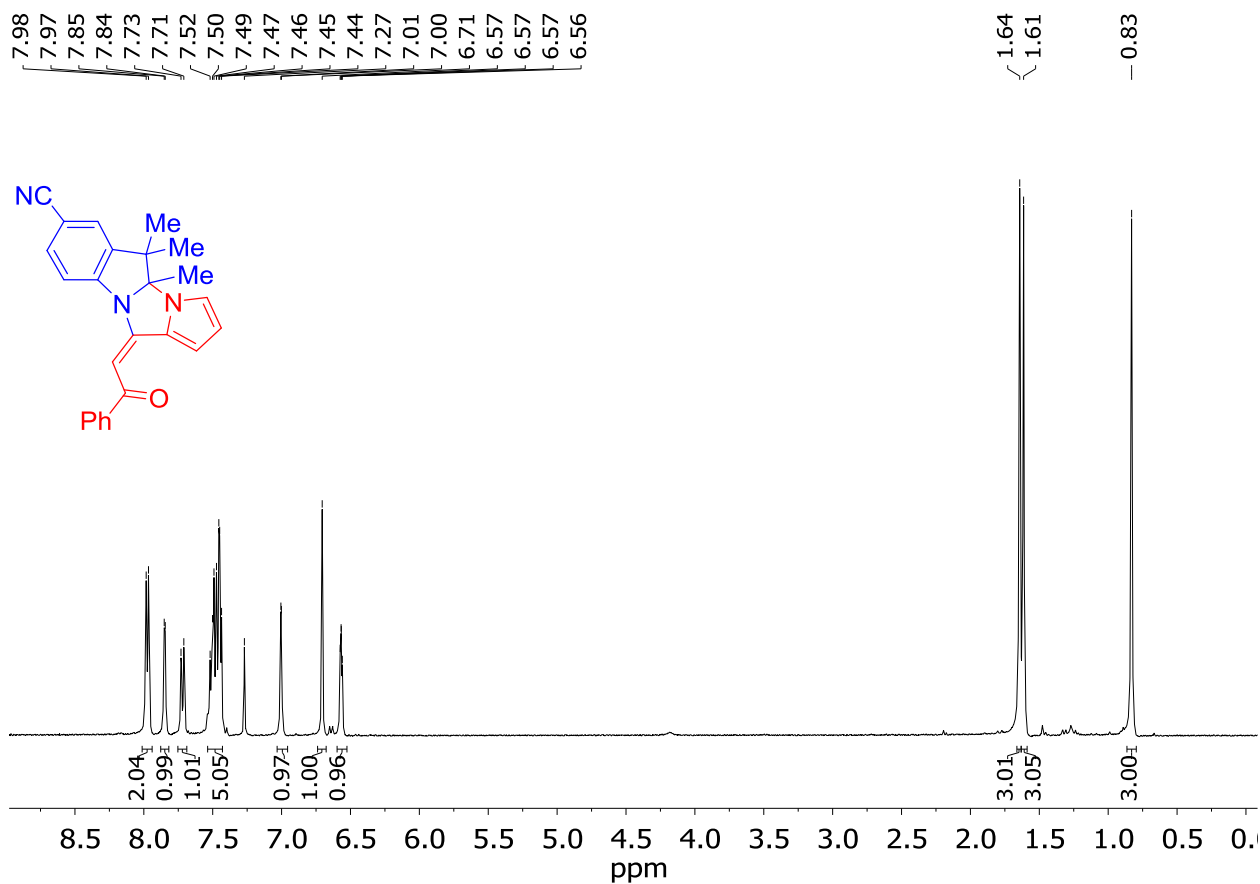

<sup>1</sup>H NMR Spectrum of **3e** (400.13 MHz, CDCl<sub>3</sub>)

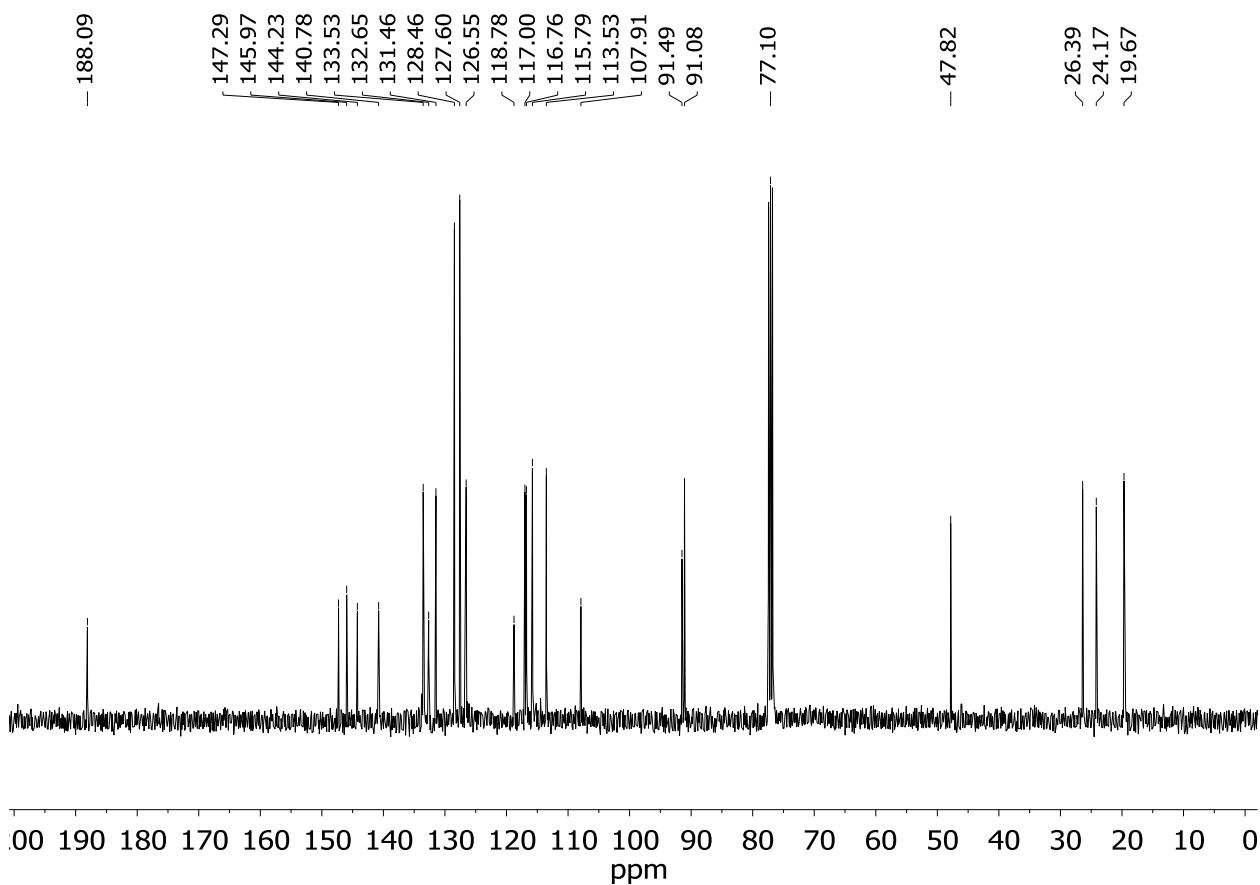

<sup>13</sup>C NMR Spectrum of **3e** (100.62 MHz, CDCl<sub>3</sub>)

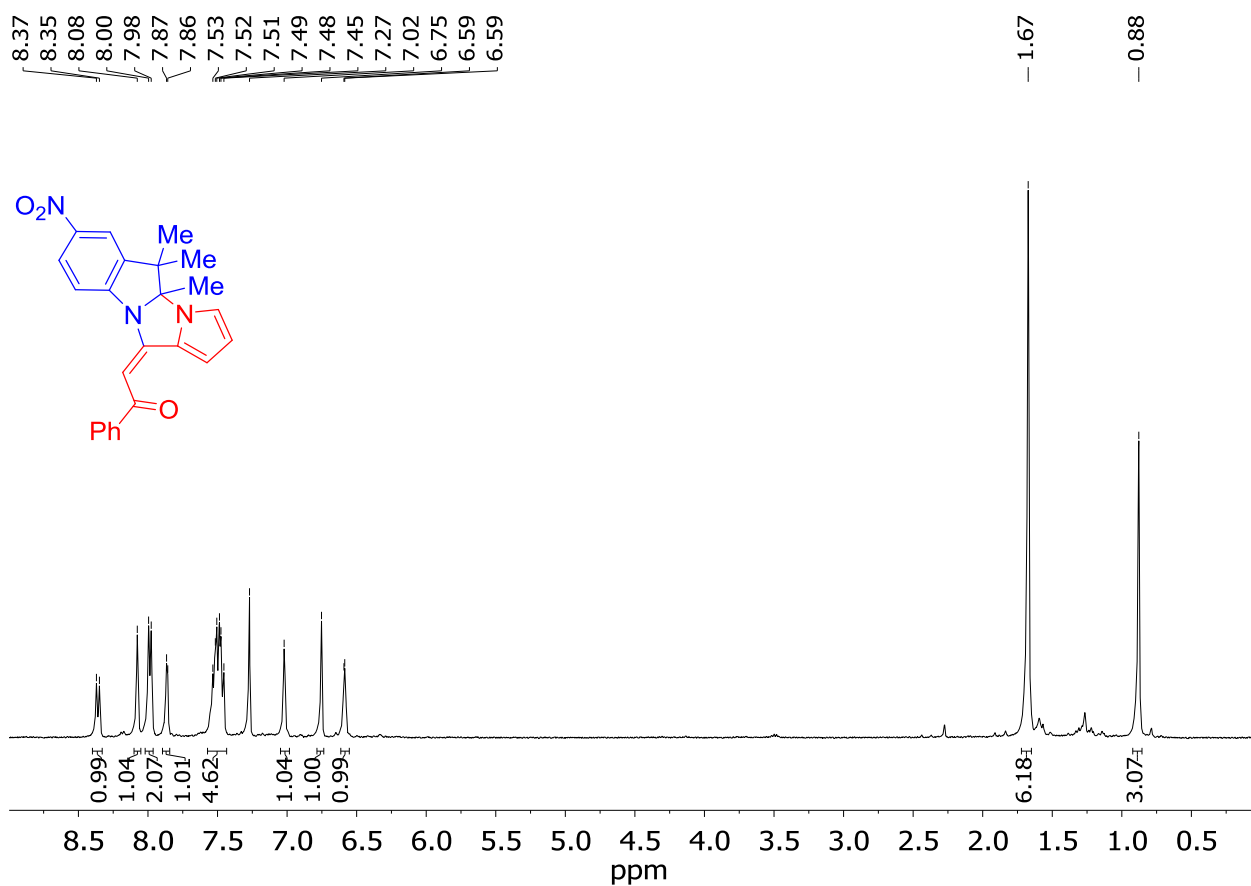

<sup>1</sup>H NMR Spectrum of **3f** (400.13 MHz, CDCl<sub>3</sub>)

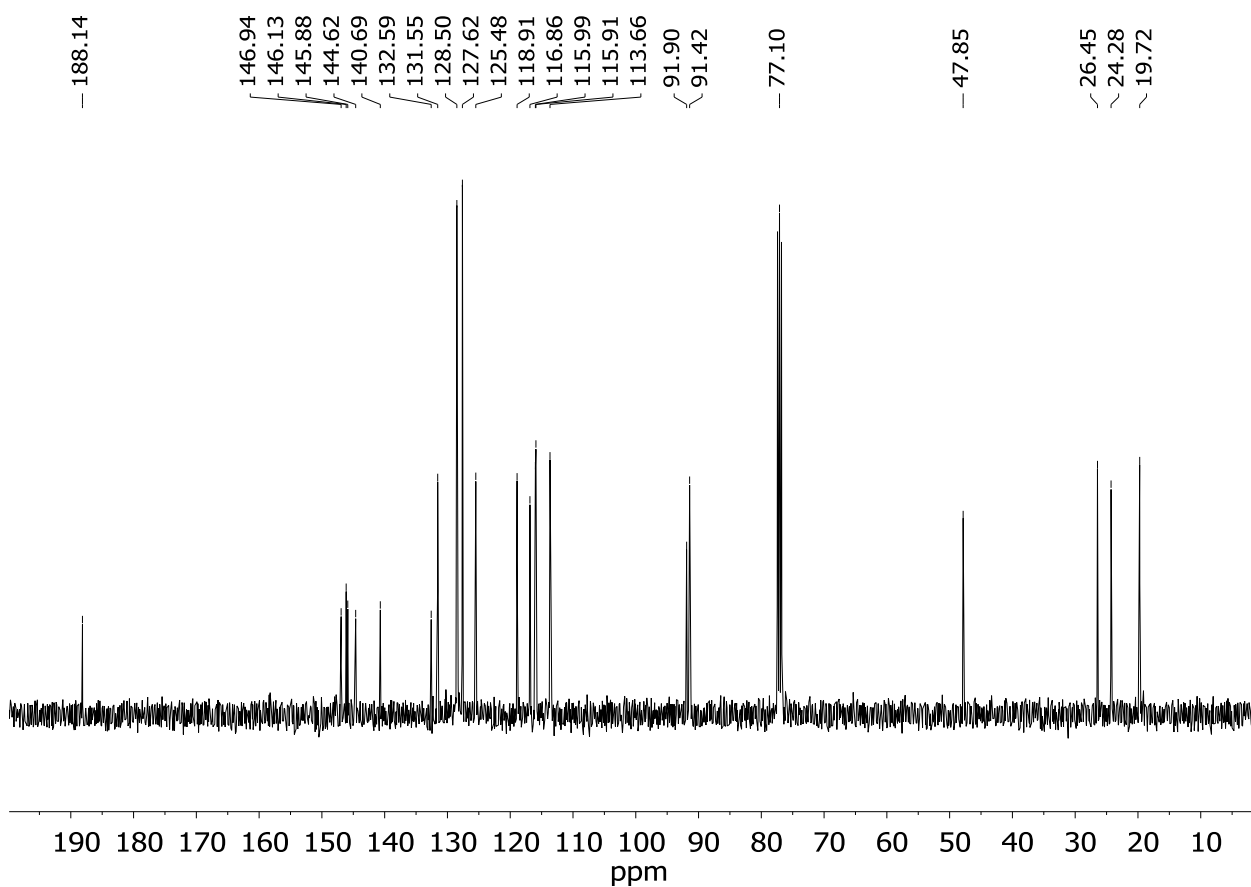

<sup>13</sup>C NMR Spectrum of **3f** (100.62 MHz, CDCl<sub>3</sub>)

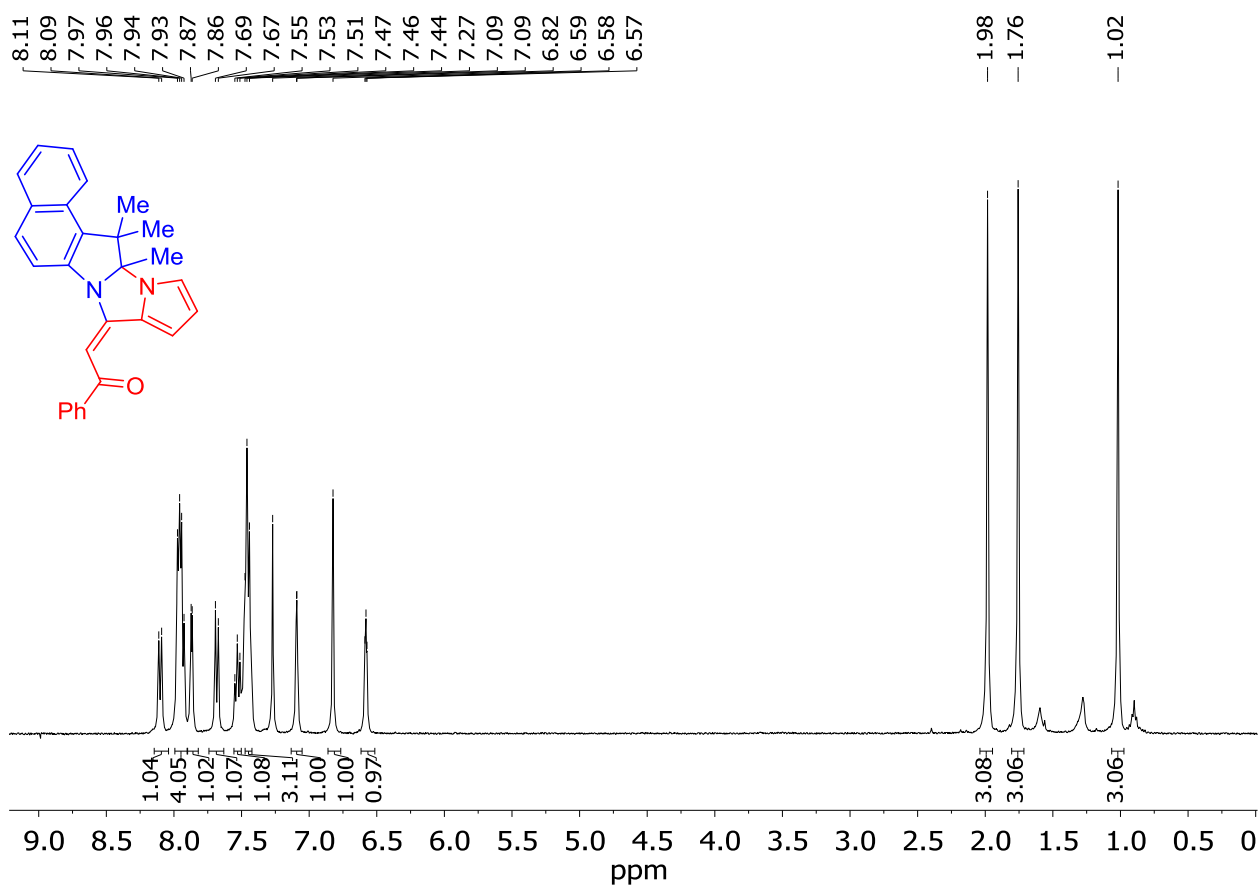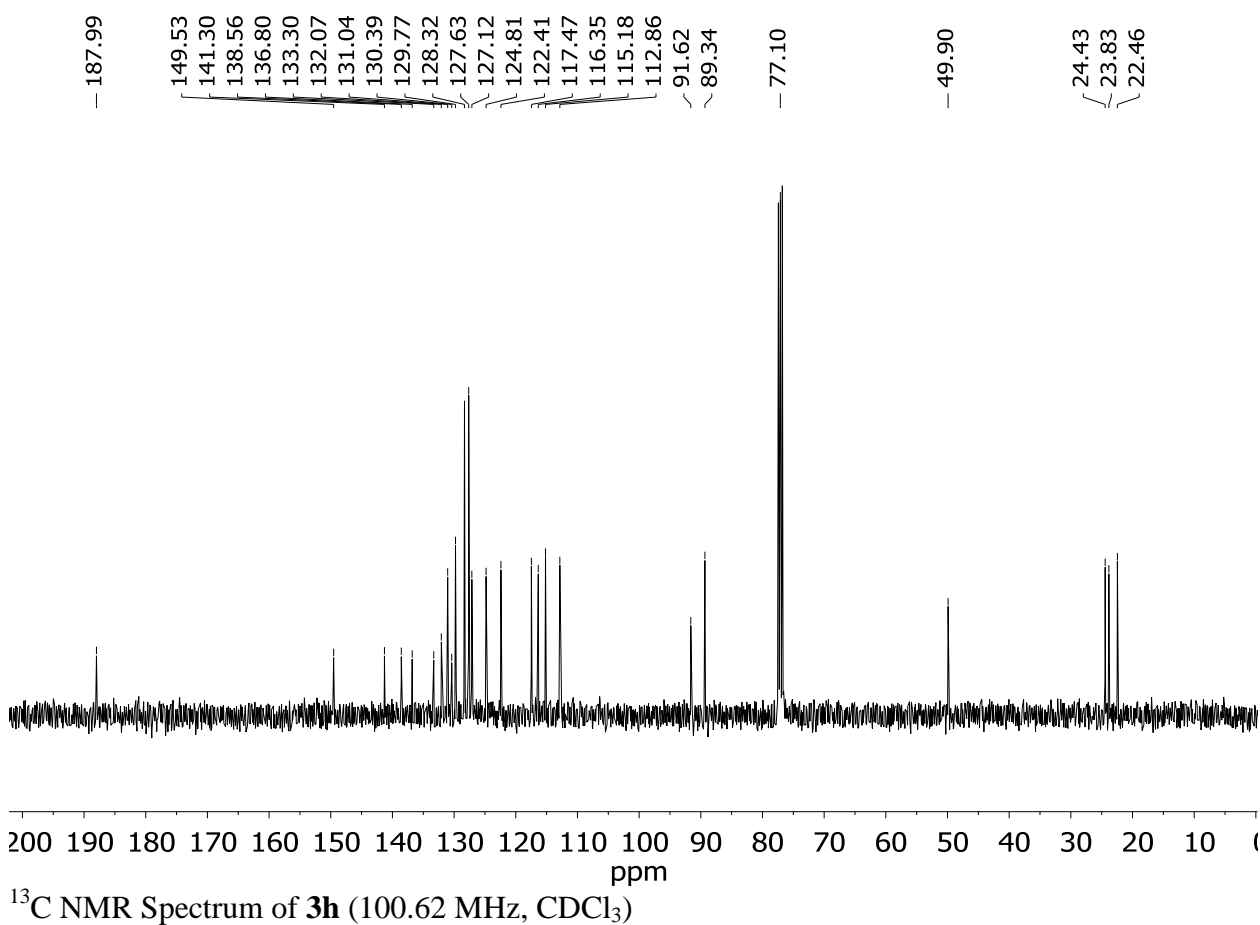

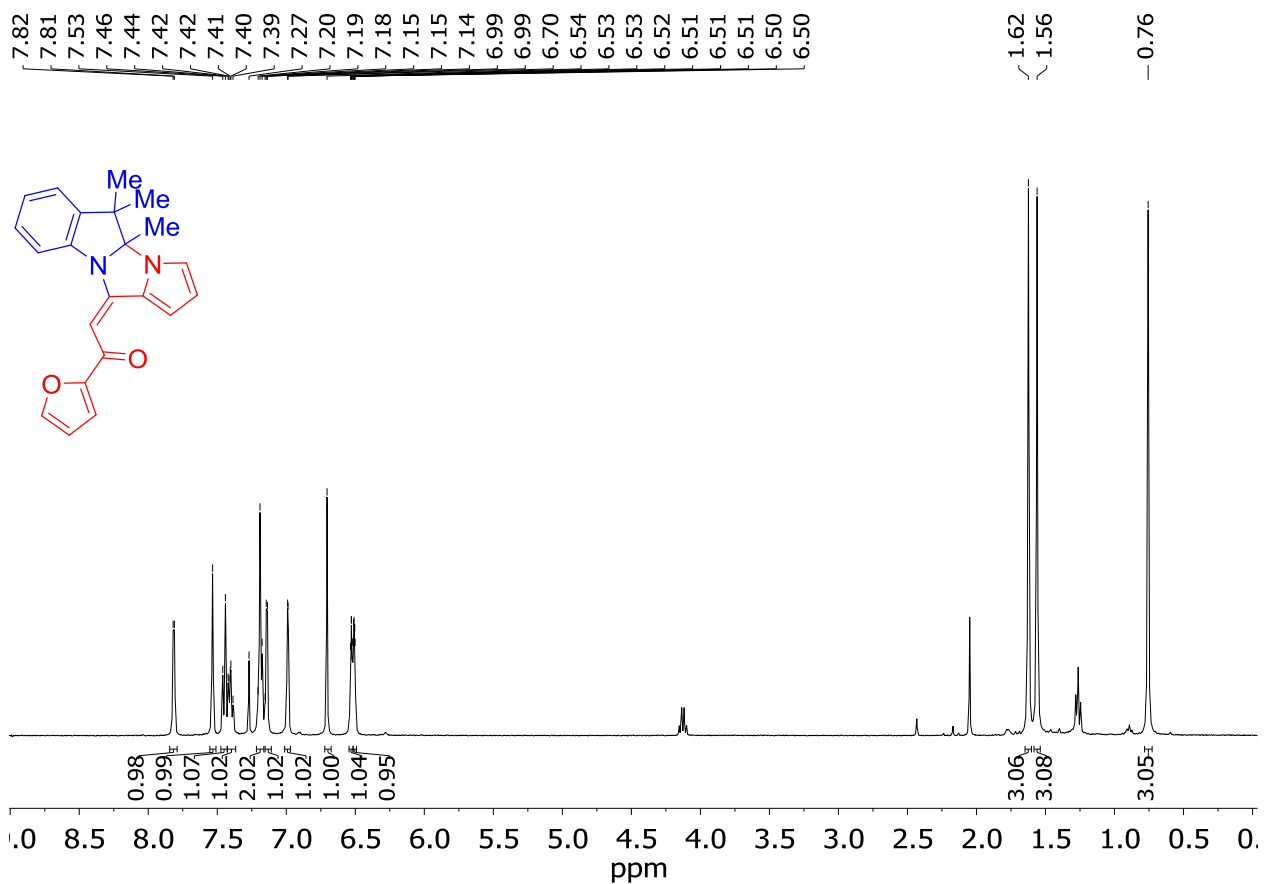

<sup>1</sup>H NMR Spectrum of **3i** (400.13 MHz, CDCl<sub>3</sub>)

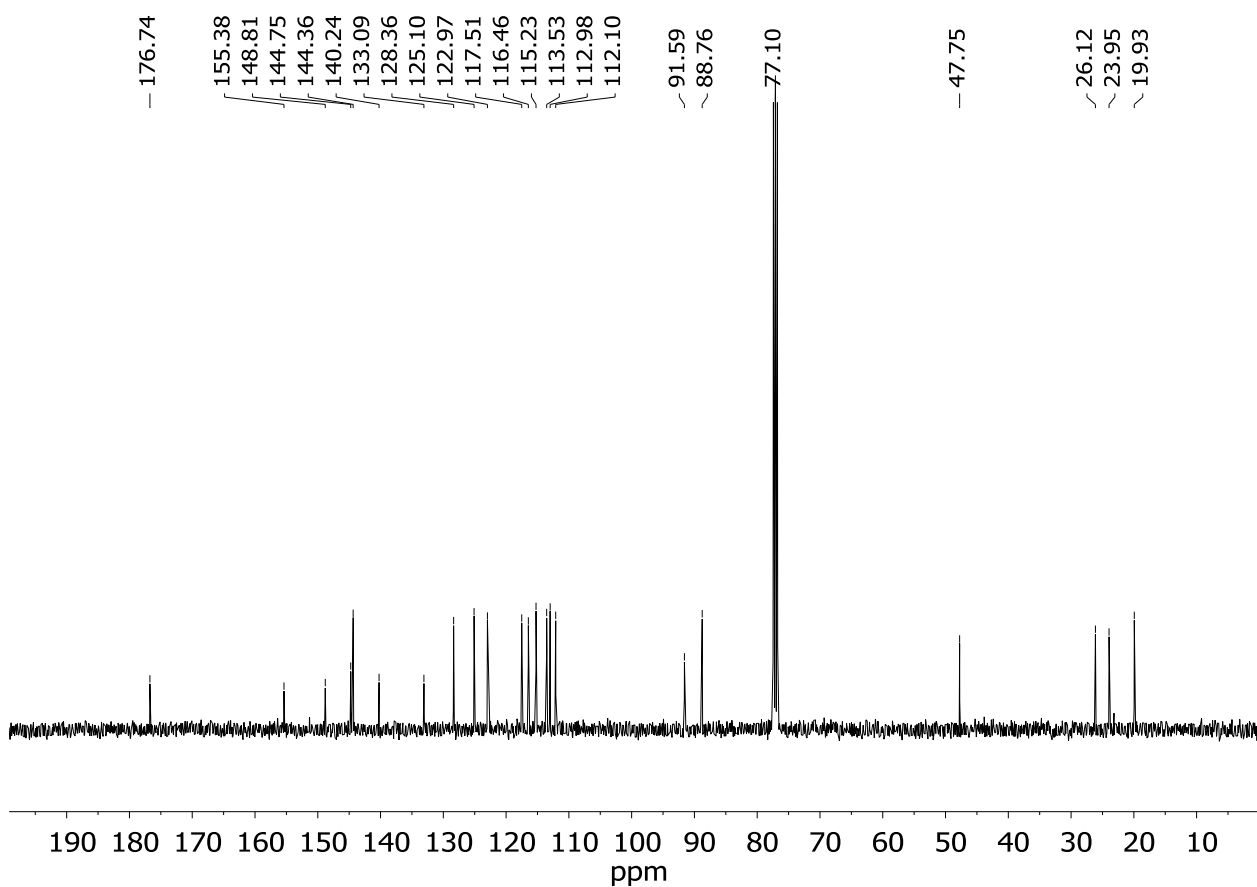

<sup>13</sup>C NMR Spectrum of **3i** (100.62 MHz, CDCl<sub>3</sub>)

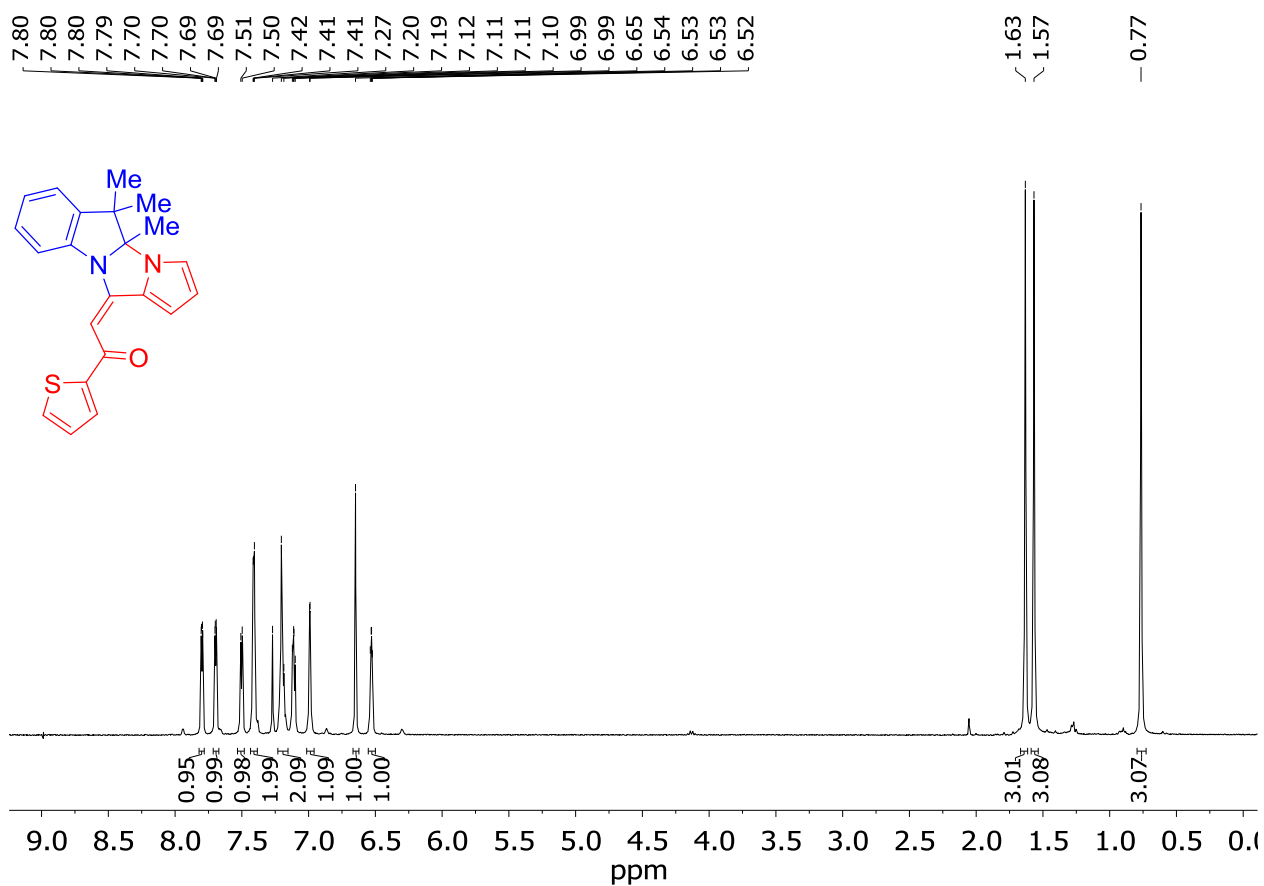

<sup>1</sup>H NMR Spectrum of **3j** (400.13 MHz, CDCl<sub>3</sub>)

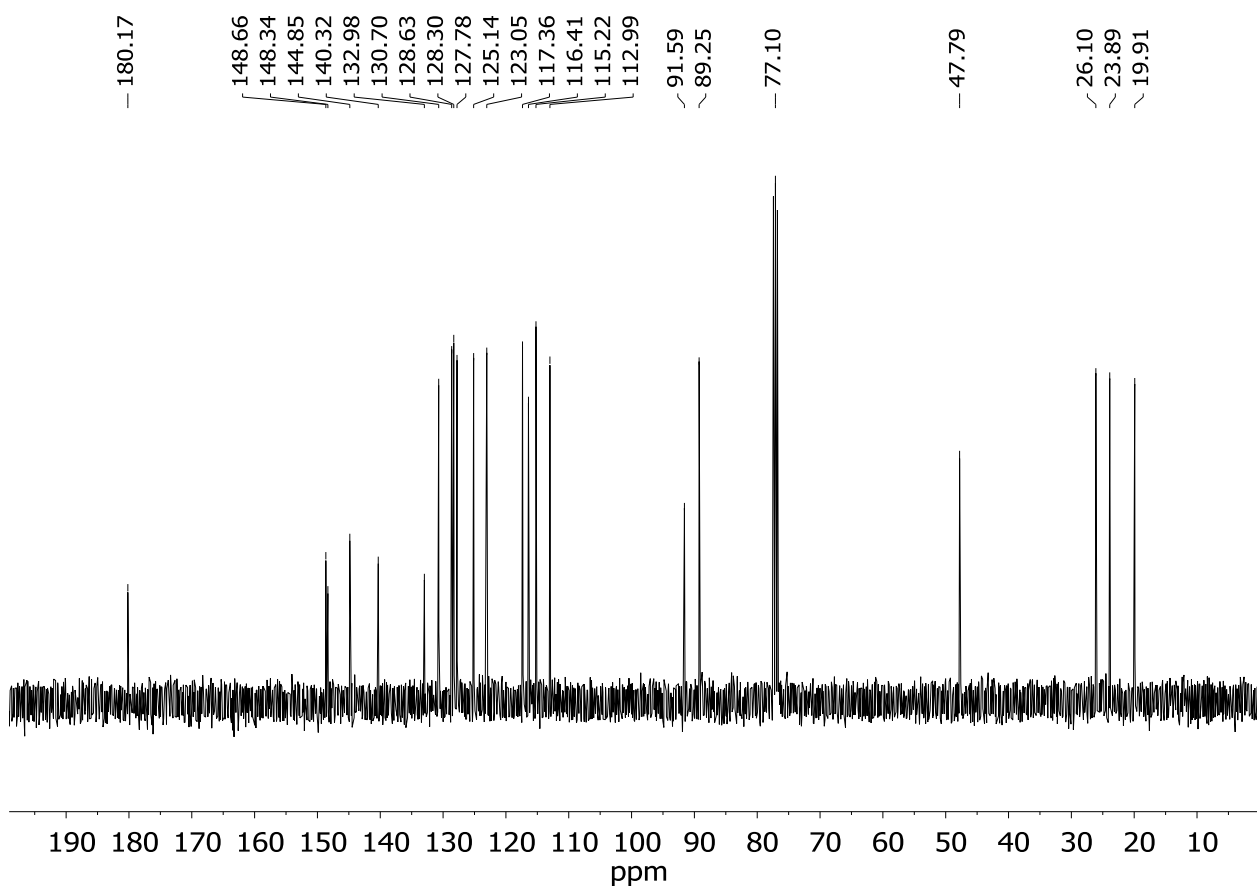

<sup>13</sup>C NMR Spectrum of **3j** (100.62 MHz, CDCl<sub>3</sub>)



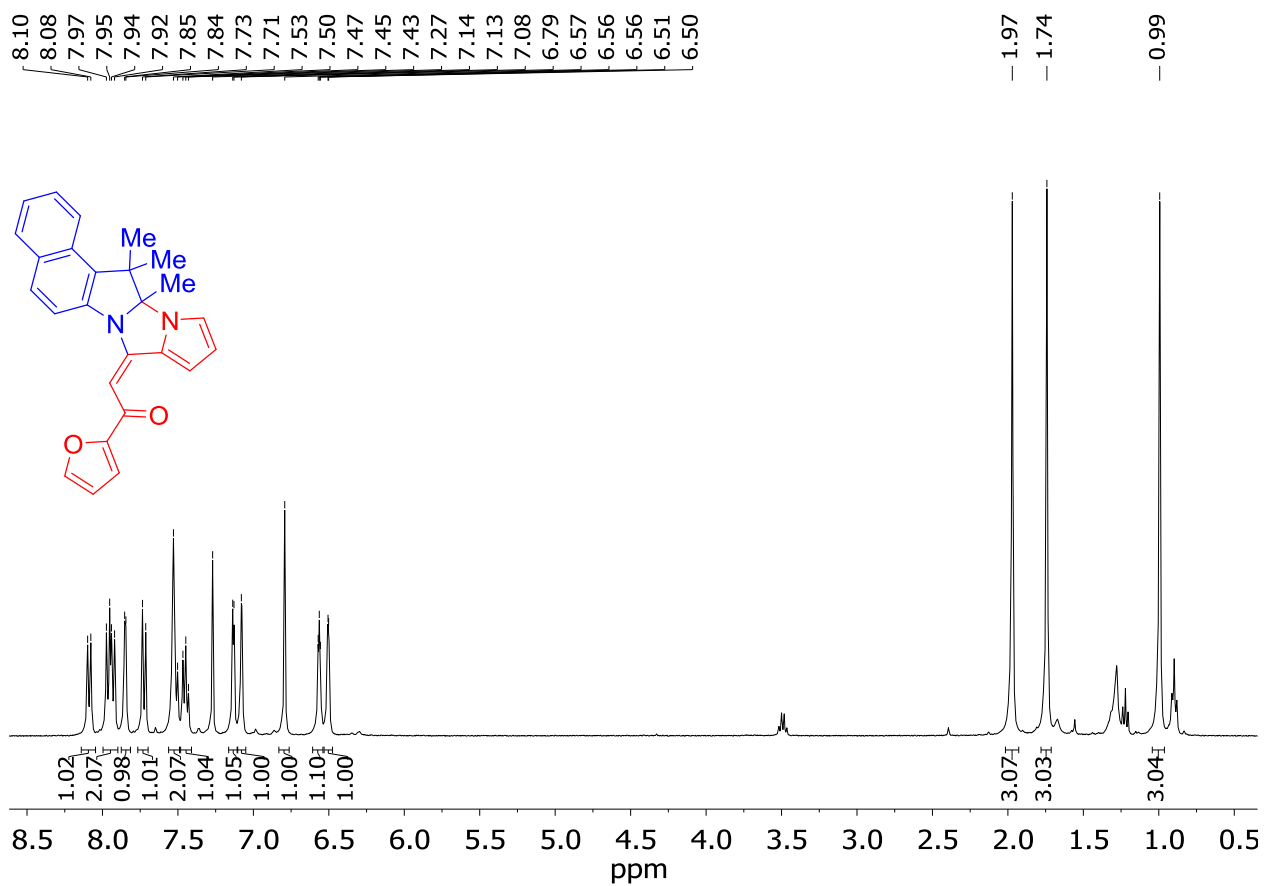

**<sup>1</sup>H NMR Spectrum of **3k** (400.13 MHz, CDCl<sub>3</sub>)**

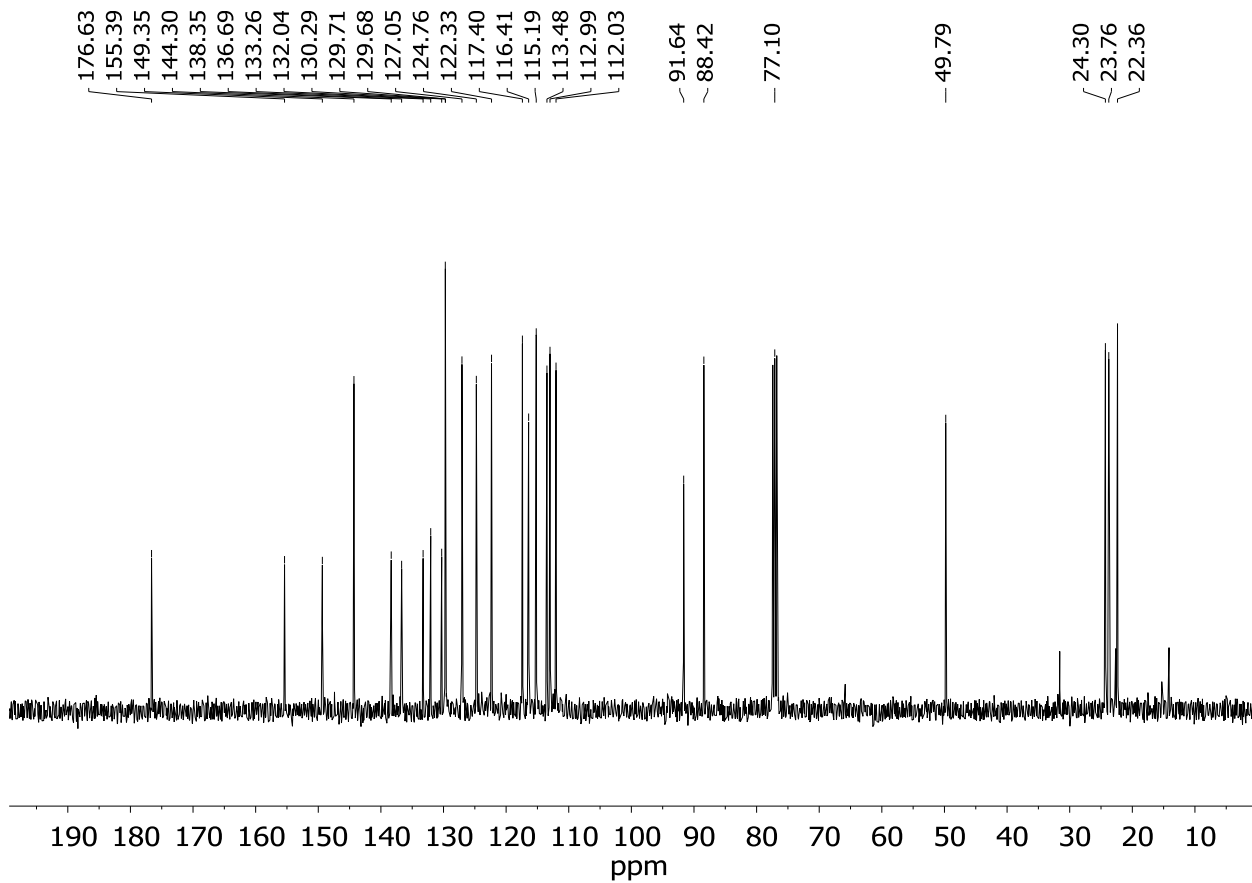

**<sup>13</sup>C NMR Spectrum of **3k** (100.62 MHz, CDCl<sub>3</sub>)**

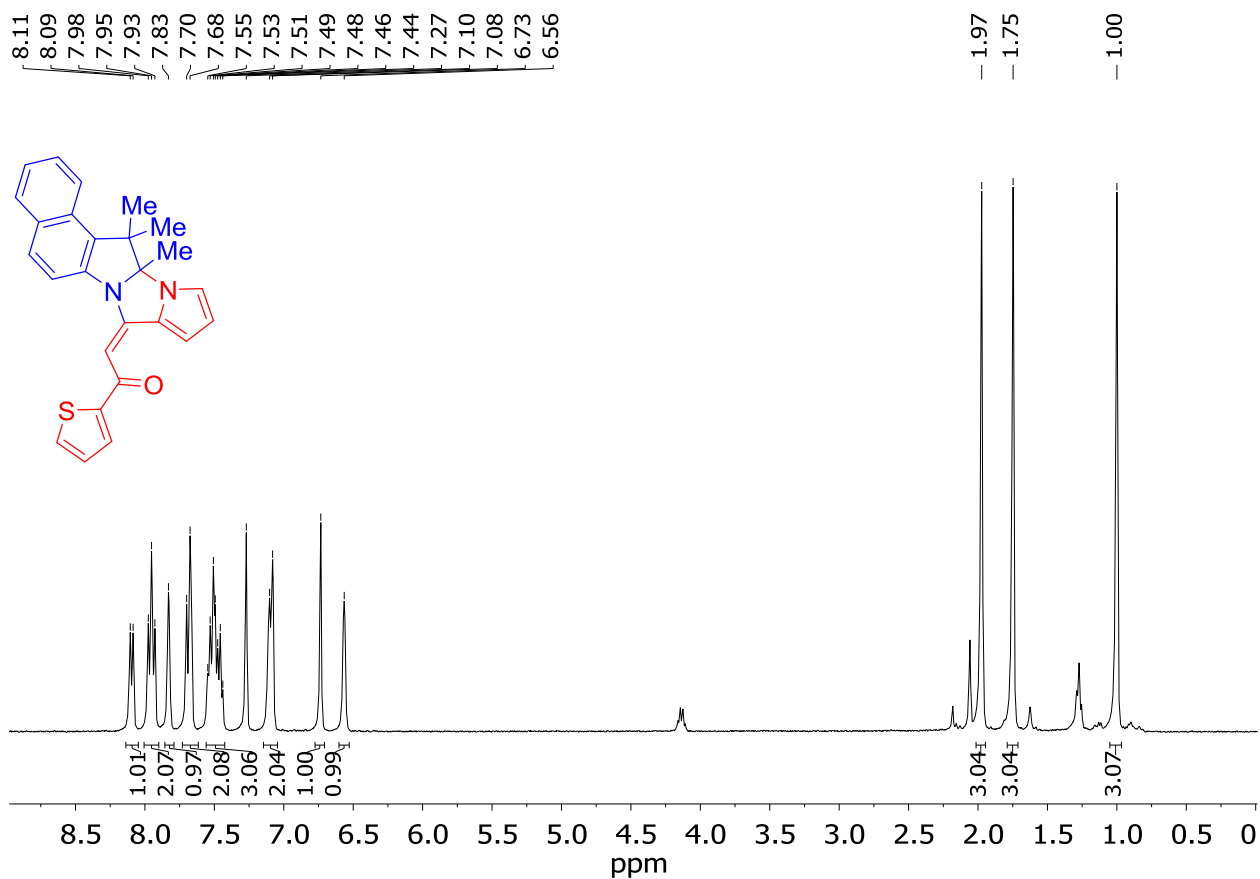

<sup>1</sup>H NMR Spectrum of **3I** (400.13 MHz, CDCl<sub>3</sub>)

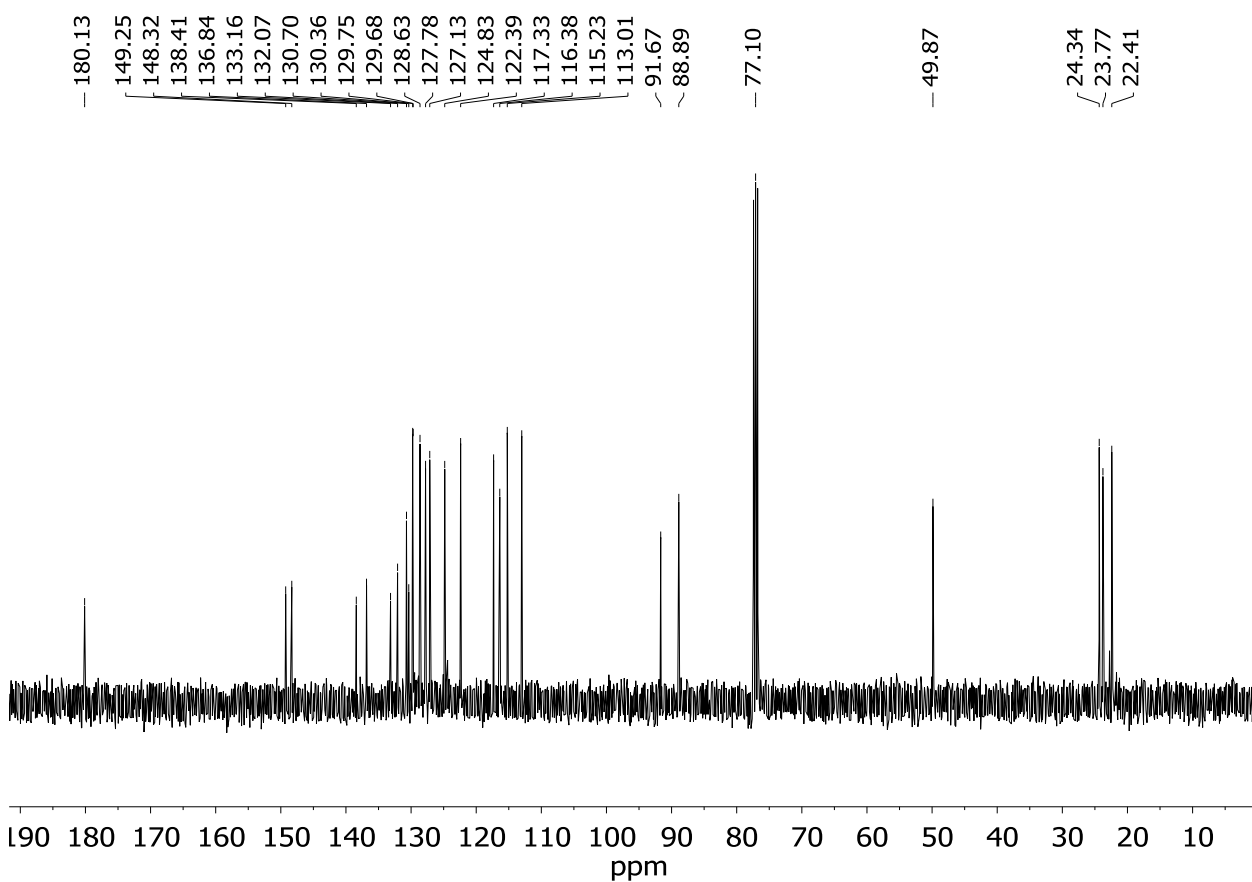

<sup>13</sup>C NMR Spectrum of **3I** (100.62 MHz, CDCl<sub>3</sub>)

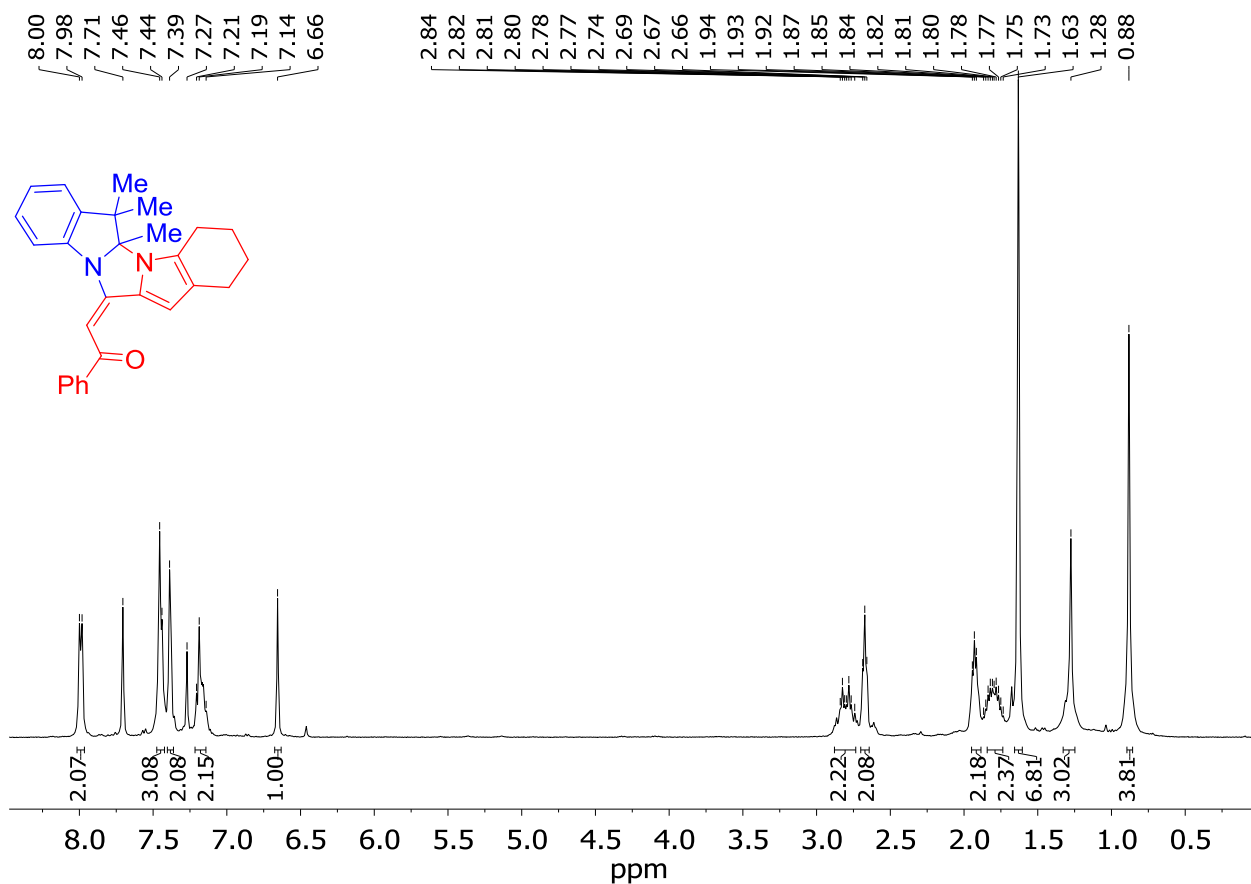

<sup>1</sup>H NMR Spectrum of **3m** (400.13 MHz, CDCl<sub>3</sub>)

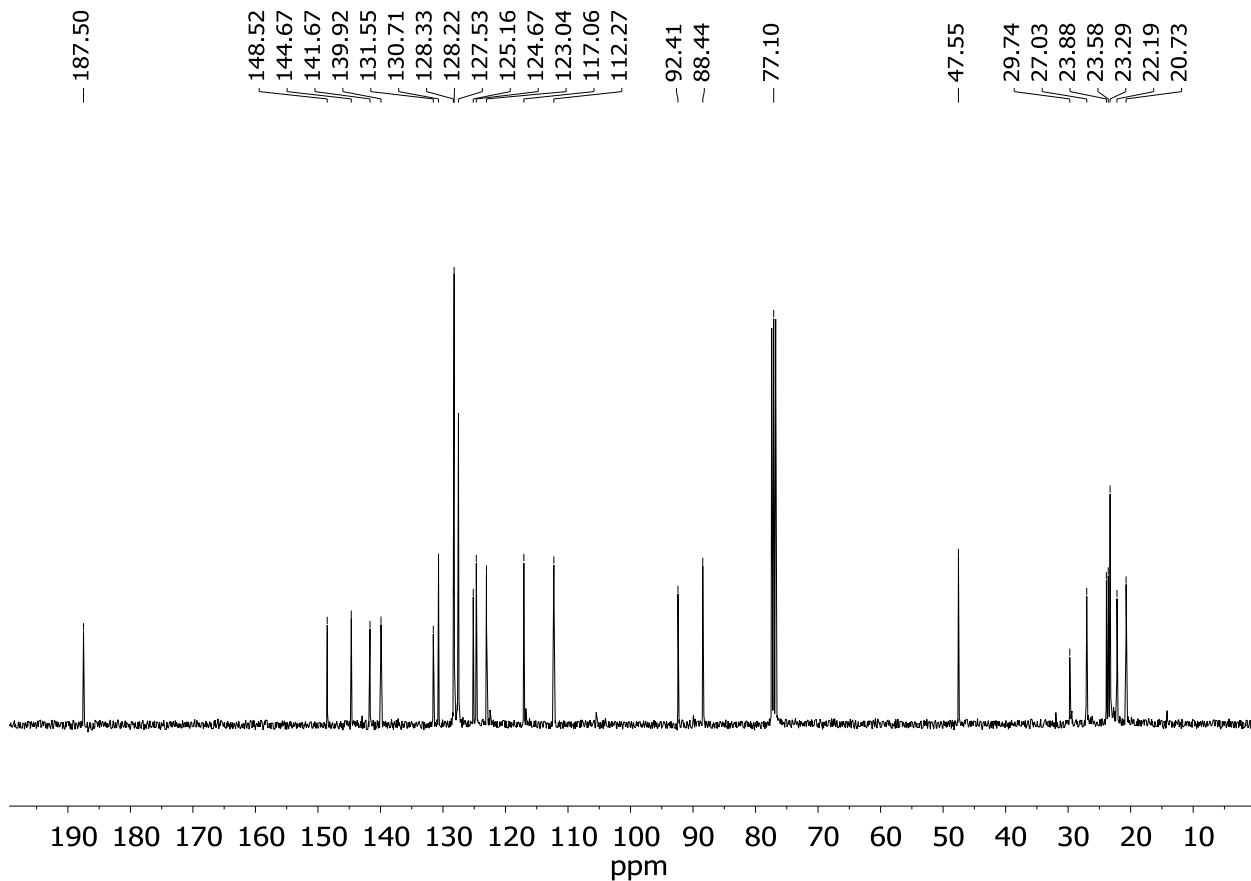

<sup>13</sup>C NMR Spectrum of **3m** (100.62 MHz, CDCl<sub>3</sub>)

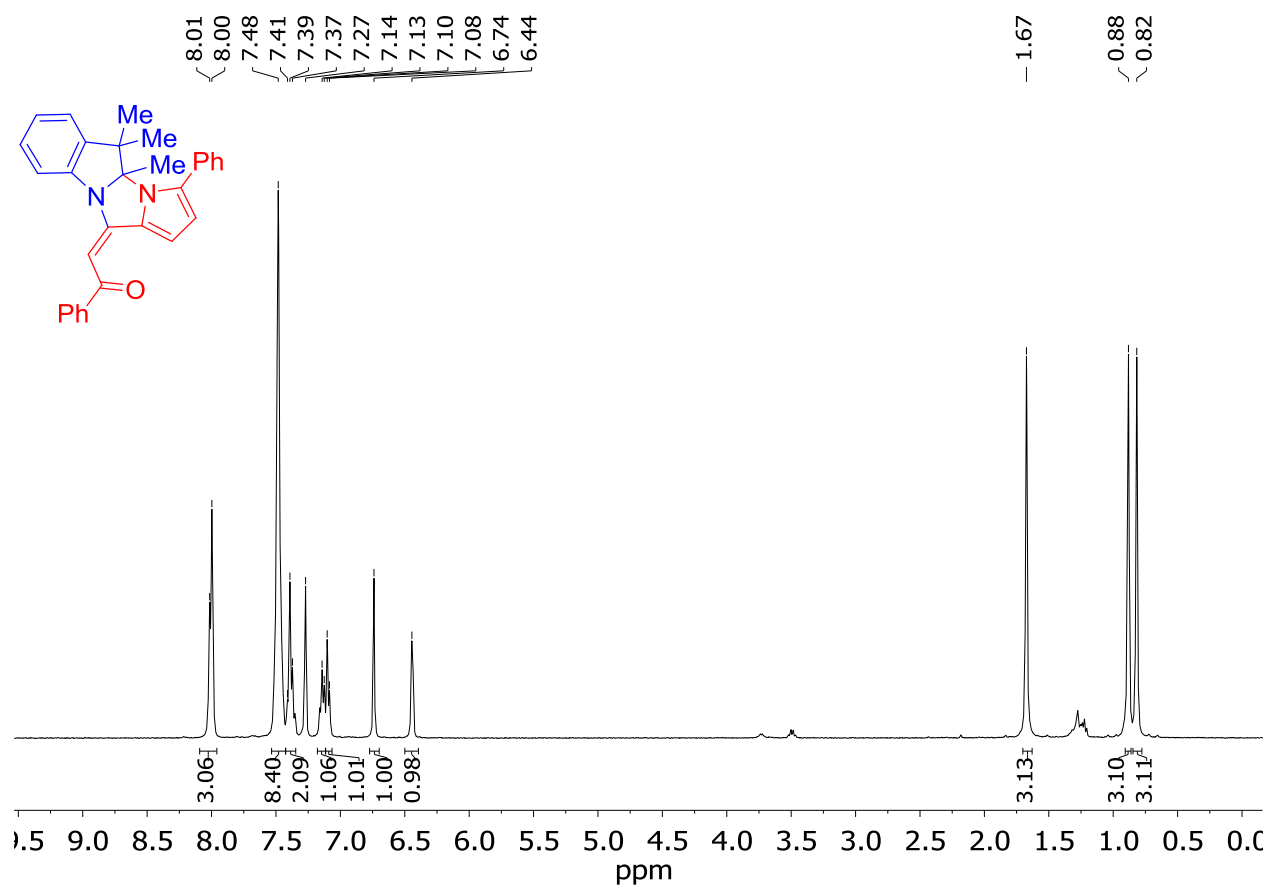

**<sup>1</sup>H NMR Spectrum of **3n** (400.13 MHz, CDCl<sub>3</sub>)**

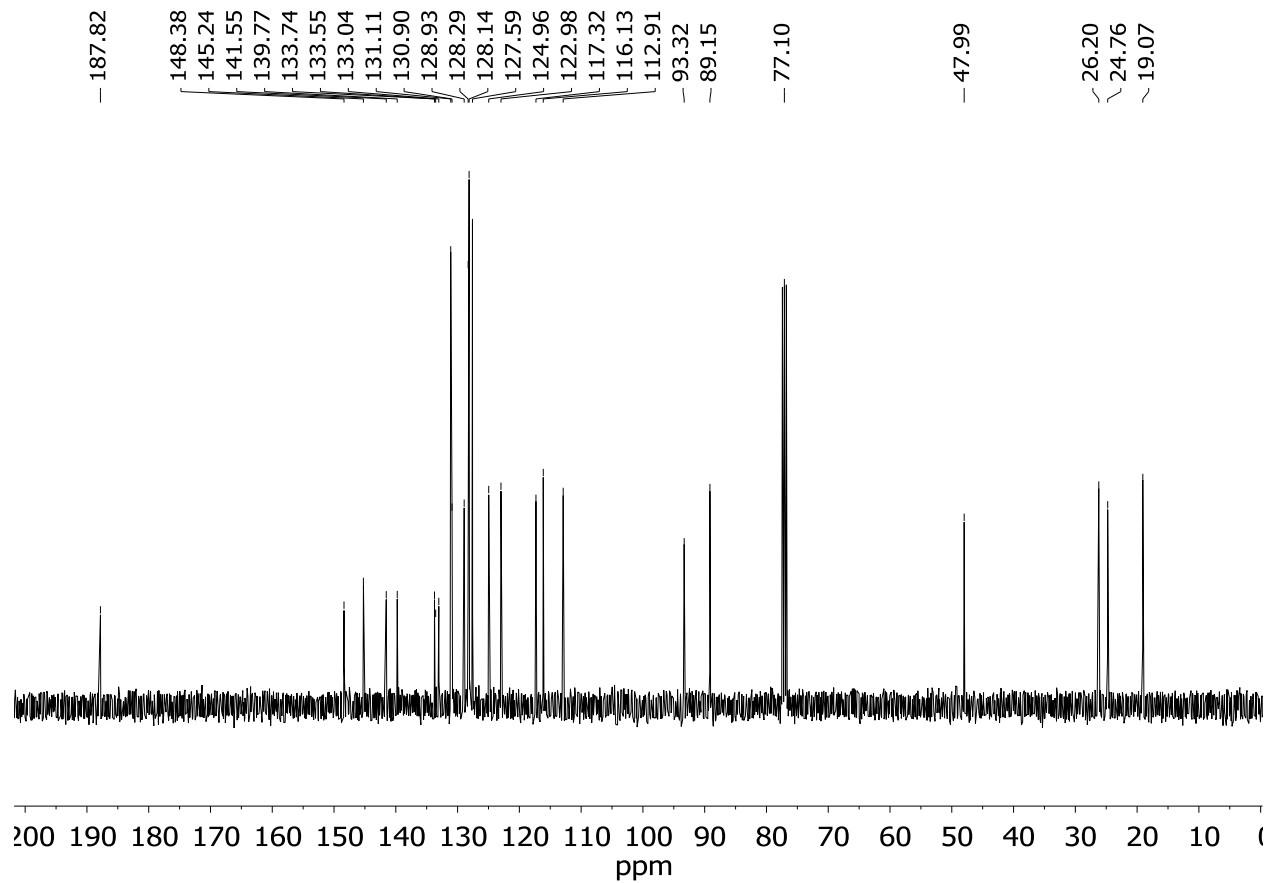

**<sup>13</sup>C NMR Spectrum of **3n** (100.62 MHz, CDCl<sub>3</sub>)**

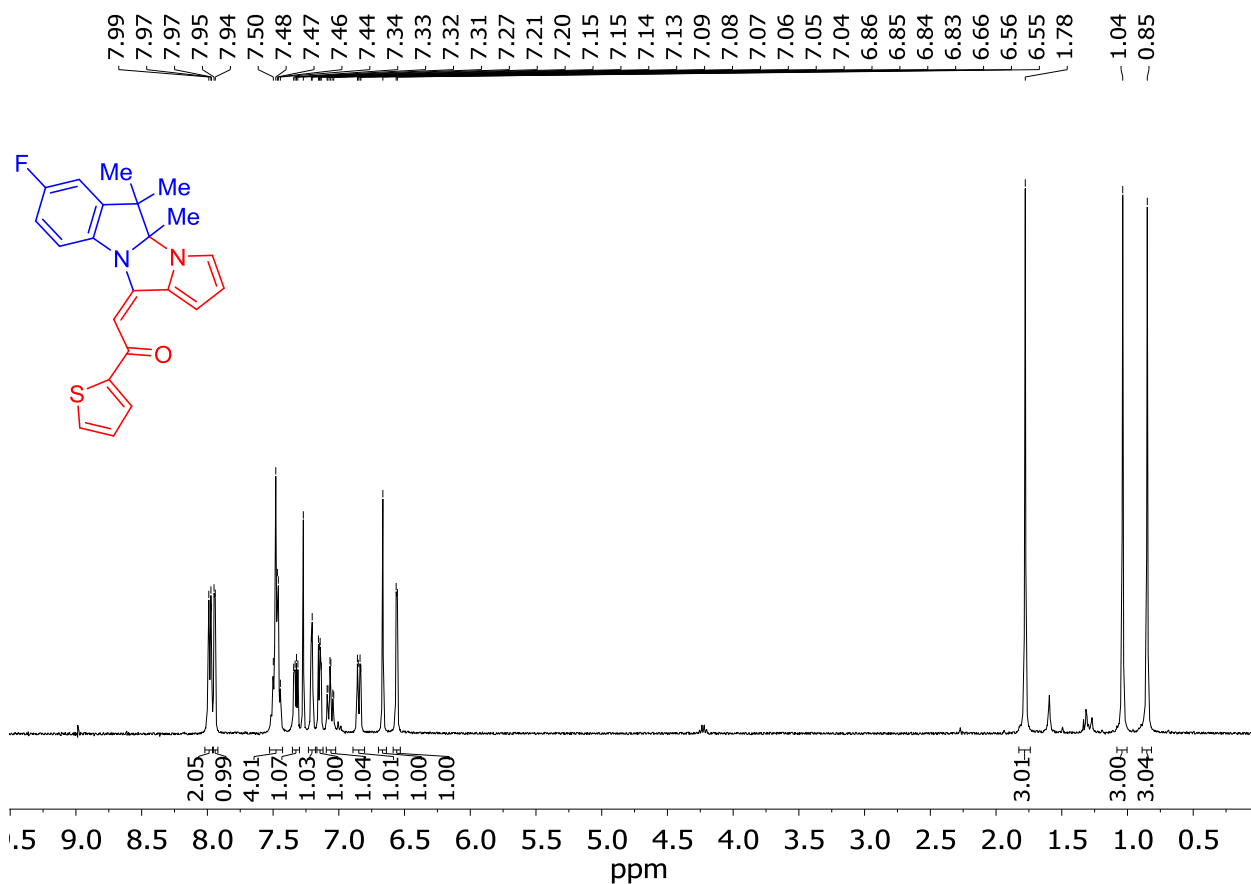

<sup>1</sup>H NMR Spectrum of **3o** (400.13 MHz, CDCl<sub>3</sub>)

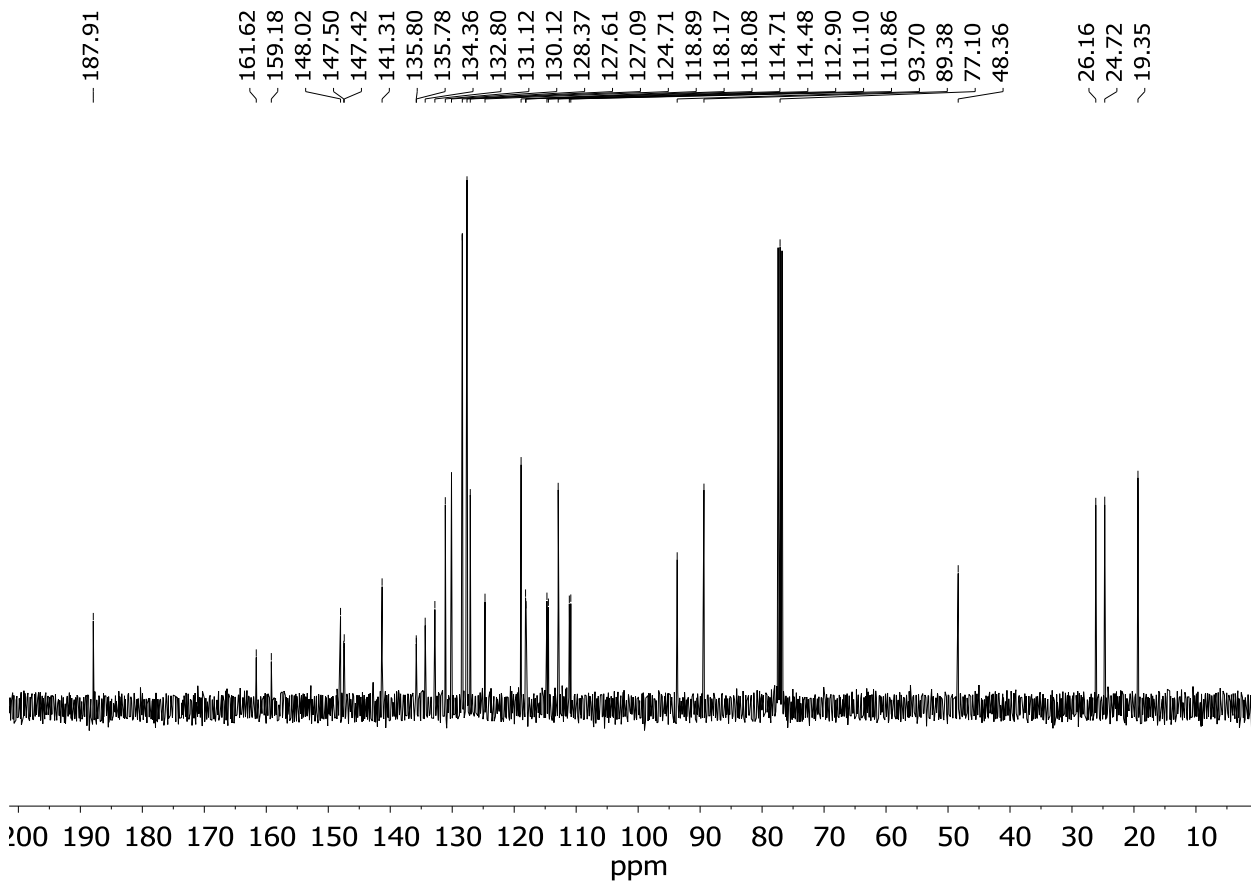

<sup>13</sup>C NMR Spectrum of **3o** (100.62 MHz, CDCl<sub>3</sub>)

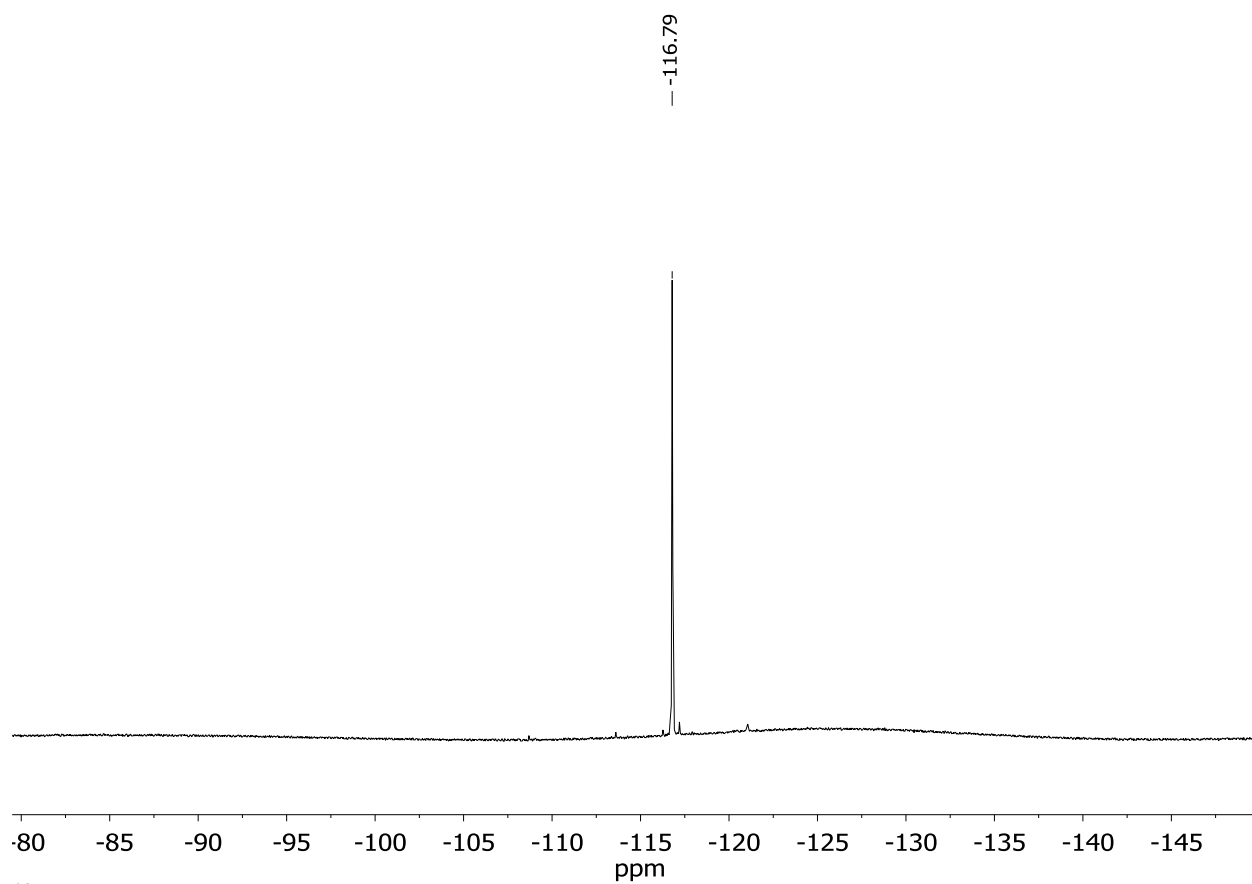

$^{19}\text{F}$  NMR Spectrum of **3o** (376.50 MHz,  $\text{CDCl}_3$ )

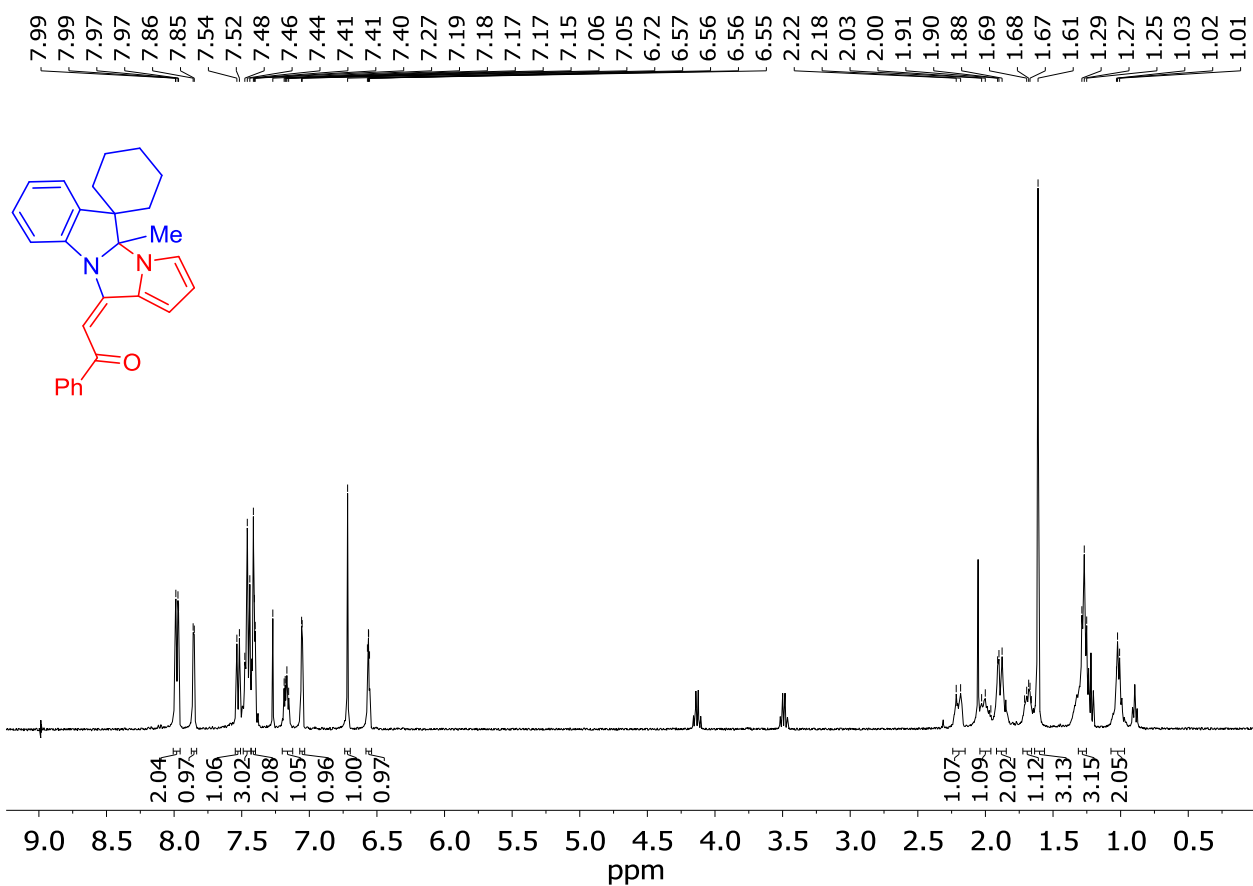

<sup>1</sup>H NMR Spectrum of **3p** (100.62 MHz, CDCl<sub>3</sub>)

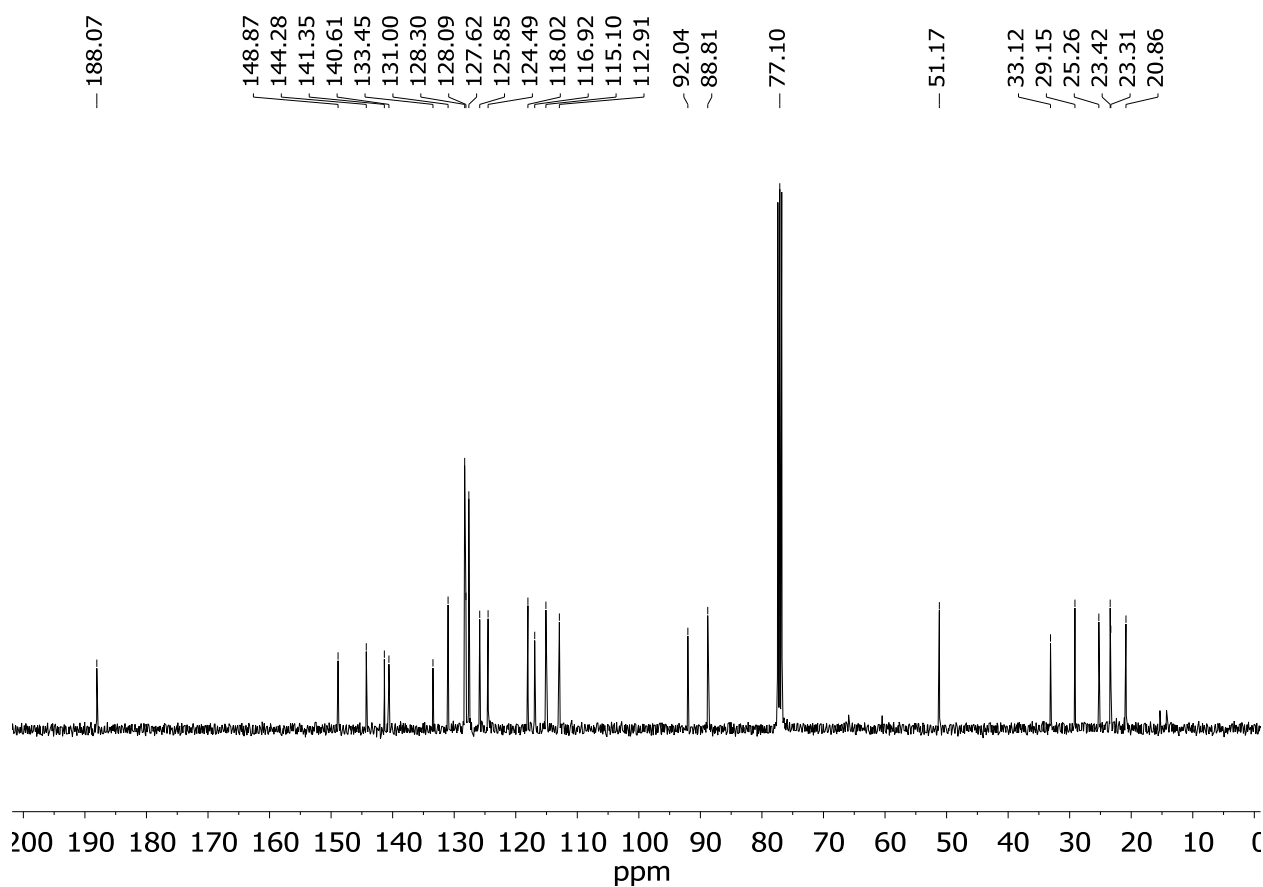

<sup>13</sup>C NMR Spectrum of **3p** (100.62 MHz, CDCl<sub>3</sub>)

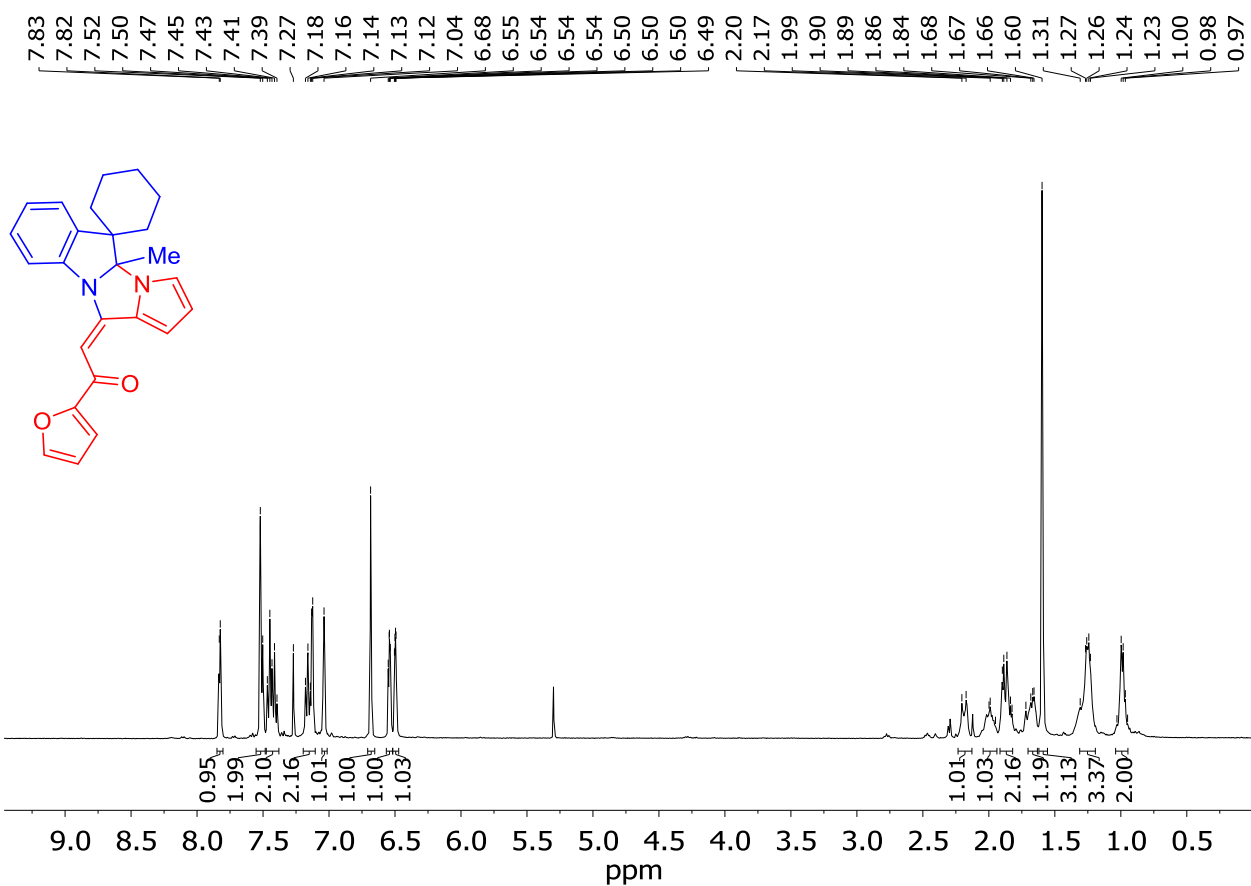

**<sup>1</sup>H NMR Spectrum of 3q (100.62 MHz, CDCl<sub>3</sub>)**

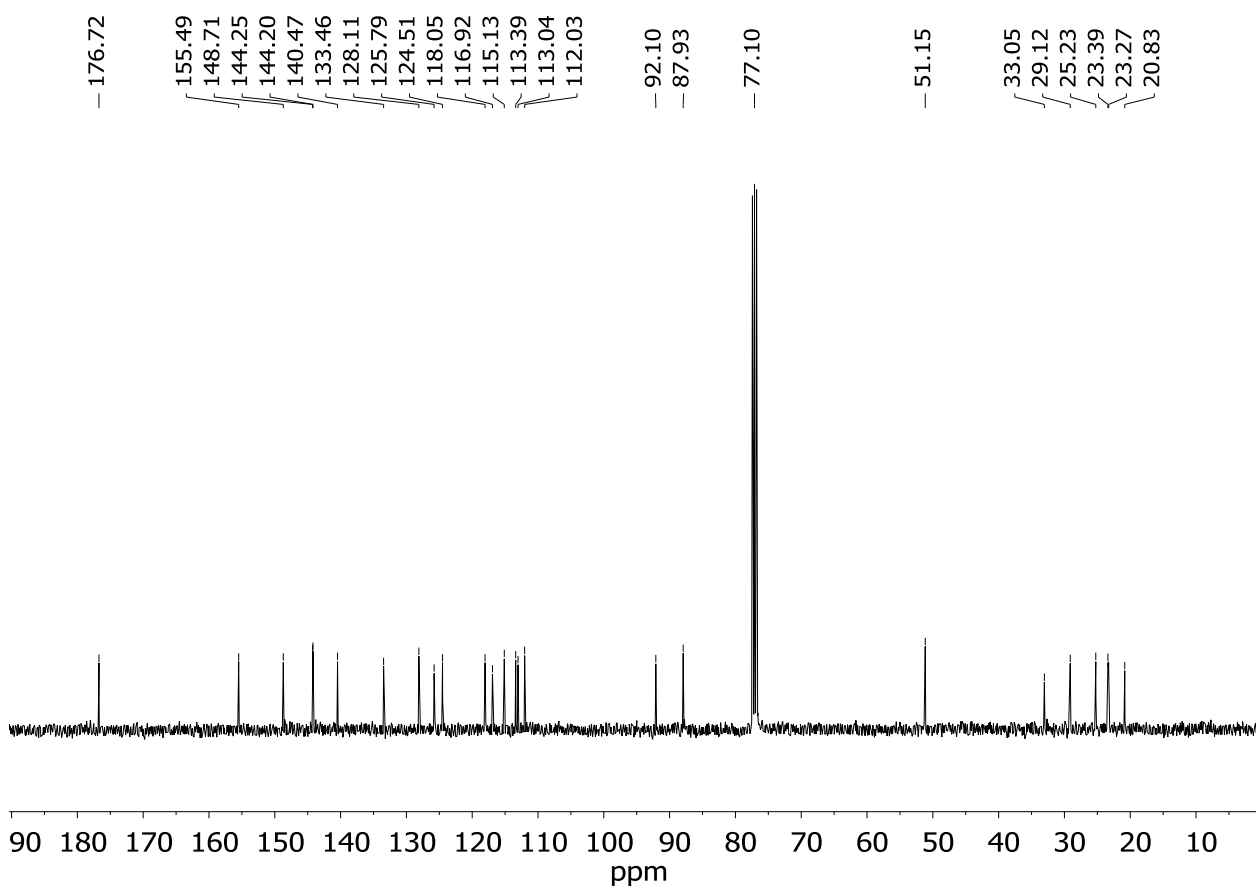

**<sup>13</sup>C NMR Spectrum of 3q (100.62 MHz, CDCl<sub>3</sub>)**



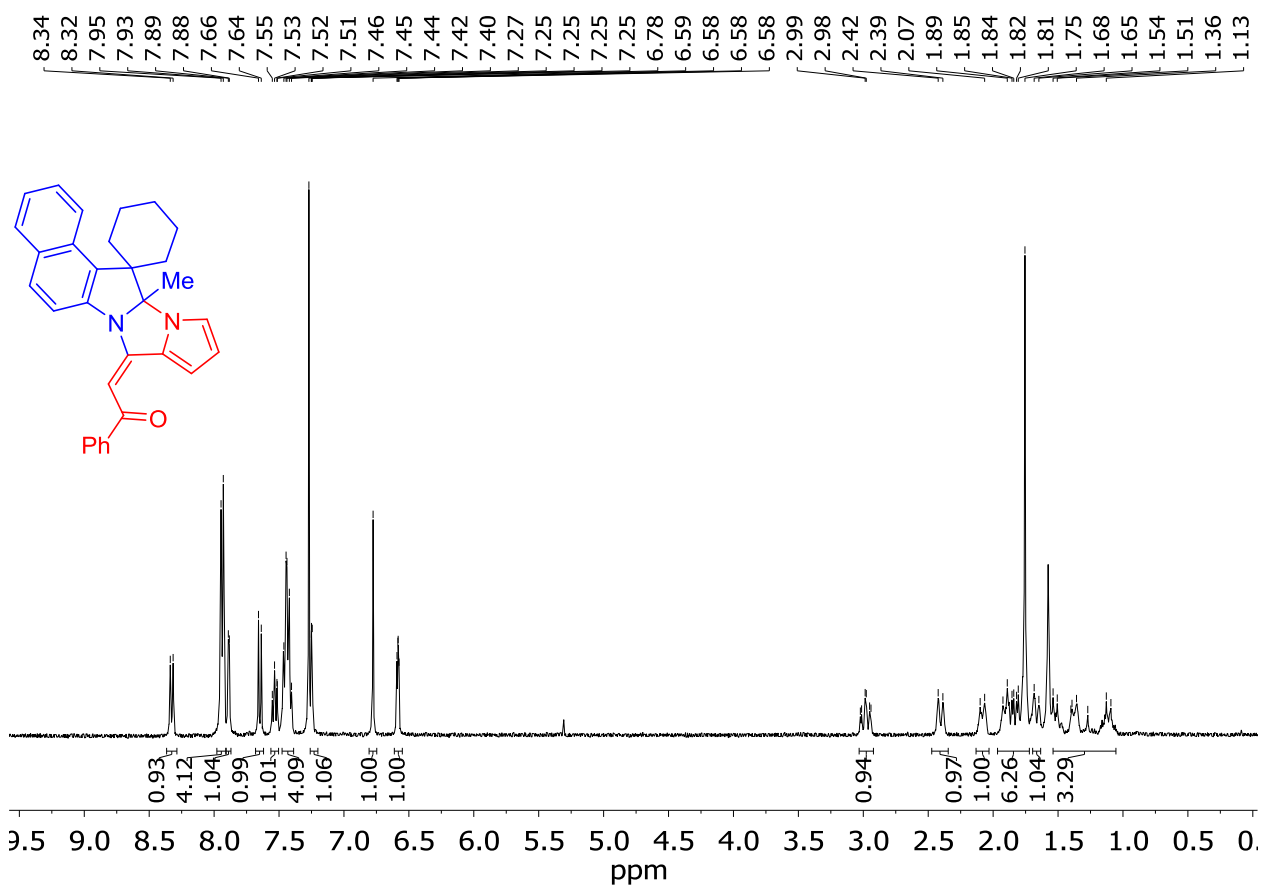

<sup>1</sup>H NMR Spectrum of 3r (400.13 MHz, CDCl<sub>3</sub>)

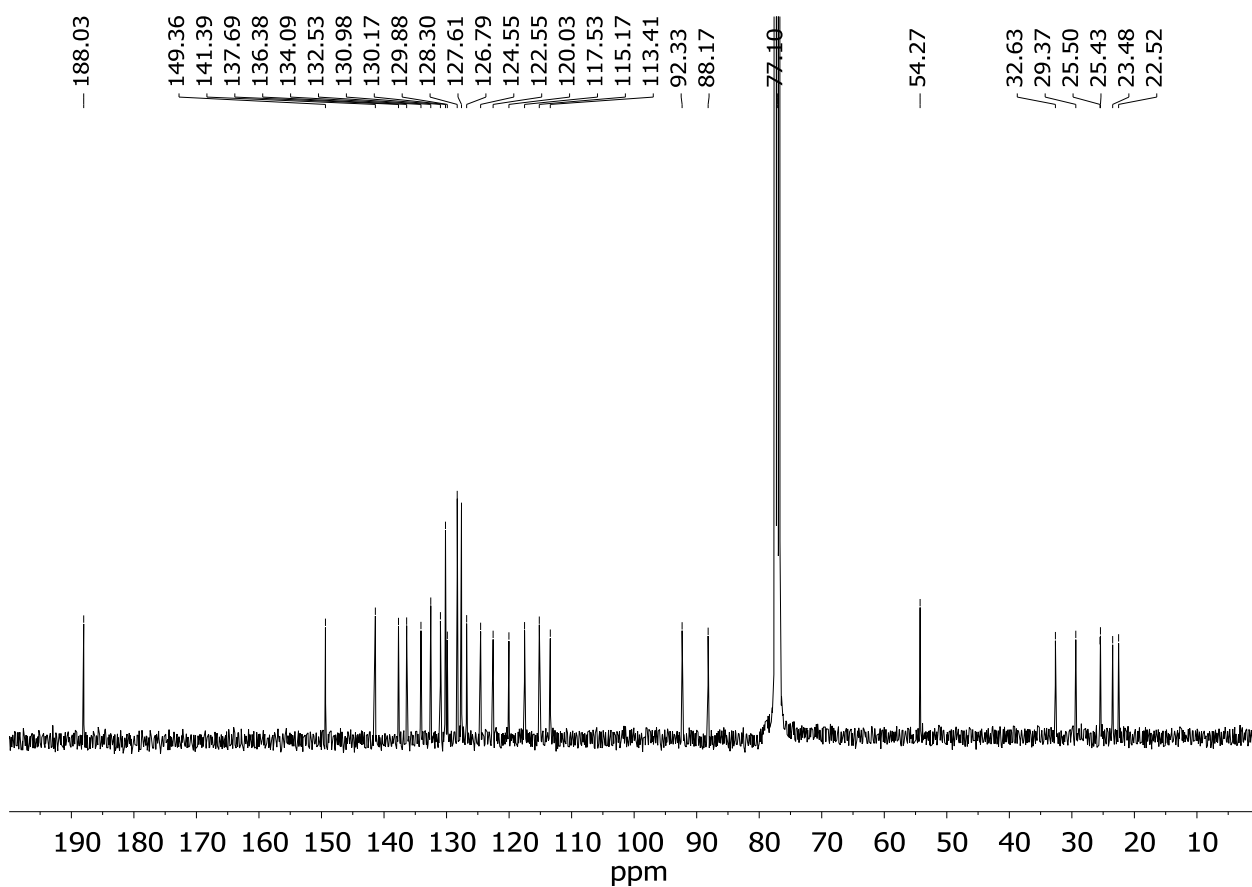

<sup>13</sup>C NMR Spectrum of 3r (100.62 MHz, CDCl<sub>3</sub>)

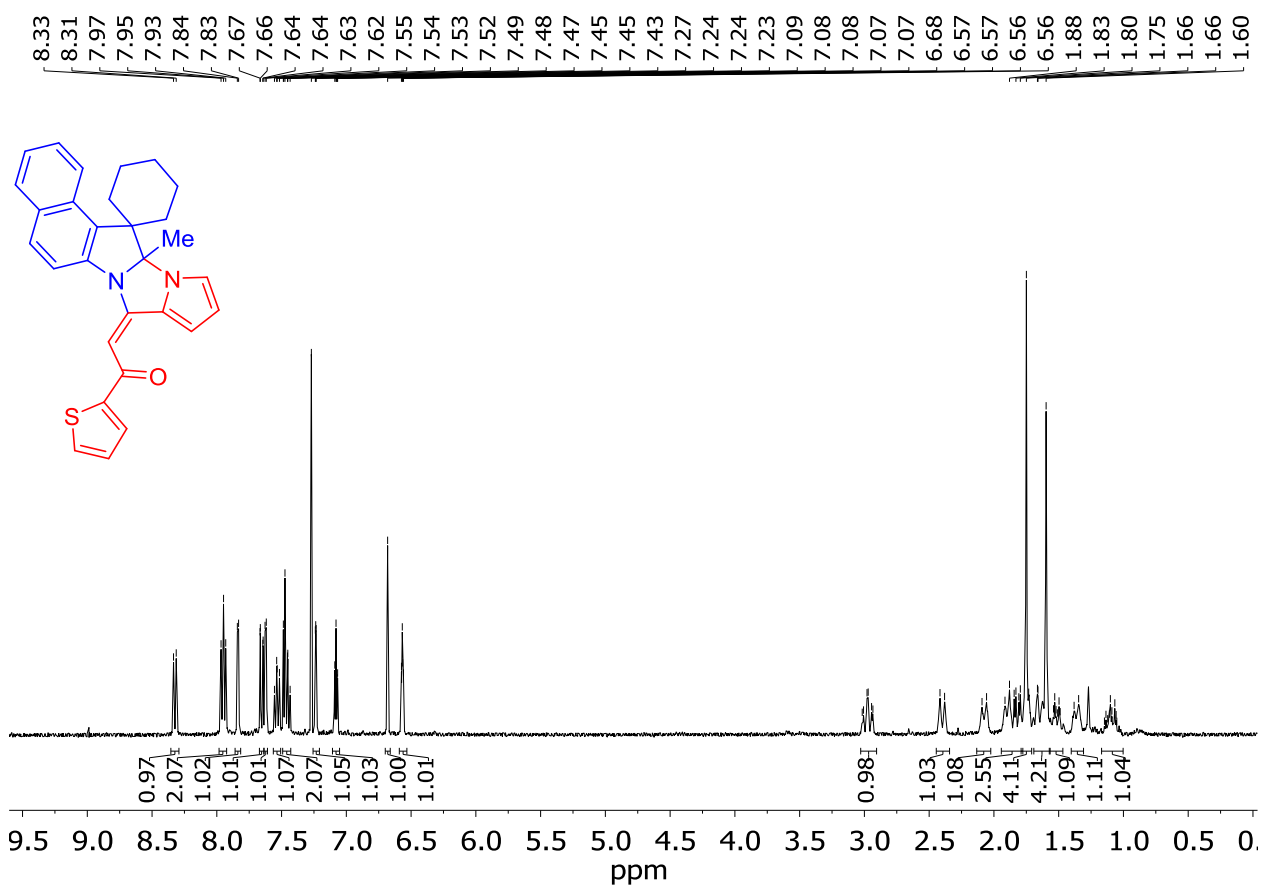

<sup>1</sup>H NMR Spectrum of **3s** (400.13 MHz, CDCl<sub>3</sub>)

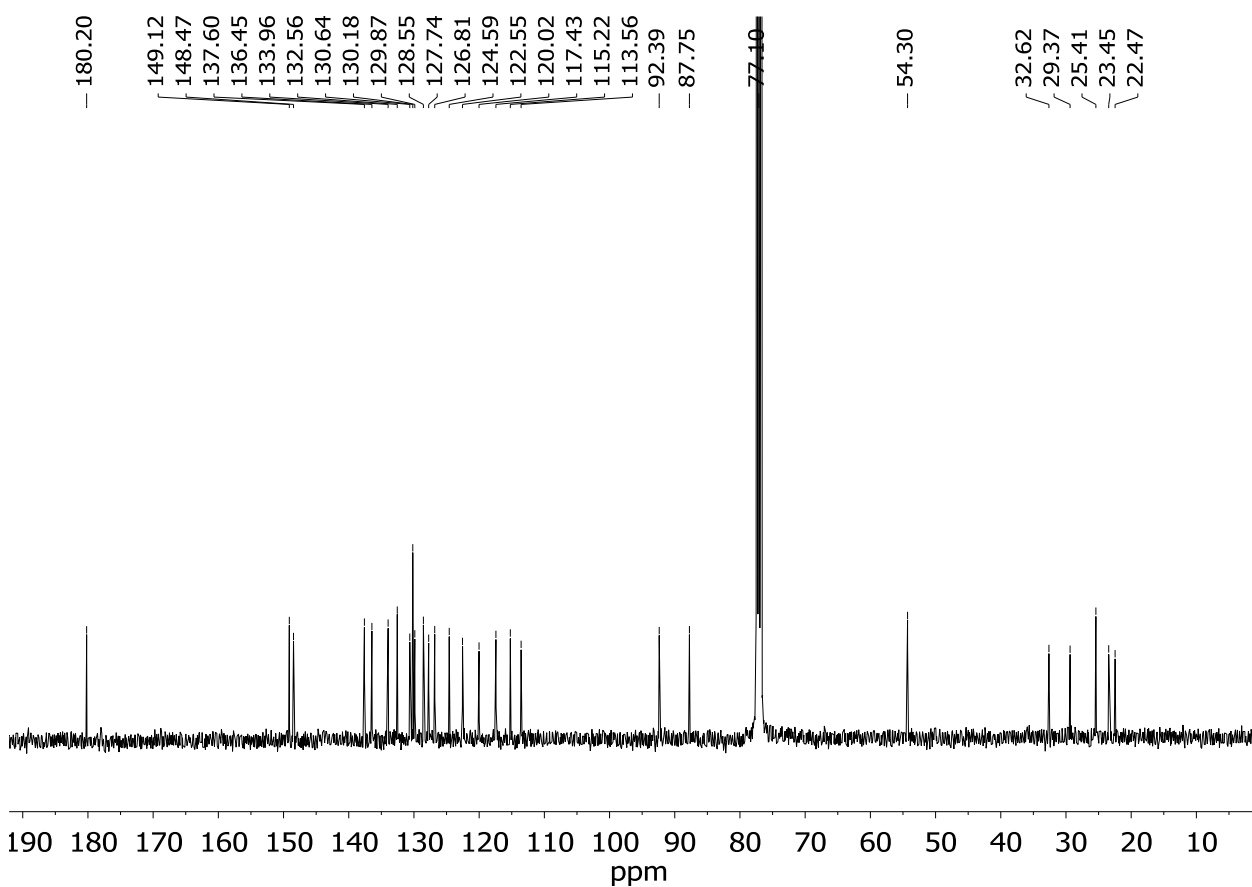

<sup>13</sup>C NMR Spectrum of **3s** (100.62 MHz, CDCl<sub>3</sub>)

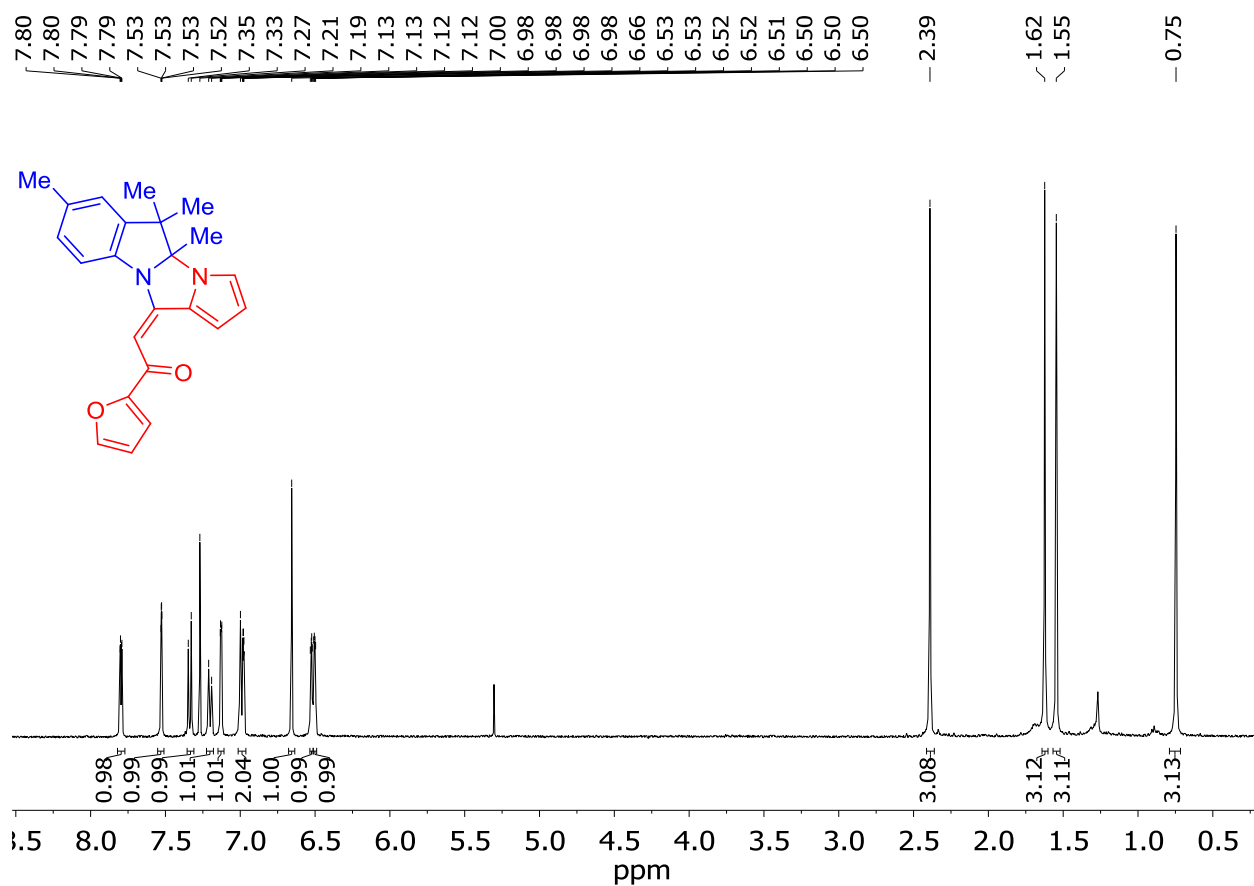

<sup>1</sup>H NMR Spectrum of 3t (400.13 MHz, CDCl<sub>3</sub>)

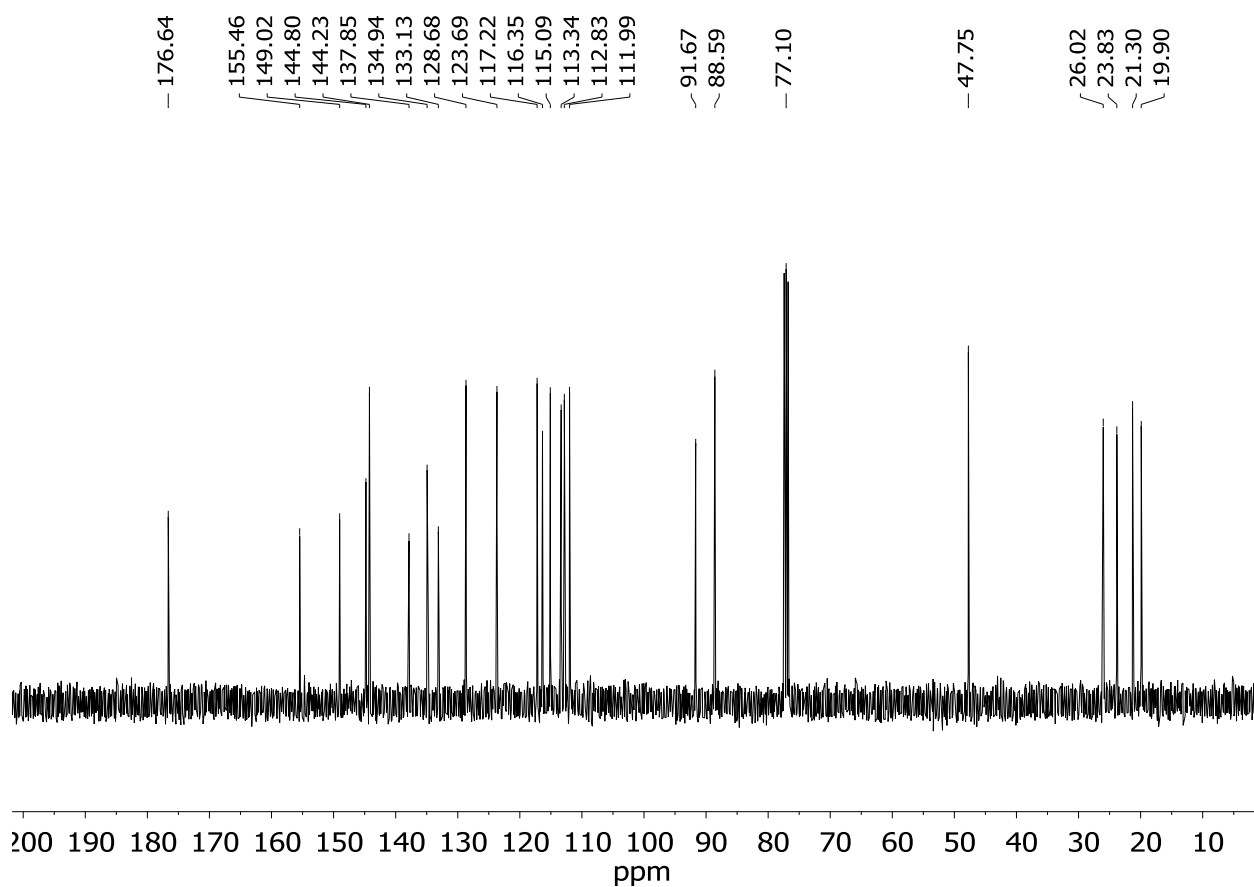

<sup>13</sup>C NMR Spectrum of 3t (100.62 MHz, CDCl<sub>3</sub>)

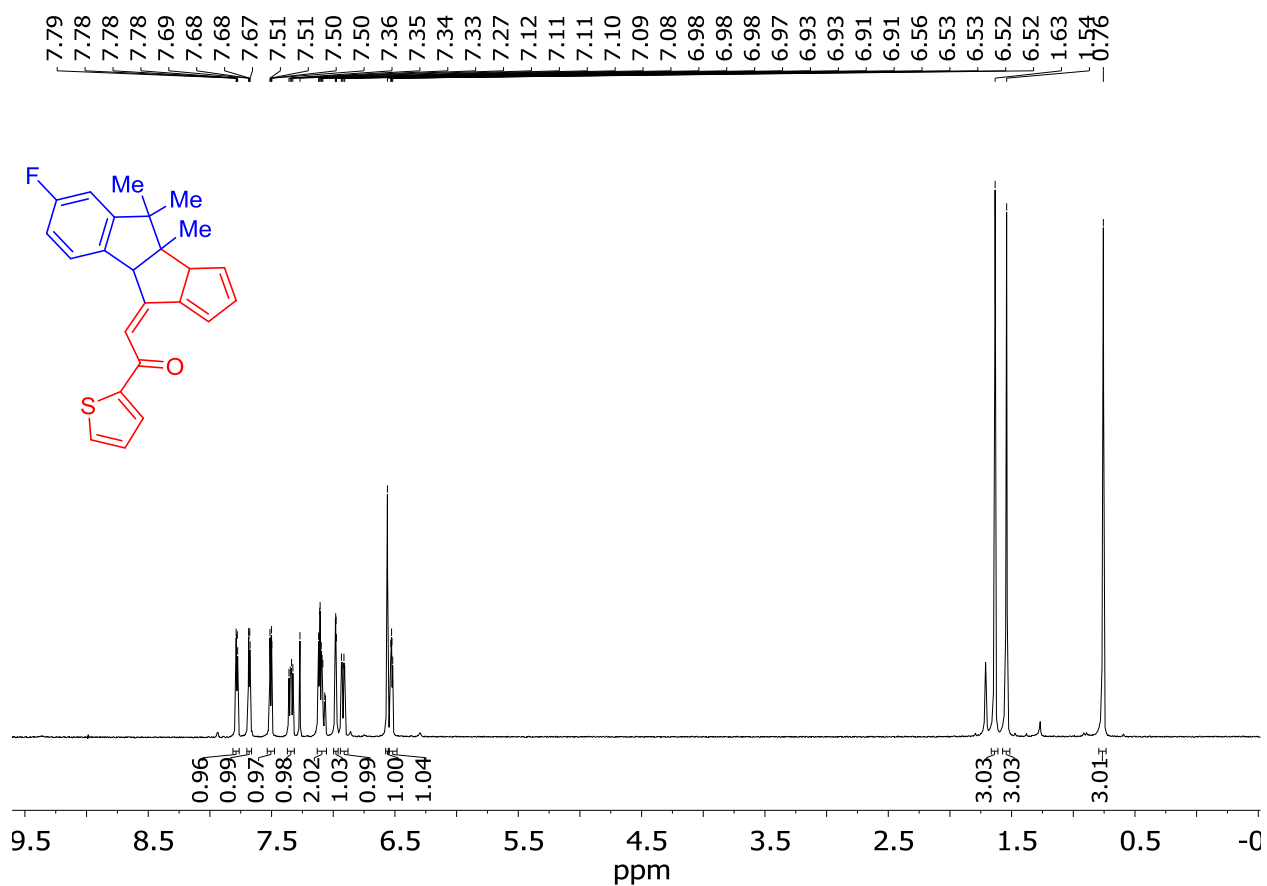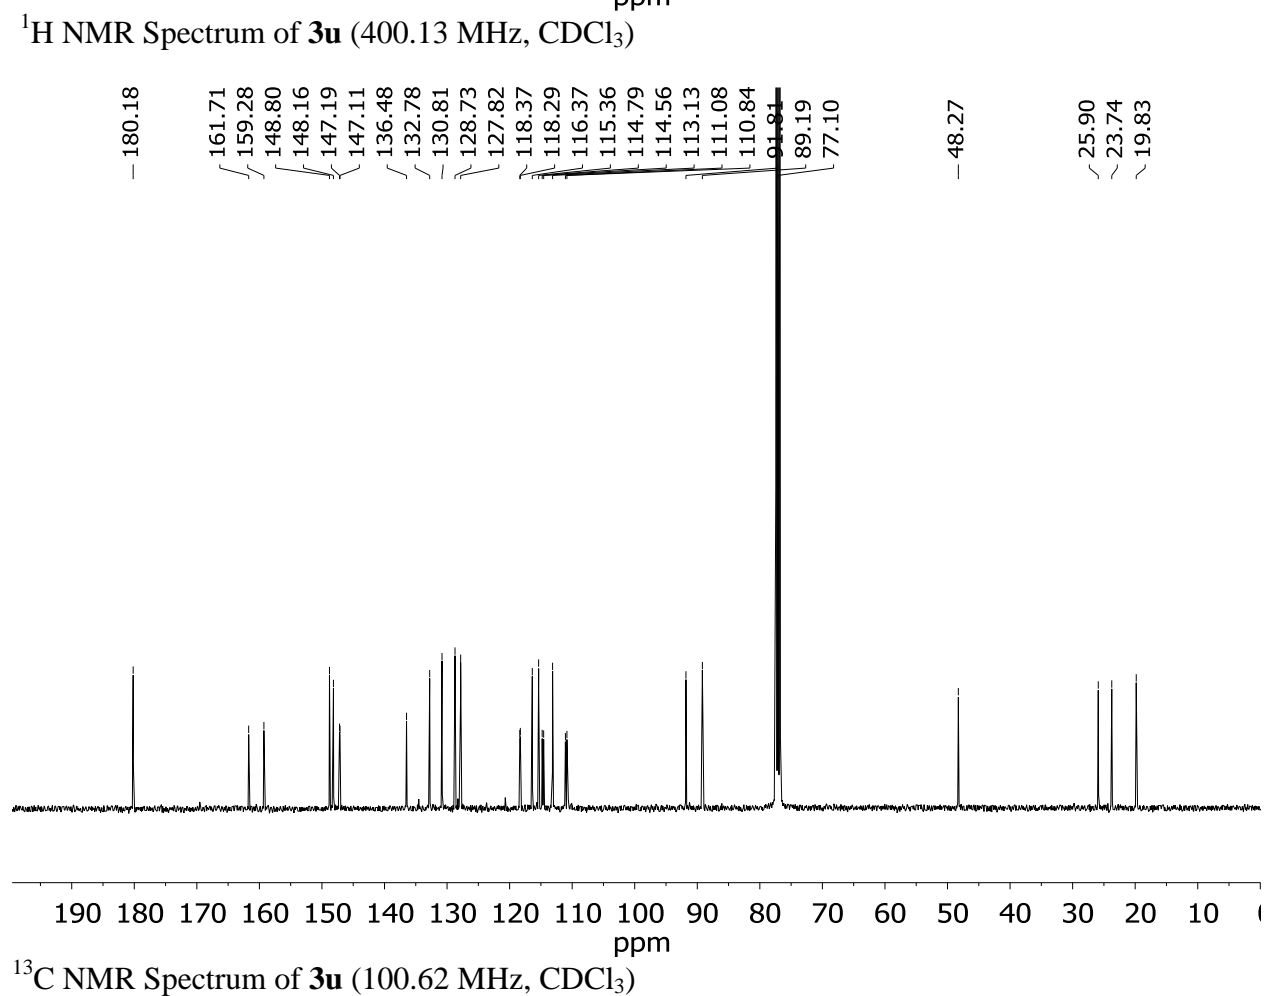

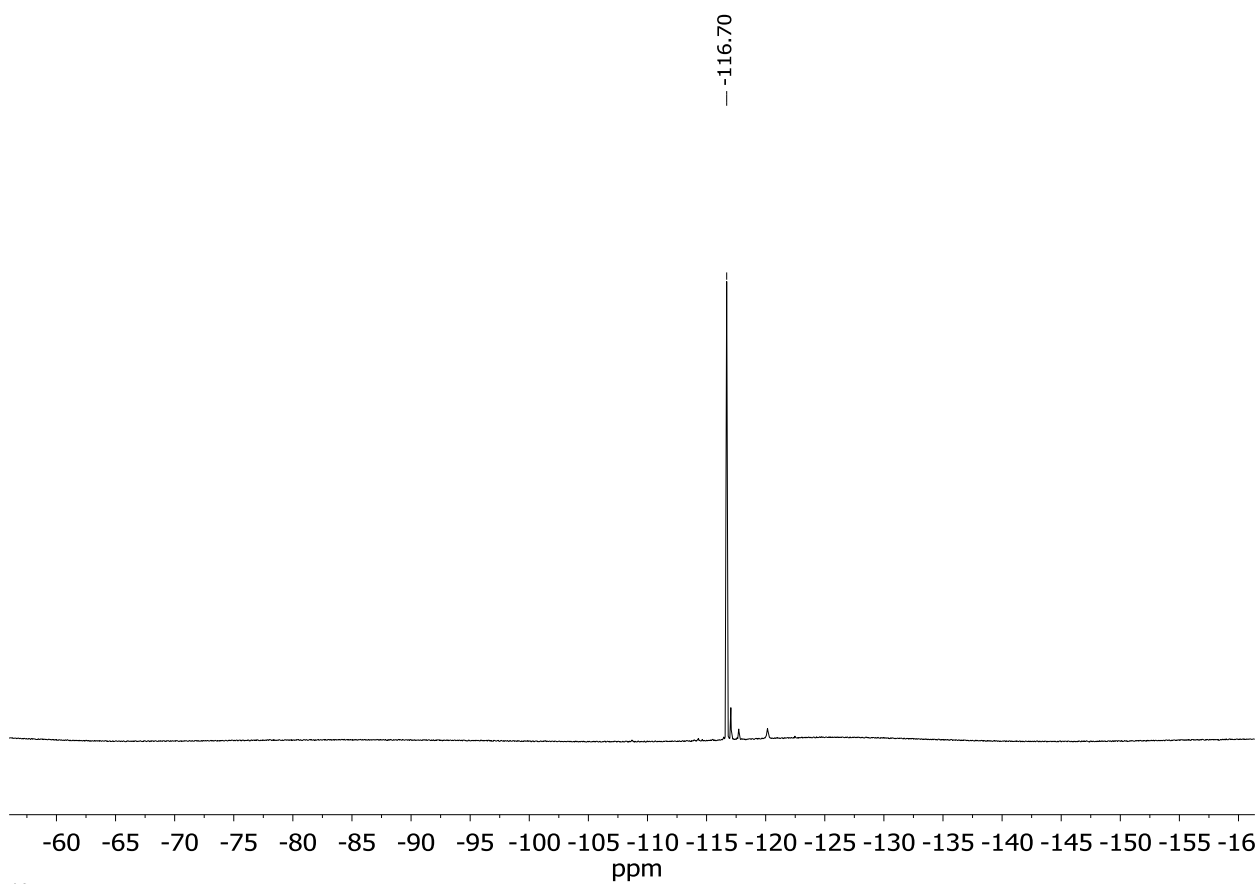

$^{19}\text{F}$  NMR Spectrum of **3u** (376.50 MHz,  $\text{CDCl}_3$ )

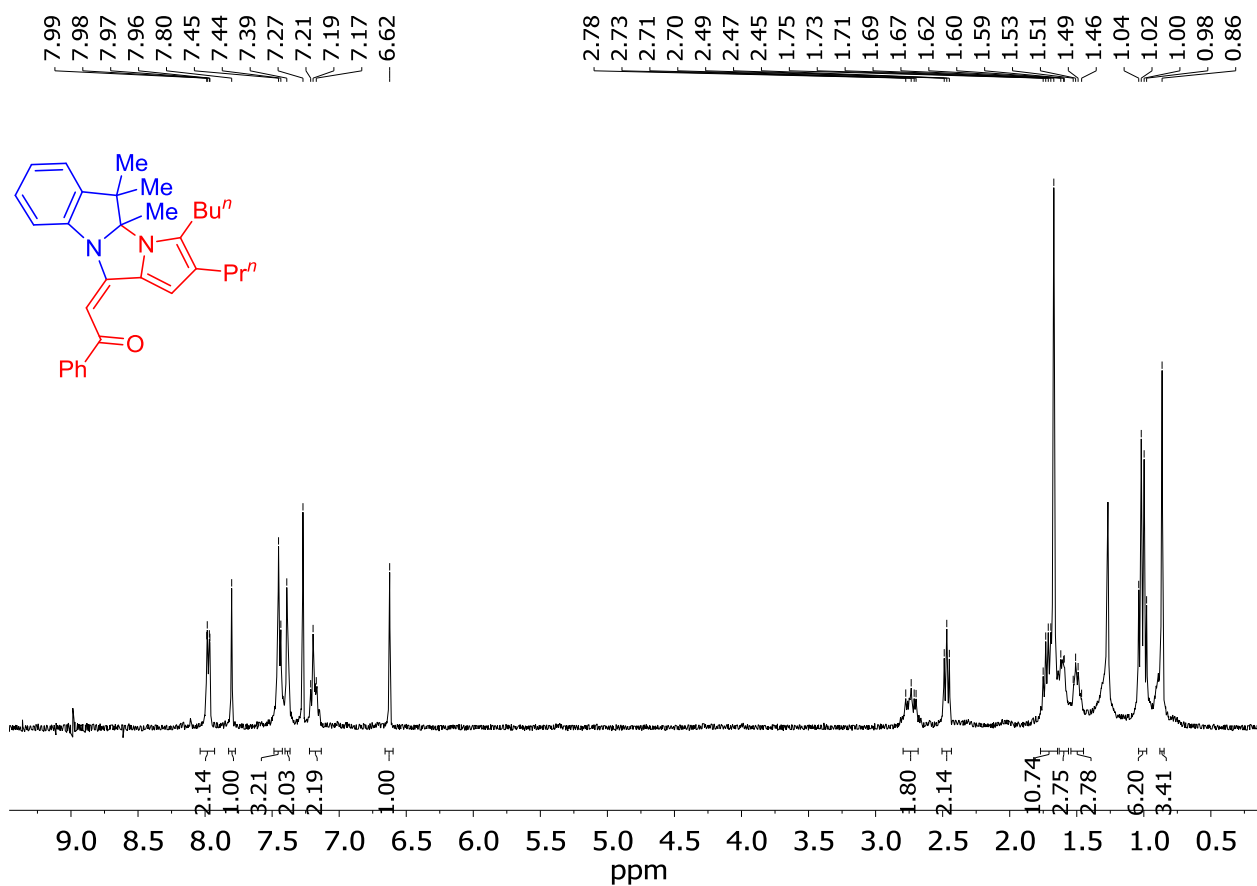

<sup>1</sup>H NMR Spectrum of **3v** (400.13 MHz, CDCl<sub>3</sub>)

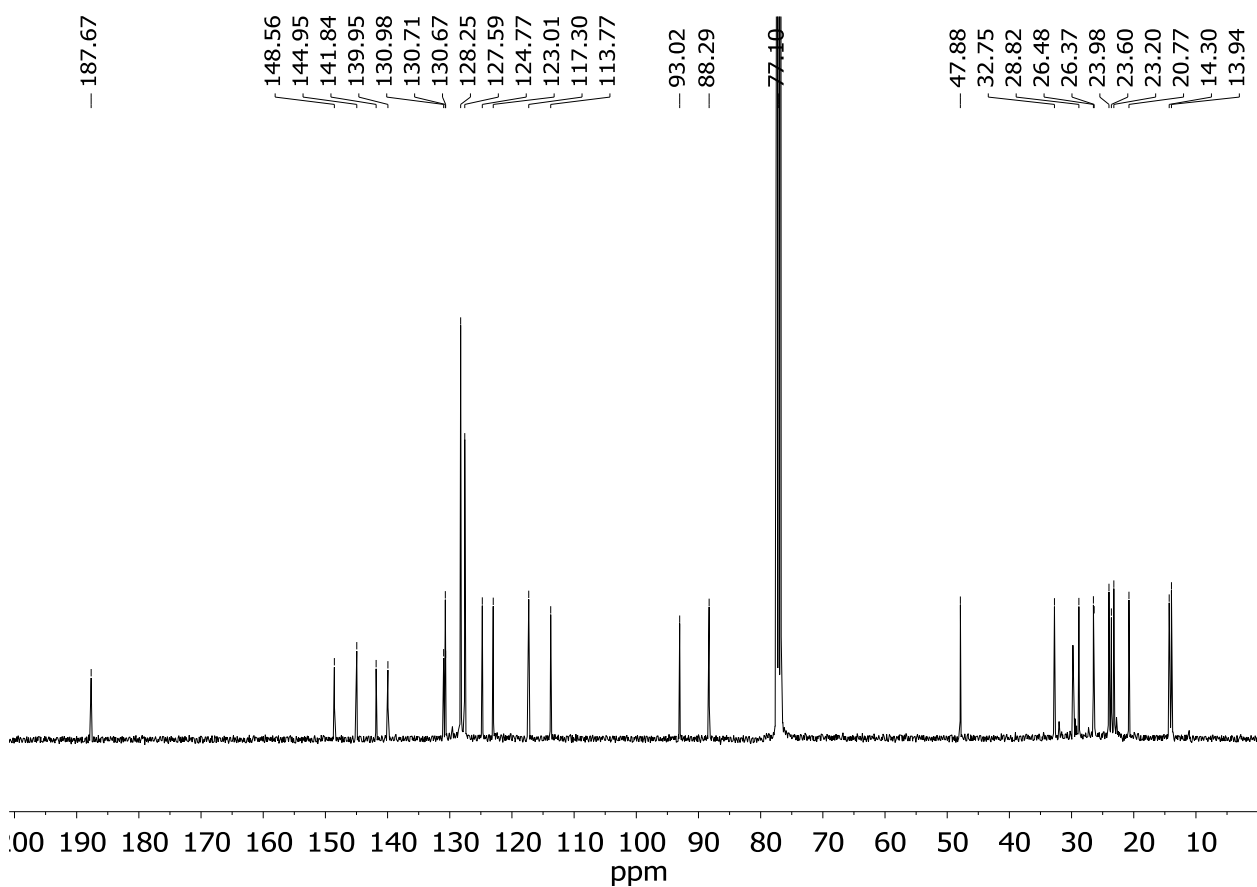

<sup>13</sup>C NMR Spectrum of **3v** (100.62 MHz, CDCl<sub>3</sub>)

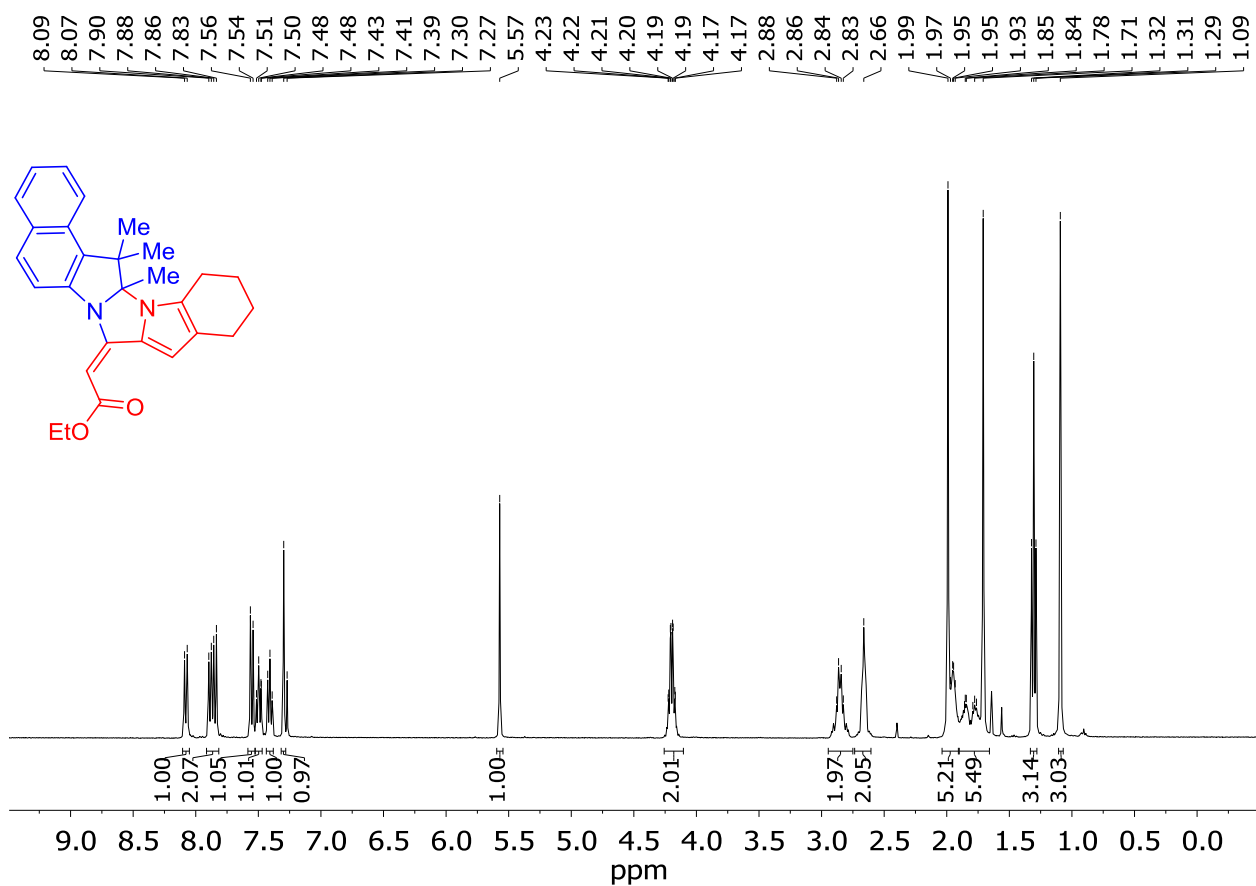

<sup>1</sup>H NMR Spectrum of **3w** (100.62 MHz, CDCl<sub>3</sub>)

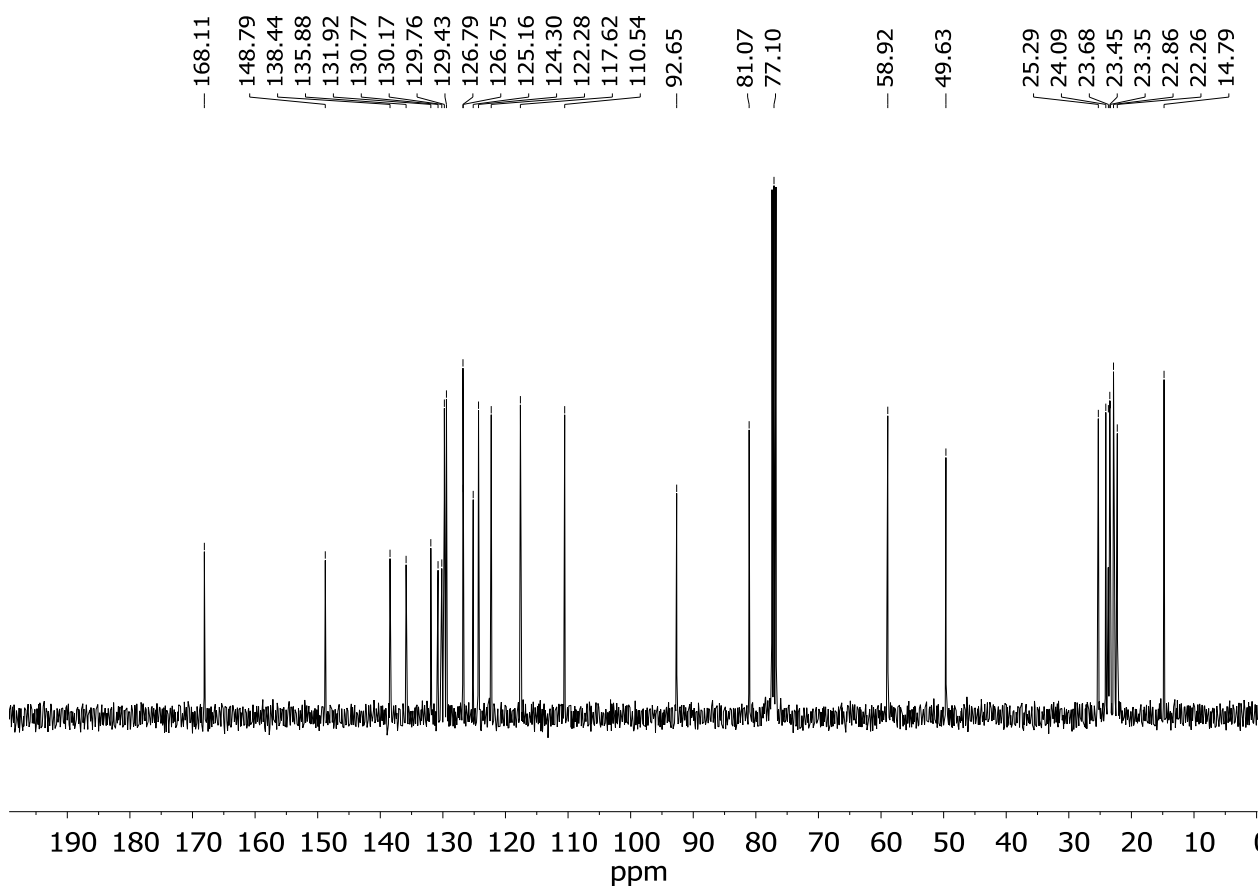

<sup>13</sup>C NMR Spectrum of **3w** (100.62 MHz, CDCl<sub>3</sub>)

## 6. Computational details

All calculations were performed using the Gaussian09 suite of programs.<sup>7</sup> Based on general recommendations,<sup>8</sup> geometry optimization was performed using Head-Gordon's long-range corrected DFT-D2 hybrid functional ( $\omega$ B97XD)<sup>9</sup> and balanced split valence triple- $\xi$  with two sets of polarization functions Def2-TZVPP basis set. To achieve an accurate total energy, Grimme's B2PLYP-D3BJ double hybrid density functional and the same basis set with an additional diffuse function set on all atoms, Def2-TZVPPD, single point energy refinement step was performed utilizing optimized geometry.<sup>10</sup> Tight SCF convergence threshold and ultrafine DFT integration grid were applied at all calculation steps. Solvation effect on the mechanism was performed for water, using Truhlar's universal solvation model density (SMD) throughout the manuscript.<sup>11</sup> For each stationary point, second derivatives of the energy with respect to the Cartesian nuclear coordinates were calculated to confirm whether these structures were local minima or transition states. All transition state calculations were accompanied by intrinsic reaction coordinate (IRC) calculations at  $\omega$ B97XD/DGDZVP level of theory to verify that each transition state connected the corresponding reactant and product.<sup>12</sup> For structure visualization, ChemCraft 1.8 was employed.<sup>13</sup> Charge model 5 (CM5) charges proposed by Truhlar et al.<sup>14</sup> were performed using Multiwfn 3.8 and the B2PLYP-D3BJ/Def2-TZVPPD "relaxed correlated" wavefunction.<sup>15</sup> Both DFT functionals predict comparable relative total energies of intermediates, the RMSE and MAD are ca. 1.5 and 1.3 kcal/mol, respectively.

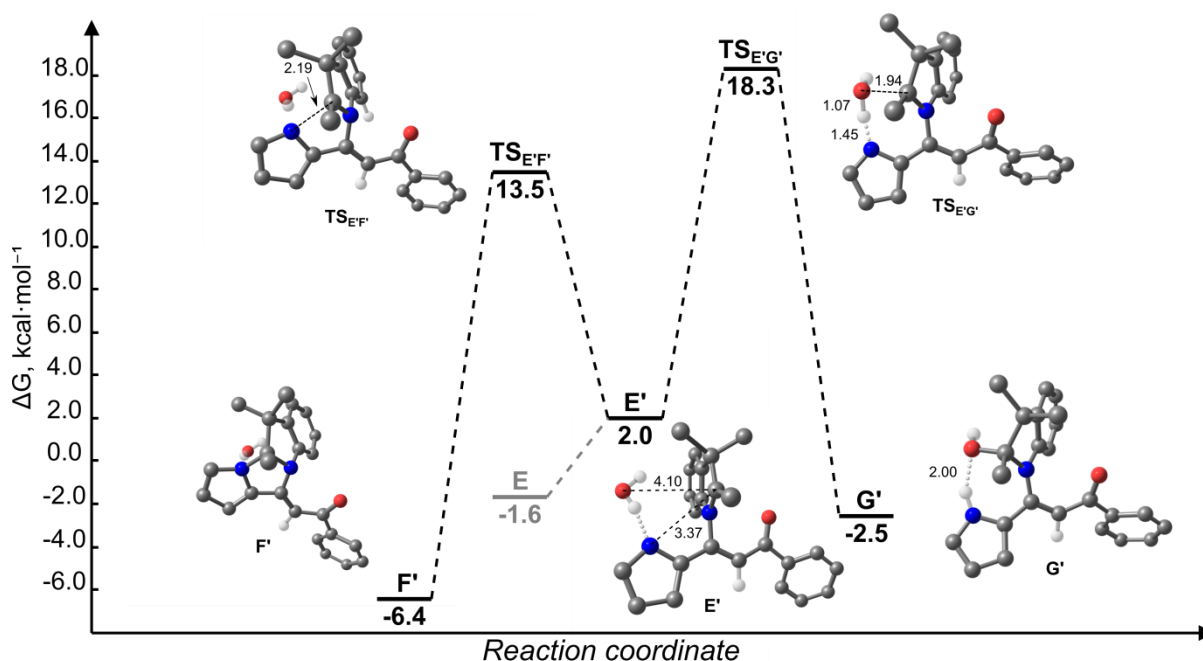

**Fig. S1.** Free energy profile for competitive intermediate **F'** and intermediate **G'** formation.

### Cartesian coordinates, the number of imaginary frequencies, and computed total energies of target and optimized structures

**H<sub>2</sub>O**;  $E_{\text{B2PLYP-D3BJ}} = -76.42788065349$ ;  $E_{\omega\text{B97XD}} = -76.45353003570$ ; ZPE = 0.021470;  $Q_{\text{corr}} = 0.024306$ ;  $H_{\text{corr}} = 0.025250$ ;  $G_{\text{corr}} = 0.003835$ ;  
 O -0.16698501 0.00000000 -0.74674174  
 H -0.16698501 0.75734120 -0.15889386  
 H -0.16698501 -0.75734120 -0.15889386



**1a** (isomer 1); E\_B2PLYP-D3BJ = -630.4646802491; E\_wB97XD = -630.73367765; ZPE = 0.185198 Qcorr = 0.197436; Hcorr = 0.198381; Gcorr = 0.143683;

|   |             |             |             |
|---|-------------|-------------|-------------|
| C | -0.05084386 | 0.04069298  | -0.48247833 |
| C | -1.29953088 | -0.06148905 | 0.12963796  |
| C | 1.09924149  | 0.10657712  | 0.30099306  |
| C | -1.39397905 | -0.09719064 | 1.50876598  |
| C | 1.00132107  | 0.07036815  | 1.68214842  |
| C | -0.24374478 | -0.03139058 | 2.28598359  |
| H | -2.19035245 | -0.11195915 | -0.48111227 |
| H | 2.07109875  | 0.18613717  | -0.16795960 |
| H | -2.36375273 | -0.17665584 | 1.98111579  |
| H | 1.89640157  | 0.12115389  | 2.28706288  |
| H | -0.31965000 | -0.05955369 | 3.36500721  |
| C | 0.02120128  | 0.07619268  | -1.96505982 |
| O | -0.97804473 | 0.01525694  | -2.67106896 |
| C | 1.31824182  | 0.18566792  | -2.56668256 |
| C | 2.39645954  | 0.27608255  | -3.10408986 |
| C | 3.64514370  | 0.38104422  | -3.72759125 |
| C | 3.96578027  | 0.43008159  | -5.07475426 |
| H | 3.25411132  | 0.39151225  | -5.88282024 |
| C | 5.36335181  | 0.53650160  | -5.16685931 |
| H | 5.95079354  | 0.59664931  | -6.06764630 |
| C | 5.85808031  | 0.54941056  | -3.87879816 |
| H | 6.87049354  | 0.61830766  | -3.51876297 |
| N | 4.82192530  | 0.45590204  | -3.02054964 |
| H | 4.89183118  | 0.44136518  | -2.01679638 |

**1a** (isomer 2); E\_B2PLYP-D3BJ = -630.46476419972; E\_wB97XD = -630.733752219; ZPE = 0.185344; Qcorr = 0.197534; Hcorr = 0.198478; Gcorr = 0.144237;

|   |             |             |             |
|---|-------------|-------------|-------------|
| C | -0.06524803 | 0.02663542  | -0.52591235 |
| C | -1.31072531 | -0.01140701 | 0.10005191  |
| C | 1.09485384  | 0.05454331  | 0.24506448  |
| C | -1.39204051 | -0.02124510 | 1.48044451  |
| C | 1.00999487  | 0.04431515  | 1.62753561  |
| C | -0.23187685 | 0.00655634  | 2.24514707  |
| H | -2.20948565 | -0.03272049 | -0.50068045 |
| H | 2.06424163  | 0.08408041  | -0.23467557 |
| H | -2.35932252 | -0.05066483 | 1.96354327  |
| H | 1.91275337  | 0.06569127  | 2.22270411  |
| H | -0.29760921 | -0.00125493 | 3.32518164  |
| C | -0.00679920 | 0.03628620  | -2.00952929 |
| O | -1.01467045 | 0.00858779  | -2.70531387 |
| C | 1.28805382  | 0.07994741  | -2.62423938 |
| C | 2.36627908  | 0.11556088  | -3.16804482 |
| C | 3.62504652  | 0.15705813  | -3.77874117 |
| C | 4.88685581  | 0.19091855  | -3.20678639 |
| H | 5.08692366  | 0.19011093  | -2.14803538 |
| C | 5.81934205  | 0.22555621  | -4.25654830 |
| H | 6.89248318  | 0.25687367  | -4.16960004 |
| C | 5.10563356  | 0.21201272  | -5.43762268 |
| H | 5.44386010  | 0.22872012  | -6.45969414 |
| N | 3.79013524  | 0.17083499  | -5.14333895 |

H 3.03927489 0.15211232 -5.81312887

**1a'** (isomer 1); E\_B2PLYP-D3BJ = -706.89862707126; E\_wB97XD = -707.19362383; ZPE = 0.20922; Qcorr = 0.224971; Hcorr = 0.225915; Gcorr = 0.163656;

|   |             |             |             |
|---|-------------|-------------|-------------|
| C | -3.63651604 | -0.16443788 | 1.68359257  |
| C | -4.89003753 | -0.24436974 | 2.28891152  |
| C | -2.48765634 | -0.16929124 | 2.47134874  |
| C | -4.98999937 | -0.32793185 | 3.66574421  |
| C | -2.59088014 | -0.25291649 | 3.84997874  |
| C | -3.84073898 | -0.33205329 | 4.44731765  |
| H | -5.78012620 | -0.24071273 | 1.67494531  |
| H | -1.51182749 | -0.10756470 | 2.00841392  |
| H | -5.96352586 | -0.39022045 | 4.13296338  |
| H | -1.69578450 | -0.25622962 | 4.45714930  |
| H | -3.92135485 | -0.39733581 | 5.52441479  |
| C | -3.55645377 | -0.07483508 | 0.20321081  |
| O | -4.55525826 | -0.06484335 | -0.50668229 |
| C | -2.25301767 | 0.00193116  | -0.38720673 |
| C | -1.16430020 | 0.06669827  | -0.90796639 |
| C | 0.09891418  | 0.14274194  | -1.50585683 |
| C | 0.44515128  | 0.24260817  | -2.84537776 |
| H | -0.25187628 | 0.27698290  | -3.66645485 |
| C | 1.84662224  | 0.28906988  | -2.90723414 |
| H | 2.45459279  | 0.36605764  | -3.79318538 |
| C | 2.31340164  | 0.21600242  | -1.60867543 |
| H | 3.32157046  | 0.22010779  | -1.22966309 |
| N | 1.26085424  | 0.12880488  | -0.77259786 |
| H | 1.30732183  | 0.05671391  | 0.24546991  |
| O | 1.30995360  | -0.09771538 | 2.09006377  |
| H | 1.67708120  | 0.70122608  | 2.47404540  |
| H | 1.91950242  | -0.79434962 | 2.34249671  |

**1a'** (isomer 2); E\_B2PLYP-D3BJ = -706.89872387234; E\_wB97XD = -707.19390106; ZPE = 0.209174; Qcorr = 0.224984; Hcorr = 0.225928; Gcorr = 0.162930;

|   |             |             |             |
|---|-------------|-------------|-------------|
| C | -3.55069065 | -0.19472263 | 1.54058890  |
| C | -4.82598141 | -0.24072244 | 2.10250395  |
| C | -2.43224152 | -0.13079298 | 2.36878437  |
| C | -4.97802218 | -0.22276225 | 3.47683899  |
| C | -2.58784609 | -0.11351594 | 3.74500367  |
| C | -3.85919611 | -0.15928978 | 4.29891722  |
| H | -5.69191521 | -0.28965295 | 1.45675791  |
| H | -1.43992741 | -0.09483986 | 1.93883445  |
| H | -5.96827729 | -0.25824934 | 3.91044724  |
| H | -1.71735184 | -0.06463017 | 4.38493808  |
| H | -3.98030957 | -0.14552410 | 5.37407564  |
| C | -3.41453271 | -0.21488735 | 0.06290757  |
| O | -4.38382811 | -0.27704528 | -0.68483284 |
| C | -2.09392235 | -0.15841694 | -0.49015609 |
| C | -1.00413561 | -0.11292654 | -1.01043109 |
| C | 0.24199792  | -0.06102272 | -1.64543259 |
| C | 1.52209648  | 0.00643461  | -1.11681200 |
| H | 1.76081200  | 0.03029854  | -0.06632783 |

|   |             |             |             |
|---|-------------|-------------|-------------|
| C | 2.41390785  | 0.03579330  | -2.20096333 |
| H | 3.48893412  | 0.08761297  | -2.15483494 |
| C | 1.65579687  | -0.01389915 | -3.35556580 |
| H | 1.95912205  | -0.01151258 | -4.38888735 |
| N | 0.35434793  | -0.07251981 | -3.01469806 |
| H | -0.44977128 | -0.11604589 | -3.63837273 |
| O | -2.27439664 | -0.20666023 | -4.25153172 |
| H | -2.69123869 | -0.39102643 | -3.40541636 |
| H | -2.50754843 | 0.70527120  | -4.43824865 |

**2a**; E\_B2PLYP-D3BJ = -481.53565071948; E\_wB97XD = -481.782716556; ZPE = 0.214254;  
 Qcorr = 0.224940; Hcorr = 0.225884; Gcorr = 0.178668;

|   |             |             |             |
|---|-------------|-------------|-------------|
| C | 0.28832640  | 0.85327981  | -3.44417620 |
| C | -0.99008985 | 0.82629003  | -2.89561547 |
| C | 1.40337768  | 0.83837486  | -2.63229769 |
| C | -1.18831394 | 0.78396046  | -1.52799234 |
| C | 1.21713203  | 0.79574944  | -1.25169199 |
| C | -0.06297779 | 0.76909025  | -0.70897034 |
| H | 2.40136043  | 0.85929338  | -3.05278367 |
| H | -2.18578585 | 0.76322651  | -1.10847683 |
| H | 2.07674190  | 0.78352666  | -0.59443654 |
| H | -0.18625760 | 0.73635218  | 0.36576018  |
| C | 0.13620976  | 0.89684318  | -4.93916415 |
| C | 0.74067353  | -0.33747972 | -5.61773567 |
| C | 0.72028978  | 2.17917674  | -5.54222705 |
| H | 0.27659823  | 3.06628063  | -5.08889864 |
| H | 1.79700952  | 2.20593110  | -5.37153924 |
| H | 0.54347999  | 2.21222347  | -6.61783654 |
| H | 1.81787270  | -0.35667360 | -5.44908826 |
| H | 0.56317869  | -0.30937624 | -6.69337998 |
| H | 0.31207585  | -1.25713146 | -5.21790296 |
| C | -1.38263469 | 0.88718552  | -5.03303926 |
| N | -1.98941172 | 0.84821454  | -3.90091443 |
| C | -2.09361067 | 0.91954736  | -6.33325512 |
| H | -1.80603665 | 0.06008084  | -6.94240889 |
| H | -3.17165701 | 0.91074271  | -6.19038880 |
| H | -1.81379005 | 1.81292855  | -6.89530735 |

**2a'**; E\_B2PLYP-D3BJ = -557.97109021666; E\_wB97XD = -558.244361218; ZPE = 0.238210; Qcorr = 0.252335; Hcorr = 0.253279; Gcorr = 0.196648;

|   |             |             |             |
|---|-------------|-------------|-------------|
| C | -0.80180042 | -0.44855652 | 0.11302305  |
| C | -2.09095800 | -0.46849275 | 0.63382851  |
| C | 0.29230456  | -0.46642399 | 0.95295794  |
| C | -2.32782714 | -0.50605768 | 1.99472704  |
| C | 0.07018894  | -0.50456802 | 2.32831249  |
| C | -1.22282172 | -0.52388059 | 2.84048026  |
| H | 1.30067350  | -0.45114258 | 0.55816555  |
| H | -3.33687329 | -0.52048256 | 2.38562938  |
| H | 0.91311290  | -0.51902088 | 3.00673471  |
| H | -1.37191188 | -0.55301894 | 3.91194368  |
| C | -0.91803067 | -0.40751633 | -1.38624940 |
| C | -0.30542873 | -1.64671364 | -2.04863452 |

|   |             |             |             |
|---|-------------|-------------|-------------|
| C | -0.31517435 | 0.87131513  | -1.97846864 |
| H | -0.76448668 | 1.76108532  | -1.53626780 |
| H | 0.75740789  | 0.89215697  | -1.78351229 |
| H | -0.46831321 | 0.90250472  | -3.05765186 |
| H | 0.76749149  | -1.66958622 | -1.85581020 |
| H | -0.45958430 | -1.61957430 | -3.12780121 |
| H | -0.74711582 | -2.56306468 | -1.65582957 |
| C | -2.43280100 | -0.40985419 | -1.52000413 |
| N | -3.06003220 | -0.44449306 | -0.39896973 |
| C | -3.12451326 | -0.37502834 | -2.82906069 |
| H | -2.83089386 | -1.23610265 | -3.43270543 |
| H | -4.20431216 | -0.37947317 | -2.69840783 |
| H | -2.83233930 | 0.51746437  | -3.38591873 |
| O | -5.85766623 | -0.41418842 | -0.04912332 |
| H | -6.09970645 | 0.51291652  | -0.05214361 |
| H | -4.88460939 | -0.41701630 | -0.17187488 |

A; E\_B2PLYP-D3BJ = -1112.01935430200; E\_wB97XD = -1112.535393960; ZPE = 0.400747; Qcorr = 0.425214; Hcorr = 0.426159; Gcorr = 0.345503;

|   |             |             |             |
|---|-------------|-------------|-------------|
| C | -0.28401159 | -1.76846912 | -2.72373209 |
| C | -1.38399055 | -2.35411730 | -2.09846441 |
| C | 0.31036434  | -2.40144385 | -3.81304531 |
| C | -1.87634925 | -3.56319501 | -2.55572566 |
| C | -0.19629220 | -3.60320906 | -4.27886294 |
| C | -1.28468441 | -4.18676300 | -3.64804915 |
| H | -1.83844011 | -1.86372992 | -1.24847229 |
| H | 1.16616871  | -1.95414577 | -4.30027722 |
| H | -2.72085306 | -4.02323780 | -2.06067530 |
| H | 0.26920811  | -4.09037430 | -5.12520061 |
| H | -1.67104908 | -5.13269620 | -4.00412488 |
| C | 0.22761581  | -0.46976778 | -2.21460418 |
| O | -0.43341000 | 0.24854454  | -1.47467802 |
| C | 1.54633884  | -0.09103742 | -2.62552545 |
| C | 2.66617364  | 0.18954966  | -2.98174325 |
| C | 3.96921168  | 0.45179555  | -3.42223987 |
| C | 4.69042757  | 1.63493076  | -3.47191181 |
| H | 4.33074593  | 2.59837085  | -3.15007831 |
| C | 5.94297574  | 1.32807151  | -4.02820041 |
| H | 6.75296947  | 2.01262518  | -4.21777432 |
| C | 5.95067431  | -0.02870939 | -4.29246214 |
| H | 6.72704015  | -0.65364957 | -4.70125816 |
| N | 4.75840397  | -0.54655048 | -3.93972057 |
| H | 4.49179753  | -1.53874602 | -3.90703565 |
| C | 2.69238715  | -5.28163612 | -3.38479813 |
| C | 3.23771078  | -4.28173664 | -4.18286609 |
| C | 2.10567226  | -6.39117823 | -3.95561093 |
| C | 3.21349375  | -4.35644052 | -5.56227419 |
| C | 2.07040313  | -6.47982865 | -5.34593484 |
| C | 2.61787487  | -5.47536011 | -6.13696815 |
| H | 1.67395817  | -7.17268979 | -3.34259915 |
| H | 3.63536956  | -3.56856666 | -6.17252050 |
| H | 1.60898958  | -7.33788548 | -5.81682650 |

|   |            |             |             |
|---|------------|-------------|-------------|
| H | 2.57706008 | -5.56346151 | -7.21476451 |
| C | 2.88784020 | -4.87464713 | -1.95052347 |
| C | 3.85622741 | -5.82463329 | -1.23046073 |
| C | 1.57863960 | -4.76097646 | -1.16653549 |
| H | 0.89830183 | -4.04633181 | -1.62709043 |
| H | 1.08749048 | -5.73386685 | -1.13145652 |
| H | 1.77634406 | -4.44091885 | -0.14291882 |
| H | 3.41329302 | -6.81953256 | -1.17710800 |
| H | 4.04765224 | -5.47943091 | -0.21405816 |
| H | 4.80648558 | -5.89707384 | -1.76049278 |
| C | 3.54496069 | -3.51975887 | -2.16408254 |
| N | 3.75956462 | -3.22572826 | -3.39728534 |
| C | 3.89311920 | -2.62060889 | -1.03928428 |
| H | 4.46755253 | -3.15719129 | -0.28256560 |
| H | 4.45922594 | -1.75688239 | -1.37886069 |
| H | 2.97619701 | -2.27346716 | -0.55656981 |

A'; E\_B2PLYP-D3BJ = -1188.45194524010; E\_wB97XD = -1188.993922800; ZPE = 0.425365; Qcorr = 0.453345; Hcorr = 0.454289; Gcorr = 0.364344;

|   |             |             |             |
|---|-------------|-------------|-------------|
| C | -0.69637243 | -1.97106720 | -3.43067434 |
| C | -1.50601581 | -2.96895052 | -2.88960812 |
| C | -0.86040162 | -1.59516281 | -4.76126094 |
| C | -2.45904922 | -3.58840985 | -3.67721449 |
| C | -1.82459717 | -2.20753844 | -5.54410675 |
| C | -2.62011262 | -3.20731474 | -5.00418307 |
| H | -1.37644740 | -3.26092665 | -1.85694888 |
| H | -0.23801041 | -0.81709815 | -5.18184927 |
| H | -3.07826178 | -4.37038422 | -3.25888821 |
| H | -1.94844402 | -1.90943874 | -6.57639217 |
| H | -3.36731245 | -3.69328876 | -5.61769085 |
| C | 0.32746312  | -1.32352471 | -2.57319032 |
| O | 0.35983734  | -1.48042531 | -1.35813016 |
| C | 1.30660905  | -0.50123668 | -3.21845236 |
| C | 2.18120155  | 0.14496521  | -3.74568582 |
| C | 3.19957377  | 0.88769218  | -4.35357651 |
| C | 4.28136797  | 1.54539796  | -3.78682286 |
| H | 4.50289255  | 1.58262201  | -2.73296799 |
| C | 5.00318945  | 2.13324855  | -4.83745542 |
| H | 5.90263047  | 2.72068678  | -4.75768977 |
| C | 4.34410626  | 1.81855529  | -6.01054008 |
| H | 4.57572946  | 2.07580132  | -7.03041779 |
| N | 3.26256269  | 1.07270655  | -5.71344177 |
| H | 2.59400873  | 0.67886009  | -6.37630004 |
| C | 1.86112739  | -4.75206357 | -3.63490533 |
| C | 2.69843636  | -3.73690130 | -4.08440527 |
| C | 0.87511653  | -5.26673666 | -4.45169167 |
| C | 2.58505872  | -3.22069553 | -5.36283401 |
| C | 0.74826273  | -4.75376882 | -5.73982845 |
| C | 1.59809582  | -3.74834969 | -6.18939628 |
| H | 0.21455570  | -6.05132473 | -4.10360642 |
| H | 3.24167202  | -2.43233677 | -5.70802051 |
| H | -0.02052119 | -5.13716214 | -6.39767563 |

|   |            |             |             |
|---|------------|-------------|-------------|
| H | 1.48506060 | -3.36950695 | -7.19748386 |
| C | 2.28449354 | -5.09986426 | -2.23501842 |
| C | 2.83786572 | -6.52960126 | -2.15914806 |
| C | 1.16920186 | -4.90818624 | -1.20490349 |
| H | 0.81132641 | -3.87961971 | -1.19651647 |
| H | 0.33233935 | -5.56560076 | -1.44377342 |
| H | 1.52631419 | -5.15971768 | -0.20545725 |
| H | 2.04258425 | -7.24002251 | -2.38726085 |
| H | 3.21065789 | -6.74321604 | -1.15676989 |
| H | 3.64935178 | -6.67823747 | -2.87246333 |
| C | 3.40357372 | -4.08406194 | -2.05747887 |
| N | 3.63060398 | -3.35130626 | -3.08861871 |
| C | 4.16680442 | -3.96170227 | -0.79274447 |
| H | 4.62190555 | -4.91816964 | -0.52776849 |
| H | 4.94399115 | -3.20561317 | -0.87641662 |
| H | 3.49448598 | -3.69337495 | 0.02511593  |
| O | 1.31550253 | -0.22958154 | -7.40219179 |
| H | 0.46599155 | 0.17433644  | -7.21002345 |
| H | 1.29591626 | -1.06308114 | -6.92451725 |

**TS<sub>AB</sub>**; E\_B2PLYP-D3BJ = -1111.98232796550; E\_wB97XD = -1112.496715910; ZPE = 0.400279; Qcorr = 0.424006; Hcorr = 0.424950; Gcorr = 0.346395;  
 \*\*\*imaginary frequency\*\*\* -367.8574 cm<sup>-1</sup>;

|   |             |             |             |
|---|-------------|-------------|-------------|
| C | -0.24247406 | -2.17677778 | -3.32526756 |
| C | -0.82882331 | -3.35930998 | -2.88234891 |
| C | -0.42600929 | -1.76872005 | -4.64337913 |
| C | -1.57782771 | -4.13260274 | -3.75398729 |
| C | -1.19682550 | -2.53075787 | -5.50641006 |
| C | -1.76648932 | -3.71708005 | -5.06541315 |
| H | -0.67450613 | -3.68179376 | -1.86122037 |
| H | 0.03164143  | -0.85176740 | -4.99092033 |
| H | -2.01222107 | -5.06228822 | -3.41122556 |
| H | -1.34581318 | -2.20342463 | -6.52675471 |
| H | -2.35494137 | -4.32010023 | -5.74438922 |
| C | 0.63230523  | -1.41290059 | -2.38663341 |
| O | 0.40808282  | -1.41108719 | -1.16925116 |
| C | 1.73248496  | -0.73745413 | -2.96072048 |
| C | 2.93786699  | -0.93801384 | -3.23838710 |
| C | 4.17584416  | -0.38435449 | -3.69117621 |
| C | 4.74068722  | 0.83778909  | -3.39311528 |
| H | 4.32518324  | 1.56521171  | -2.71532430 |
| C | 5.93906559  | 0.93742134  | -4.13724350 |
| H | 6.63215729  | 1.76243049  | -4.14045655 |
| C | 6.06948773  | -0.22775293 | -4.85421091 |
| H | 6.84002971  | -0.55588474 | -5.53079048 |
| N | 4.99948935  | -1.01638459 | -4.58033520 |
| H | 4.83677509  | -1.93486991 | -4.95737390 |
| C | 2.62111810  | -4.96398163 | -2.75138787 |
| C | 2.78801681  | -3.84481501 | -3.55434874 |
| C | 2.02025450  | -6.09726297 | -3.25997053 |
| C | 2.37765679  | -3.80752477 | -4.87134810 |
| C | 1.59036370  | -6.07807755 | -4.58434790 |

|   |            |             |             |
|---|------------|-------------|-------------|
| C | 1.76769493 | -4.94911411 | -5.37829128 |
| H | 1.87701899 | -6.97718409 | -2.64564177 |
| H | 2.50655485 | -2.91875121 | -5.47461365 |
| H | 1.10744045 | -6.95137310 | -5.00244254 |
| H | 1.41938267 | -4.95667610 | -6.40246870 |
| C | 3.16855329 | -4.64319967 | -1.38632120 |
| C | 4.36116136 | -5.53292343 | -1.01833733 |
| C | 2.08889513 | -4.70856409 | -0.29916830 |
| H | 1.24905845 | -4.05656229 | -0.53965046 |
| H | 1.72319466 | -5.73223079 | -0.21624957 |
| H | 2.50001844 | -4.40972316 | 0.66534177  |
| H | 4.02975256 | -6.56913922 | -0.95046432 |
| H | 4.77332428 | -5.23955597 | -0.05268687 |
| H | 5.14805569 | -5.46874476 | -1.77021754 |
| C | 3.60813822 | -3.20754564 | -1.61133849 |
| N | 3.39958309 | -2.80394538 | -2.81397931 |
| C | 4.16204621 | -2.34330572 | -0.54822791 |
| H | 4.93665725 | -2.87200293 | 0.00782857  |
| H | 4.56815546 | -1.42115756 | -0.95679232 |
| H | 3.36697453 | -2.09700486 | 0.15967517  |

**TS<sub>A'B'</sub>**; E\_B2PLYP-D3BJ = -1188.41872381550; E\_wB97XD = -1188.957993700; ZPE = 0.424367; Qcorr = 0.451501; Hcorr = 0.452446; Gcorr = 0.365401;

\*\*\*imaginary frequency\*\*\* -329.4695 cm<sup>-1</sup>;

|   |             |             |             |
|---|-------------|-------------|-------------|
| C | -0.92582631 | -2.05738123 | -4.08071533 |
| C | -1.57332552 | -3.23602949 | -3.72042162 |
| C | -1.06294832 | -1.56044863 | -5.37376348 |
| C | -2.34330948 | -3.91559028 | -4.64975553 |
| C | -1.85326037 | -2.22911448 | -6.29391397 |
| C | -2.48803652 | -3.41037665 | -5.93507565 |
| H | -1.44944114 | -3.62855014 | -2.71975344 |
| H | -0.55379445 | -0.64849435 | -5.65748869 |
| H | -2.82787338 | -4.84251101 | -4.37337034 |
| H | -1.96686662 | -1.83391276 | -7.29447877 |
| H | -3.09220021 | -3.94089095 | -6.65925524 |
| C | -0.03916704 | -1.39169867 | -3.08472115 |
| O | -0.24559035 | -1.49640115 | -1.87446268 |
| C | 1.07974982  | -0.68065800 | -3.59944087 |
| C | 2.28099089  | -0.81781016 | -3.89564382 |
| C | 3.48901300  | -0.26803286 | -4.43072801 |
| C | 4.78759461  | -0.72733325 | -4.47455860 |
| H | 5.12857966  | -1.67261775 | -4.08971349 |
| C | 5.56116144  | 0.27007045  | -5.11172727 |
| H | 6.61913149  | 0.23538507  | -5.31317935 |
| C | 4.71209325  | 1.30117906  | -5.43426463 |
| H | 4.89920259  | 2.24009298  | -5.92723605 |
| N | 3.46299001  | 0.96865147  | -5.02142931 |
| H | 2.62451435  | 1.53029818  | -5.12348790 |
| C | 1.92108061  | -4.86830874 | -3.46113752 |
| C | 2.13940277  | -3.74335275 | -4.24399288 |
| C | 1.25129135  | -5.95702285 | -3.98131976 |
| C | 1.71178910  | -3.66023070 | -5.55401400 |

|   |            |             |             |
|---|------------|-------------|-------------|
| C | 0.80412857 | -5.88909385 | -5.29827253 |
| C | 1.03240342 | -4.75601324 | -6.07305438 |
| H | 1.06725483 | -6.83898257 | -3.38079165 |
| H | 1.87927506 | -2.76824136 | -6.14262648 |
| H | 0.26699787 | -6.72587898 | -5.72492084 |
| H | 0.66851685 | -4.72353476 | -7.09140187 |
| C | 2.49933669 | -4.60296192 | -2.09724121 |
| C | 3.66105025 | -5.54799789 | -1.76885605 |
| C | 1.43305714 | -4.65679510 | -0.99747488 |
| H | 0.60697807 | -3.98025360 | -1.21661840 |
| H | 1.04151692 | -5.67187686 | -0.92551943 |
| H | 1.86336633 | -4.38546053 | -0.03315182 |
| H | 3.29096562 | -6.57215193 | -1.71892717 |
| H | 4.09960379 | -5.29321699 | -0.80371053 |
| H | 4.43862585 | -5.49691990 | -2.53148266 |
| C | 3.00122839 | -3.18305532 | -2.30107390 |
| N | 2.81012366 | -2.74597233 | -3.49414950 |
| C | 3.60913138 | -2.36902907 | -1.22758181 |
| H | 4.41565216 | -2.92093910 | -0.74277217 |
| H | 3.99227441 | -1.42799564 | -1.61486470 |
| H | 2.85739433 | -2.16115538 | -0.46274927 |
| O | 0.66089955 | 2.06161600  | -5.02412146 |
| H | 0.62327696 | 2.73648902  | -4.34313201 |
| H | 0.57696243 | 1.22649155  | -4.54053905 |

**B**, E\_B2PLYP-D3BJ = -1111.99775568960; E\_wB97XD = -1112.518461660; ZPE = 0.402766;  
 Qcorr = 0.426275; Hcorr = 0.427220; Gcorr = 0.349205;

|   |             |             |             |
|---|-------------|-------------|-------------|
| C | -0.26805383 | -1.96672219 | -3.18546970 |
| C | -0.80215580 | -3.18874147 | -2.78185315 |
| C | -0.49733658 | -1.51759280 | -4.48343466 |
| C | -1.53200964 | -3.96132238 | -3.67109998 |
| C | -1.24819007 | -2.28071968 | -5.36453643 |
| C | -1.75736816 | -3.50816918 | -4.96423749 |
| H | -0.61582068 | -3.54549613 | -1.77719461 |
| H | -0.08706533 | -0.56889005 | -4.80290648 |
| H | -1.92205638 | -4.92032515 | -3.35613486 |
| H | -1.42875814 | -1.92027297 | -6.36873916 |
| H | -2.32936605 | -4.11048042 | -5.65780778 |
| C | 0.64820748  | -1.25034679 | -2.24007774 |
| O | 0.38124399  | -1.22091579 | -1.01745353 |
| C | 1.78367307  | -0.65736850 | -2.81462140 |
| C | 2.94152670  | -1.24708035 | -3.04407570 |
| C | 4.13233957  | -0.70406248 | -3.69399219 |
| C | 4.30981365  | 0.48603947  | -4.36592151 |
| H | 3.54612015  | 1.22864545  | -4.52950745 |
| C | 5.65936229  | 0.53580056  | -4.79349704 |
| H | 6.13275717  | 1.32867497  | -5.34947186 |
| C | 6.26322587  | -0.62289632 | -4.37533684 |
| H | 7.27145231  | -0.98047345 | -4.49575076 |
| N | 5.33154566  | -1.36414546 | -3.71277998 |
| H | 5.50900689  | -2.26017784 | -3.29122927 |
| C | 2.72274099  | -4.90564491 | -2.85830740 |



|   |            |             |             |
|---|------------|-------------|-------------|
| C | 2.66941178 | -3.71403135 | -3.55373559 |
| C | 2.32793160 | -6.07319049 | -3.47985905 |
| C | 2.24409256 | -3.60545590 | -4.85881445 |
| C | 1.88550561 | -5.99863005 | -4.79656161 |
| C | 1.84583910 | -4.78418241 | -5.47593475 |
| H | 2.35275214 | -7.01912927 | -2.95518737 |
| H | 2.20411707 | -2.65255353 | -5.36698149 |
| H | 1.56377042 | -6.89916029 | -5.30211462 |
| H | 1.49421794 | -4.75442849 | -6.49811511 |
| C | 3.21337529 | -4.63059126 | -1.46230224 |
| C | 4.55373289 | -5.32048438 | -1.17709447 |
| C | 2.16772027 | -4.99712855 | -0.39941599 |
| H | 1.22958941 | -4.47035255 | -0.57642044 |
| H | 1.98238602 | -6.06967374 | -0.44423877 |
| H | 2.53372075 | -4.74655762 | 0.59574160  |
| H | 4.41396605 | -6.39854348 | -1.24671025 |
| H | 4.90172966 | -5.07900314 | -0.17339114 |
| H | 5.31229928 | -5.01828746 | -1.89919738 |
| C | 3.38706857 | -3.13381020 | -1.50690430 |
| N | 3.07795458 | -2.66719508 | -2.67587992 |
| C | 3.81712142 | -2.30428361 | -0.37369649 |
| H | 4.70933170 | -2.73940682 | 0.07709628  |
| H | 4.00704239 | -1.27576020 | -0.66647913 |
| H | 3.03224916 | -2.32076768 | 0.38602711  |

C; E\_B2PLYP-D3BJ = -1112.00141144090; E\_wB97XD = -1112.522084410; ZPE = 0.402523; Qcorr = 0.425361; Hcorr = 0.426305; Gcorr = 0.349576;

|   |             |             |             |
|---|-------------|-------------|-------------|
| C | -0.32274145 | -1.98491401 | -3.19624786 |
| C | -0.83278436 | -3.21540087 | -2.78739007 |
| C | -0.56079411 | -1.54543331 | -4.49584883 |
| C | -1.54793084 | -4.00546749 | -3.67323678 |
| C | -1.29736151 | -2.32625954 | -5.37344438 |
| C | -1.78257172 | -3.56171313 | -4.96797583 |
| H | -0.63861254 | -3.56449473 | -1.78147888 |
| H | -0.16851838 | -0.59050980 | -4.81934666 |
| H | -1.91910829 | -4.97067935 | -3.35451886 |
| H | -1.48521976 | -1.97346964 | -6.37902975 |
| H | -2.34302598 | -4.17766070 | -5.65898700 |
| C | 0.57844976  | -1.24640093 | -2.25381222 |
| O | 0.30802268  | -1.21341789 | -1.03291625 |
| C | 1.70788026  | -0.63625645 | -2.82722479 |
| C | 2.87479920  | -1.21601203 | -3.04014131 |
| C | 4.07550050  | -0.66785715 | -3.65438501 |
| C | 5.32860545  | -1.21560456 | -3.82876481 |
| H | 5.63307922  | -2.20181853 | -3.51670154 |
| C | 6.12557364  | -0.24179825 | -4.48460772 |
| H | 7.15907173  | -0.33922222 | -4.77445732 |
| C | 5.33454959  | 0.86050356  | -4.68572035 |
| H | 5.54964173  | 1.80994105  | -5.14565594 |
| N | 4.09821300  | 0.58948262  | -4.18047493 |
| H | 3.30808767  | 1.21222753  | -4.18417201 |
| C | 2.74168421  | -4.87538967 | -2.85947292 |

|   |            |             |             |
|---|------------|-------------|-------------|
| C | 2.64990704 | -3.68402607 | -3.55145706 |
| C | 2.37601213 | -6.05229328 | -3.48144472 |
| C | 2.21420363 | -3.58513383 | -4.85394228 |
| C | 1.92374974 | -5.98755987 | -4.79533545 |
| C | 1.84564469 | -4.77312992 | -5.47151119 |
| H | 2.43177807 | -6.99853073 | -2.95966928 |
| H | 2.14584194 | -2.63283869 | -5.36007599 |
| H | 1.62552896 | -6.89582885 | -5.30147818 |
| H | 1.48824291 | -4.75114338 | -6.49190627 |
| C | 3.23236794 | -4.58909703 | -1.46553380 |
| C | 4.57920756 | -5.26133757 | -1.17411763 |
| C | 2.18806381 | -4.96547873 | -0.40348170 |
| H | 1.24312056 | -4.45274948 | -0.58613314 |
| H | 2.01784036 | -6.04069059 | -0.44414017 |
| H | 2.54716345 | -4.70512246 | 0.59168704  |
| H | 4.45228190 | -6.34143372 | -1.23730519 |
| H | 4.92235606 | -5.01028881 | -0.17102821 |
| H | 5.33615517 | -4.95530049 | -1.89600798 |
| C | 3.37754931 | -3.08877049 | -1.51342781 |
| N | 3.03834730 | -2.62957749 | -2.67545494 |
| C | 3.80448000 | -2.24871451 | -0.38663169 |
| H | 4.71019841 | -2.66528658 | 0.05443983  |
| H | 3.97205250 | -1.21782325 | -0.68474119 |
| H | 3.02915755 | -2.27843654 | 0.38253401  |

C'; E\_B2PLYP-D3BJ = -1188.44050469770; E\_wB97XD = -1188.987126310; ZPE = 0.427041; Qcorr = 0.453625; Hcorr = 0.454569; Gcorr = 0.369200;

|   |             |             |             |
|---|-------------|-------------|-------------|
| C | -1.03438362 | -1.88580381 | -3.98159315 |
| C | -1.55884878 | -3.10856812 | -3.56926662 |
| C | -1.26339901 | -1.44558617 | -5.28265346 |
| C | -2.28207163 | -3.89183219 | -4.45450517 |
| C | -2.00932292 | -2.21865994 | -6.15865605 |
| C | -2.50964634 | -3.44729963 | -5.75020943 |
| H | -1.36975426 | -3.45697025 | -2.56217650 |
| H | -0.85760385 | -0.49674709 | -5.60780011 |
| H | -2.66512667 | -4.85197996 | -4.13477708 |
| H | -2.19176898 | -1.86638267 | -7.16533047 |
| H | -3.07644822 | -4.05806966 | -6.44062916 |
| C | -0.12854281 | -1.15026363 | -3.04392997 |
| O | -0.37977731 | -1.12494008 | -1.82482038 |
| C | 0.99542748  | -0.51760038 | -3.63020616 |
| C | 2.16225958  | -1.10703894 | -3.83168058 |
| C | 3.37292661  | -0.58097312 | -4.44814777 |
| C | 4.62170249  | -1.15258043 | -4.57973247 |
| H | 4.90688149  | -2.13088661 | -4.22697731 |
| C | 5.44397493  | -0.21550896 | -5.25491071 |
| H | 6.48104031  | -0.33760792 | -5.52174678 |
| C | 4.67082943  | 0.88912319  | -5.50987453 |
| H | 4.90852461  | 1.81753850  | -6.00097647 |
| N | 3.42185394  | 0.65730490  | -5.01959704 |
| H | 2.63704124  | 1.29640841  | -5.06661277 |
| C | 2.02871321  | -4.76330717 | -3.61384320 |

|   |            |             |             |
|---|------------|-------------|-------------|
| C | 1.93635570 | -3.57871480 | -4.31714382 |
| C | 1.67147225 | -5.94711697 | -4.22764267 |
| C | 1.50802492 | -3.49265507 | -5.62298950 |
| C | 1.22720486 | -5.89569518 | -5.54481680 |
| C | 1.14803698 | -4.68756191 | -6.23216158 |
| H | 1.72763303 | -6.88845795 | -3.69715699 |
| H | 1.43909373 | -2.54516089 | -6.13802402 |
| H | 0.93595301 | -6.80958016 | -6.04486522 |
| H | 0.79697472 | -4.67607395 | -7.25491144 |
| C | 2.50756999 | -4.46255159 | -2.21885082 |
| C | 3.85613039 | -5.12392192 | -1.91057910 |
| C | 1.45653123 | -4.83631310 | -1.16264544 |
| H | 0.51050871 | -4.32983973 | -1.35665044 |
| H | 1.29202967 | -5.91261075 | -1.19723914 |
| H | 1.80611510 | -4.56731522 | -0.16642038 |
| H | 3.73628426 | -6.20531467 | -1.96429561 |
| H | 4.18971927 | -4.86059239 | -0.90738475 |
| H | 4.61673672 | -4.81999493 | -2.62955793 |
| C | 2.64726678 | -2.96213834 | -2.27878575 |
| N | 2.31438980 | -2.51499453 | -3.44747497 |
| C | 3.07279248 | -2.11188623 | -1.15957466 |
| H | 4.01147006 | -2.49267656 | -0.75543540 |
| H | 3.18711588 | -1.07289435 | -1.45425610 |
| H | 2.32883506 | -2.18246299 | -0.36308677 |
| O | 0.75283696 | 2.09520021  | -4.85164452 |
| H | 0.87132237 | 2.74950035  | -4.16041569 |
| H | 0.72438549 | 1.22871189  | -4.37393088 |

**TS<sub>CD</sub>**; E\_B2PLYP-D3BJ = -1111.96263840720; E\_wB97XD = -1112.482063940; ZPE = 0.397576; Qcorr = 0.420900; Hcorr = 0.421844; Gcorr = 0.342439; \*\*\*imaginary frequency\*\*\* -1766.3307 cm<sup>-1</sup>;

|   |             |             |             |
|---|-------------|-------------|-------------|
| C | -0.57937248 | -1.81068684 | -3.59900391 |
| C | -1.70457337 | -2.55058961 | -3.24301747 |
| C | -0.40064368 | -1.43452260 | -4.92874814 |
| C | -2.63323352 | -2.91480505 | -4.20331584 |
| C | -1.33451057 | -1.79176726 | -5.88770418 |
| C | -2.44987187 | -2.53490595 | -5.52671332 |
| H | -1.84033457 | -2.84925660 | -2.21236091 |
| H | 0.47059952  | -0.85842280 | -5.21175129 |
| H | -3.50018423 | -3.49768673 | -3.92196193 |
| H | -1.19151998 | -1.49206069 | -6.91729594 |
| H | -3.17647150 | -2.81899411 | -6.27658664 |
| C | 0.43957774  | -1.47694713 | -2.55815951 |
| O | 0.16929691  | -1.59846687 | -1.35862676 |
| C | 1.71276684  | -0.98201652 | -3.00489324 |
| C | 2.88134987  | -1.60630496 | -2.99030807 |
| C | 4.00345898  | -0.82894567 | -3.52308943 |
| C | 5.37600904  | -0.90463782 | -3.63446322 |
| H | 6.00711202  | -1.72990800 | -3.34272881 |
| C | 5.77724520  | 0.34182706  | -4.18477222 |
| H | 6.78362529  | 0.64984281  | -4.42597443 |
| C | 4.62616551  | 1.09100274  | -4.36981397 |

|   |            |             |             |
|---|------------|-------------|-------------|
| H | 4.52008040 | 2.08424090  | -4.77764766 |
| N | 3.54948780 | 0.36431002  | -3.97576515 |
| H | 2.31894352 | 0.17116530  | -3.63899605 |
| C | 3.01069715 | -5.23283571 | -2.61824723 |
| C | 2.67001072 | -4.09365645 | -3.32165610 |
| C | 2.70013411 | -6.47144902 | -3.14140287 |
| C | 2.03591313 | -4.10678768 | -4.54368457 |
| C | 2.05175291 | -6.52165852 | -4.37148356 |
| C | 1.72692388 | -5.35828563 | -5.06230297 |
| H | 2.95366174 | -7.37915046 | -2.60994463 |
| H | 1.79032350 | -3.19534279 | -5.06925736 |
| H | 1.79721427 | -7.48146926 | -4.80042564 |
| H | 1.22592742 | -5.42557141 | -6.01826940 |
| C | 3.69556942 | -4.82991083 | -1.34025605 |
| C | 5.14720866 | -5.32510267 | -1.27040161 |
| C | 2.90562694 | -5.27779206 | -0.10189515 |
| H | 1.89164305 | -4.87897785 | -0.11589672 |
| H | 2.85366578 | -6.36585636 | -0.09970968 |
| H | 3.40505699 | -4.95225448 | 0.80961824  |
| H | 5.14442173 | -6.41427078 | -1.25362280 |
| H | 5.62734093 | -4.96256185 | -0.36206291 |
| H | 5.71946312 | -4.98868422 | -2.13453572 |
| C | 3.67256486 | -3.32958504 | -1.45905370 |
| N | 3.09618071 | -2.96324149 | -2.56217321 |
| C | 4.24190413 | -2.39545031 | -0.48085706 |
| H | 5.32314677 | -2.35473721 | -0.63971229 |
| H | 3.83420788 | -1.39372183 | -0.59022056 |
| H | 4.07421174 | -2.76590663 | 0.52880698  |

**TS<sub>CD</sub>**; E\_B2PLYP-D3BJ = -1188.43259350480; E\_wB97XD = -1188.977826450; ZPE = 0.422564; Qcorr = 0.448277; Hcorr = 0.449221; Gcorr = 0.366318;

\*\*\*imaginary frequency\*\*\* -1363.7184 cm<sup>-1</sup>;

|   |             |             |             |
|---|-------------|-------------|-------------|
| C | -1.03501429 | -1.81603058 | -4.03693988 |
| C | -1.59161042 | -3.01014821 | -3.58628680 |
| C | -1.23518252 | -1.41276437 | -5.35471347 |
| C | -2.32553899 | -3.80326589 | -4.45286266 |
| C | -1.99784531 | -2.19149169 | -6.20941246 |
| C | -2.53232555 | -3.39255778 | -5.76323963 |
| H | -1.41956383 | -3.32792967 | -2.56630959 |
| H | -0.79552567 | -0.48968457 | -5.70912501 |
| H | -2.73443506 | -4.74344882 | -4.10761187 |
| H | -2.16269126 | -1.86954012 | -7.22891656 |
| H | -3.10870176 | -4.01127857 | -6.43840767 |
| C | -0.14062053 | -1.05020648 | -3.12319685 |
| O | -0.35407027 | -1.01019464 | -1.91380009 |
| C | 0.99618602  | -0.37686498 | -3.73456513 |
| C | 2.15151068  | -1.00737350 | -3.91237596 |
| C | 3.36856513  | -0.48895717 | -4.51517506 |
| C | 4.60208034  | -1.08559159 | -4.68147471 |
| H | 4.86745950  | -2.08462915 | -4.37390664 |
| C | 5.43499204  | -0.14010726 | -5.32726605 |
| H | 6.46596770  | -0.27283350 | -5.61197738 |

|   |            |             |             |
|---|------------|-------------|-------------|
| C | 4.68056434 | 0.99151442  | -5.52754265 |
| H | 4.93733986 | 1.93383113  | -5.98162631 |
| N | 3.43362940 | 0.77046942  | -5.03588530 |
| H | 2.64101145 | 1.42337920  | -5.01700697 |
| C | 2.02235455 | -4.65440510 | -3.67080789 |
| C | 1.92136010 | -3.47703088 | -4.38463345 |
| C | 1.69363613 | -5.84793635 | -4.28148043 |
| C | 1.51303047 | -3.40580704 | -5.69744914 |
| C | 1.26857903 | -5.81245263 | -5.60538161 |
| C | 1.18076504 | -4.61070529 | -6.30268180 |
| H | 1.75769555 | -6.78451235 | -3.74366989 |
| H | 1.44054844 | -2.46370844 | -6.22166868 |
| H | 0.99979124 | -6.73427755 | -6.10336259 |
| H | 0.84594397 | -4.61200600 | -7.33086722 |
| C | 2.47816491 | -4.33798623 | -2.27188729 |
| C | 3.83356552 | -4.97612914 | -1.94246224 |
| C | 1.42011342 | -4.72077364 | -1.22563572 |
| H | 0.46964173 | -4.22781987 | -1.43179770 |
| H | 1.27081170 | -5.79921442 | -1.25854203 |
| H | 1.75558077 | -4.44341671 | -0.22695618 |
| H | 3.73045941 | -6.05928551 | -1.99336803 |
| H | 4.14867740 | -4.70315702 | -0.93596680 |
| H | 4.59860251 | -4.66328061 | -2.65277316 |
| C | 2.59679483 | -2.83729275 | -2.33738313 |
| N | 2.27032373 | -2.40245160 | -3.51429270 |
| C | 2.99572103 | -1.97399276 | -1.21999085 |
| H | 3.93199799 | -2.34199209 | -0.79896597 |
| H | 3.10204077 | -0.93544483 | -1.51894141 |
| H | 2.23987379 | -2.04969673 | -0.43494184 |
| O | 0.94379008 | 2.04796959  | -4.67496422 |
| H | 1.02923677 | 2.63786020  | -3.92383671 |
| H | 0.89720255 | 0.88083301  | -4.17021697 |

**D**; E\_B2PLYP-D3BJ = -1112.02955619330; E\_wB97XD = -1112.545101630; ZPE = 0.402605; Qcorr = 0.426022; Hcorr = 0.426966; Gcorr = 0.348071;

|   |             |             |             |
|---|-------------|-------------|-------------|
| C | -0.98454511 | -1.92108123 | -3.76706205 |
| C | -2.10237812 | -2.28537590 | -3.01816938 |
| C | -1.16199286 | -1.17713637 | -4.93206324 |
| C | -3.37132026 | -1.90118743 | -3.41664230 |
| C | -2.43475861 | -0.80880424 | -5.34057353 |
| C | -3.54022169 | -1.16411234 | -4.58149390 |
| H | -1.96879967 | -2.86400666 | -2.11411568 |
| H | -0.31169027 | -0.90106155 | -5.54080135 |
| H | -4.23056241 | -2.17744532 | -2.81995705 |
| H | -2.56221959 | -0.24409268 | -6.25452879 |
| H | -4.53221598 | -0.86888148 | -4.89736753 |
| C | 0.36614176  | -2.37989676 | -3.30588688 |
| O | 0.44149276  | -3.41300073 | -2.63190961 |
| C | 1.49717143  | -1.56234297 | -3.67094102 |
| C | 2.80782310  | -1.84242706 | -3.43224582 |
| C | 3.92918324  | -1.04973389 | -3.75915535 |
| C | 5.29113155  | -1.37161072 | -3.54271881 |

|   |            |             |             |
|---|------------|-------------|-------------|
| H | 5.68100014 | -2.27300018 | -3.09374064 |
| C | 6.01211465 | -0.29653664 | -4.02857482 |
| H | 7.08446552 | -0.17452904 | -4.03930022 |
| C | 5.05169918 | 0.61840710  | -4.51374437 |
| H | 5.24903912 | 1.58079007  | -4.96750285 |
| N | 3.80533365 | 0.18067394  | -4.36017162 |
| H | 1.30637174 | -0.62439796 | -4.16754259 |
| C | 3.65259063 | -5.30792377 | -2.69081664 |
| C | 3.27705026 | -4.30605315 | -3.56378996 |
| C | 3.84645569 | -6.58692947 | -3.17159441 |
| C | 3.07728999 | -4.49387024 | -4.91280504 |
| C | 3.65305867 | -6.81436890 | -4.53032433 |
| C | 3.27463045 | -5.78486721 | -5.38696947 |
| H | 4.14039260 | -7.39125724 | -2.51037575 |
| H | 2.78247273 | -3.68411462 | -5.56550763 |
| H | 3.79896023 | -7.80898558 | -4.92956206 |
| H | 3.13106230 | -5.99011606 | -6.43890436 |
| C | 3.77311722 | -4.72951428 | -1.30678907 |
| C | 5.20614210 | -4.81707151 | -0.76183571 |
| C | 2.77644014 | -5.36750119 | -0.32877977 |
| H | 1.75164080 | -5.25879671 | -0.68223016 |
| H | 3.00708362 | -6.42867525 | -0.24403229 |
| H | 2.86487310 | -4.91250555 | 0.65694029  |
| H | 5.47649001 | -5.86733361 | -0.66010644 |
| H | 5.26891820 | -4.34305814 | 0.21705540  |
| H | 5.91395857 | -4.33618482 | -1.43676314 |
| C | 3.41436086 | -3.28924004 | -1.56232465 |
| N | 3.15190492 | -3.10084845 | -2.81572893 |
| C | 3.38365691 | -2.23193750 | -0.54551582 |
| H | 4.41328615 | -2.00660351 | -0.25558642 |
| H | 2.90854445 | -1.32431497 | -0.90693824 |
| H | 2.87092524 | -2.59579581 | 0.34443128  |

**D'**; E\_B2PLYP-D3BJ = -1188.46818971560; E\_wB97XD = -1189.010207930; ZPE = 0.427453; Qcorr = 0.453787; Hcorr = 0.454732; Gcorr = 0.368959;

|   |             |             |             |
|---|-------------|-------------|-------------|
| C | -3.51535888 | 0.85647798  | -1.27748881 |
| C | -4.60294505 | 0.39338236  | -0.53860581 |
| C | -3.73749021 | 1.75152831  | -2.32314166 |
| C | -5.88535289 | 0.82697182  | -0.82794733 |
| C | -5.02420891 | 2.17114491  | -2.62348379 |
| C | -6.09876039 | 1.71559884  | -1.87361692 |
| H | -4.43495165 | -0.30201710 | 0.27253739  |
| H | -2.91394360 | 2.11084961  | -2.92554686 |
| H | -6.72020921 | 0.47181497  | -0.23851036 |
| H | -5.18650662 | 2.85533218  | -3.44561739 |
| H | -7.10152021 | 2.05060072  | -2.10423691 |
| C | -2.14888962 | 0.34649282  | -0.93301215 |
| O | -2.04363666 | -0.75060688 | -0.37826936 |
| C | -1.03112176 | 1.20109532  | -1.26481385 |
| C | 0.28599766  | 0.91725562  | -1.09994507 |
| C | 1.38863629  | 1.73590447  | -1.44060340 |
| C | 2.75531403  | 1.45939711  | -1.21869934 |

|   |             |             |             |
|---|-------------|-------------|-------------|
| H | 3.16778670  | 0.57604192  | -0.75481628 |
| C | 3.44884396  | 2.55300514  | -1.71182492 |
| H | 4.51700616  | 2.70548734  | -1.71777806 |
| C | 2.47023474  | 3.43410946  | -2.20991146 |
| H | 2.63421793  | 4.39424076  | -2.68060849 |
| N | 1.23604144  | 2.95646848  | -2.05240997 |
| H | -0.13665281 | 3.75347612  | -2.88098734 |
| C | 1.23504219  | -2.55627604 | -0.55575961 |
| C | 0.88451586  | -1.50381751 | -1.37862346 |
| C | 1.50058233  | -3.79065041 | -1.11265809 |
| C | 0.77507312  | -1.59787375 | -2.74760528 |
| C | 1.39768887  | -3.92401560 | -2.49372634 |
| C | 1.04121896  | -2.84564367 | -3.29798823 |
| H | 1.77895072  | -4.63252132 | -0.49274122 |
| H | 0.49716597  | -0.75095546 | -3.35947818 |
| H | 1.59784656  | -4.88302975 | -2.95220508 |
| H | 0.96901512  | -2.97826160 | -4.36871406 |
| C | 1.26305092  | -2.07222214 | 0.86893621  |
| C | 2.68255644  | -2.13374496 | 1.45560748  |
| C | 0.26644363  | -2.80987825 | 1.77156158  |
| H | -0.74668221 | -2.74440779 | 1.37678713  |
| H | 0.55548976  | -3.85870514 | 1.82554583  |
| H | 0.28500297  | -2.39103908 | 2.77716261  |
| H | 3.00119033  | -3.17503742 | 1.47903257  |
| H | 2.69344307  | -1.74280286 | 2.47220838  |
| H | 3.38574382  | -1.56584752 | 0.84654094  |
| C | 0.84758497  | -0.63590959 | 0.69600902  |
| N | 0.66660401  | -0.36242917 | -0.55608926 |
| C | 0.61861708  | 0.31768060  | 1.78648635  |
| H | 1.35103925  | 0.16864470  | 2.57745588  |
| H | 0.63465535  | 1.34892304  | 1.44412779  |
| H | -0.36838374 | 0.10086587  | 2.20692293  |
| O | -0.82894539 | 4.22945856  | -3.40137839 |
| H | -1.63505382 | 4.13073215  | -2.89240180 |
| H | -1.24944862 | 2.17279357  | -1.67518471 |

**E**; E\_B2PLYP-D3BJ = -1112.02828102590; E\_wB97XD = -1112.543806900; ZPE = 0.402640;  
 Qcorr = 0.426086; Hcorr = 0.427031; Gcorr = 0.347705;

|   |             |             |             |
|---|-------------|-------------|-------------|
| C | -3.58191744 | 1.17566194  | -3.05094108 |
| C | -4.71381790 | 0.91979411  | -2.27862651 |
| C | -3.72073672 | 1.88563072  | -4.24207956 |
| C | -5.95740799 | 1.37686766  | -2.68015003 |
| C | -4.96928264 | 2.32724765  | -4.65279337 |
| C | -6.08806032 | 2.07937719  | -3.87092770 |
| H | -4.61053297 | 0.36731122  | -1.35444039 |
| H | -2.86093065 | 2.07814334  | -4.86938791 |
| H | -6.82671360 | 1.18383811  | -2.06557995 |
| H | -5.06756013 | 2.86467873  | -5.58657359 |
| H | -7.06056623 | 2.43125909  | -4.18929471 |
| C | -2.26102577 | 0.63969024  | -2.58492281 |
| O | -2.25100298 | -0.37458829 | -1.87843331 |
| C | -1.08239396 | 1.36685321  | -2.98503213 |

|   |             |             |             |
|---|-------------|-------------|-------------|
| C | 0.21162666  | 1.01335452  | -2.74365902 |
| C | 1.37461523  | 1.72668844  | -3.10742170 |
| C | 1.44816848  | 2.97217281  | -3.77427096 |
| H | 0.61795020  | 3.57593096  | -4.10718990 |
| C | 2.79551321  | 3.24928125  | -3.90398450 |
| H | 3.24625405  | 4.11731656  | -4.36100597 |
| C | 3.47214265  | 2.15887227  | -3.31169178 |
| H | 4.54314001  | 2.02963062  | -3.22920127 |
| N | 2.63594015  | 1.24382890  | -2.83319011 |
| H | -1.22597317 | 2.29647797  | -3.51370542 |
| C | 0.82648654  | -2.46961748 | -1.87719094 |
| C | 0.52270432  | -1.47565322 | -2.78665512 |
| C | 0.93359677  | -3.77494590 | -2.31189639 |
| C | 0.31450821  | -1.69713937 | -4.12926601 |
| C | 0.72871690  | -4.03672875 | -3.66292842 |
| C | 0.42439918  | -3.01466047 | -4.55700753 |
| H | 1.16975605  | -4.57366418 | -1.62136095 |
| H | 0.07752629  | -0.89278286 | -4.81161803 |
| H | 0.80716335  | -5.05253312 | -4.02616655 |
| H | 0.27020341  | -3.24661342 | -5.60188152 |
| C | 0.98206546  | -1.85185211 | -0.51371742 |
| C | 2.40469221  | -2.01915992 | 0.03980064  |
| C | -0.05675587 | -2.38547977 | 0.48262457  |
| H | -1.07143978 | -2.22553143 | 0.11971557  |
| H | 0.10454435  | -3.45500108 | 0.61161104  |
| H | 0.05768755  | -1.89742338 | 1.44978096  |
| H | 2.60201212  | -3.08149969 | 0.17794638  |
| H | 2.49843643  | -1.51804842 | 1.00264544  |
| H | 3.14514962  | -1.61104591 | -0.64760049 |
| C | 0.72028620  | -0.40024904 | -0.82260628 |
| N | 0.47434186  | -0.24043066 | -2.08174082 |
| C | 0.74252530  | 0.68924547  | 0.15952670  |
| H | 1.76731106  | 0.81037211  | 0.51854571  |
| H | 0.39277907  | 1.62979509  | -0.25627254 |
| H | 0.13227103  | 0.41207469  | 1.01956442  |

**E'**; E\_B2PLYP-D3BJ = -1188.46808371630; E\_wB97XD = -1189.010618770; ZPE = 0.427194; Qcorr = 0.453533; Hcorr = 0.454477; Gcorr = 0.369270;

|   |             |             |             |
|---|-------------|-------------|-------------|
| C | -3.49361199 | 0.78580631  | -1.36682943 |
| C | -4.58398915 | 0.36864444  | -0.60518243 |
| C | -3.71352164 | 1.59147427  | -2.48250159 |
| C | -5.86784971 | 0.76195749  | -0.94207089 |
| C | -5.00159205 | 1.96801872  | -2.83082065 |
| C | -6.07946595 | 1.56046797  | -2.05845116 |
| H | -4.41747814 | -0.25762212 | 0.26081058  |
| H | -2.88538956 | 1.90934035  | -3.10143253 |
| H | -6.70543220 | 0.44500435  | -0.33495672 |
| H | -5.16267071 | 2.58065979  | -3.70782563 |
| H | -7.08336017 | 1.86253253  | -2.32654468 |
| C | -2.12570843 | 0.31795431  | -0.97165305 |
| O | -2.01640294 | -0.75905212 | -0.37836161 |
| C | -1.01724822 | 1.18281617  | -1.30474039 |



|   |             |             |             |
|---|-------------|-------------|-------------|
| C | 0.30201737  | 0.93130970  | -1.09112910 |
| C | 1.39276951  | 1.77515766  | -1.40907085 |
| C | 1.34633185  | 3.07992772  | -1.94531827 |
| H | 0.45922790  | 3.64332451  | -2.19013148 |
| C | 2.66376918  | 3.48405850  | -2.07606915 |
| H | 3.02570410  | 4.43032694  | -2.44809153 |
| C | 3.44597189  | 2.40511957  | -1.61850083 |
| H | 4.52558156  | 2.34889194  | -1.58079713 |
| N | 2.69735084  | 1.38066668  | -1.21403902 |
| H | 3.64359336  | -0.18043771 | -1.24514704 |
| C | 1.30010086  | -2.50478996 | -0.40701835 |
| C | 0.97351263  | -1.48238693 | -1.27742032 |
| C | 1.65513080  | -3.73778260 | -0.91535907 |
| C | 0.96774952  | -1.60862707 | -2.64780815 |
| C | 1.66173743  | -3.90160426 | -2.29721621 |
| C | 1.32157324  | -2.85528849 | -3.14906233 |
| H | 1.92237730  | -4.55452536 | -0.25814068 |
| H | 0.70927736  | -0.78406050 | -3.29746926 |
| H | 1.93635226  | -4.85939539 | -2.71803930 |
| H | 1.33582330  | -3.01124915 | -4.21894417 |
| C | 1.21323660  | -1.98971553 | 1.00419814  |
| C | 2.57573853  | -2.02265765 | 1.71356996  |
| C | 0.15049945  | -2.72025319 | 1.83665581  |
| H | -0.82412587 | -2.68527993 | 1.35201199  |
| H | 0.45116098  | -3.76136020 | 1.94716637  |
| H | 0.07272338  | -2.27273767 | 2.82698385  |
| H | 2.90902000  | -3.05792938 | 1.77410845  |
| H | 2.48841633  | -1.62586320 | 2.72411705  |
| H | 3.32071550  | -1.44575518 | 1.16674129  |
| C | 0.79250713  | -0.56506506 | 0.76591171  |
| N | 0.68348927  | -0.32721314 | -0.50097773 |
| C | 0.48439679  | 0.41461002  | 1.81342055  |
| H | 1.10812852  | 0.24361826  | 2.68784553  |
| H | 0.59324293  | 1.43812367  | 1.46288825  |
| H | -0.55710553 | 0.25797001  | 2.11159092  |
| O | 4.28403300  | -0.92142446 | -1.34394686 |
| H | 3.77913348  | -1.71149209 | -1.14153400 |
| H | -1.24679502 | 2.13265628  | -1.76231481 |

**TS<sub>EF</sub>**; E\_B2PLYP-D3BJ = -1112.01575315790; E\_wB97XD = -1112.530148560; ZPE = 0.402808; Qcorr = 0.424895; Hcorr = 0.425839; Gcorr = 0.351200;

\*\*\*imaginary frequency\*\*\* -191.2968 cm<sup>-1</sup>;

|   |             |            |             |
|---|-------------|------------|-------------|
| C | -3.26329301 | 2.60225479 | -0.77241085 |
| C | -4.22880448 | 3.09170285 | 0.10581987  |
| C | -3.28079320 | 3.01907868 | -2.10198310 |
| C | -5.18437855 | 3.99235552 | -0.33216013 |
| C | -4.25030582 | 3.90602377 | -2.54436476 |
| C | -5.19862707 | 4.39906872 | -1.66010949 |
| H | -4.21890031 | 2.76897009 | 1.13811702  |
| H | -2.55449460 | 2.63643332 | -2.80604858 |
| H | -5.92015920 | 4.37746457 | 0.36129961  |
| H | -4.26411506 | 4.21201225 | -3.58191981 |

|   |             |             |             |
|---|-------------|-------------|-------------|
| H | -5.94906879 | 5.09817515  | -2.00508339 |
| C | -2.26226586 | 1.61330490  | -0.25855752 |
| O | -2.56516851 | 0.90275729  | 0.70231121  |
| C | -0.97537165 | 1.57135949  | -0.91851398 |
| C | 0.04530463  | 0.73538139  | -0.61516685 |
| C | 1.35795083  | 0.71244097  | -1.17691746 |
| C | 2.01091374  | 1.54307368  | -2.09729118 |
| H | 1.57669764  | 2.36997480  | -2.63751361 |
| C | 3.32751010  | 1.09084586  | -2.14578582 |
| H | 4.12862117  | 1.47784683  | -2.75747870 |
| C | 3.40825595  | 0.00796232  | -1.25223930 |
| H | 4.26912040  | -0.60551078 | -1.02719614 |
| N | 2.22256733  | -0.23077920 | -0.69054937 |
| H | -0.77758464 | 2.29844948  | -1.69182881 |
| C | -0.06951944 | -2.60731062 | 0.61455163  |
| C | -0.68060245 | -1.57008518 | -0.06798652 |
| C | -0.48770064 | -3.90604183 | 0.40766018  |
| C | -1.70312427 | -1.76743252 | -0.97151860 |
| C | -1.52106763 | -4.13512183 | -0.49511995 |
| C | -2.11702622 | -3.07920222 | -1.17498284 |
| H | -0.01794264 | -4.72763846 | 0.93273771  |
| H | -2.16149807 | -0.94631973 | -1.50392456 |
| H | -1.86326437 | -5.14576970 | -0.67272803 |
| H | -2.91643689 | -3.27673136 | -1.87631944 |
| C | 0.99658028  | -2.04866840 | 1.51785578  |
| C | 2.36646999  | -2.70264335 | 1.33753321  |
| C | 0.56148464  | -2.15505744 | 2.99262921  |
| H | -0.38642556 | -1.64576635 | 3.16586154  |
| H | 0.44115937  | -3.20868652 | 3.24121413  |
| H | 1.31982007  | -1.72797793 | 3.64785492  |
| H | 2.31197993  | -3.73572063 | 1.68055222  |
| H | 3.11558491  | -2.18250116 | 1.93470731  |
| H | 2.67439104  | -2.68835640 | 0.29502829  |
| C | 0.98591688  | -0.59230104 | 1.10561189  |
| N | -0.06149898 | -0.34504092 | 0.31467166  |
| C | 1.64531249  | 0.46211893  | 1.90684686  |
| H | 2.66768486  | 0.17533596  | 2.13954352  |
| H | 1.63259428  | 1.42856629  | 1.41231274  |
| H | 1.09329154  | 0.54599996  | 2.84693332  |

**TS<sub>E</sub>** (rotation of C(O)Ph group); E\_B2PLYP-D3BJ = -1111.99300750870; E\_wB97XD = -1112.510921320; ZPE = 0.401800; Qcorr = 0.424533; Hcorr = 0.425477; Gcorr = 0.348614; \*\*\*imaginary frequency\*\*\* -95.7179 cm<sup>-1</sup>;

|   |             |             |             |
|---|-------------|-------------|-------------|
| C | -3.44713574 | 1.26138009  | -1.30777863 |
| C | -4.35729755 | 2.23500601  | -0.90090232 |
| C | -3.86867099 | 0.29949883  | -2.22427189 |
| C | -5.64665516 | 2.26104504  | -1.41044631 |
| C | -5.16138779 | 0.31687402  | -2.72757797 |
| C | -6.05416350 | 1.30061232  | -2.32612830 |
| H | -4.04665630 | 2.98254647  | -0.18281471 |
| H | -3.18737969 | -0.48202832 | -2.53495227 |
| H | -6.33553122 | 3.03248618  | -1.09099496 |

|   |             |             |             |
|---|-------------|-------------|-------------|
| H | -5.47378507 | -0.44490079 | -3.43023225 |
| H | -7.06231537 | 1.31505737  | -2.71927793 |
| C | -2.05279358 | 1.26899786  | -0.73284784 |
| O | -1.92230271 | 1.66466429  | 0.47882709  |
| C | -1.02574423 | 0.87575783  | -1.55460347 |
| C | 0.35105251  | 0.81402753  | -1.07318892 |
| C | 1.25418288  | 1.80257450  | -1.06775150 |
| C | 1.02338509  | 3.17503574  | -1.50291680 |
| H | 0.09181560  | 3.55349471  | -1.89072956 |
| C | 2.18234160  | 3.82546778  | -1.30665092 |
| H | 2.40992107  | 4.86099680  | -1.50367096 |
| C | 3.10831849  | 2.83892649  | -0.76403013 |
| H | 4.14061044  | 3.03142670  | -0.50116164 |
| N | 2.58652101  | 1.66371147  | -0.62009341 |
| C | 1.26573247  | -2.69213537 | -0.63138003 |
| C | 0.92907907  | -1.60763890 | -1.41704448 |
| C | 1.48555010  | -3.91957687 | -1.22283687 |
| C | 0.81083981  | -1.66381595 | -2.78883901 |
| C | 1.35995739  | -4.01528662 | -2.60447511 |
| C | 1.03119296  | -2.90421198 | -3.37475330 |
| H | 1.75182843  | -4.78314438 | -0.62789553 |
| H | 0.56625135  | -0.79584567 | -3.38408892 |
| H | 1.52616469  | -4.96719944 | -3.09047453 |
| H | 0.94785745  | -3.00330248 | -4.44832166 |
| C | 1.34101013  | -2.25194127 | 0.80418737  |
| C | 2.75186168  | -2.42092452 | 1.38635117  |
| C | 0.30098264  | -2.96561919 | 1.67945067  |
| H | -0.70927282 | -2.79988892 | 1.30598477  |
| H | 0.50914122  | -4.03470184 | 1.66242534  |
| H | 0.36291375  | -2.61573699 | 2.70900067  |
| H | 3.00423821  | -3.48054141 | 1.38639970  |
| H | 2.78557431  | -2.05407880 | 2.41151496  |
| H | 3.49013019  | -1.88385109 | 0.79129544  |
| C | 1.00580835  | -0.78701813 | 0.67950590  |
| N | 0.78292844  | -0.47355571 | -0.56057002 |
| C | 0.93831511  | 0.14125822  | 1.81397773  |
| H | 1.94309645  | 0.24770153  | 2.22954342  |
| H | 0.55700916  | 1.11758650  | 1.53526806  |
| H | 0.31426981  | -0.29466367 | 2.59463467  |
| H | -1.21154121 | 0.56881951  | -2.57392669 |

**TS<sub>E</sub>** (rotation of C(O)Ph group); E\_B2PLYP-D3BJ = -1188.43023993050; E\_wB97XD = -1188.974814000; ZPE = 0.427157; Qcorr = 0.452613; Hcorr = 0.453557; Gcorr = 0.371397; \*\*\*imaginary frequency\*\*\* -96.9836 cm<sup>-1</sup>;

|   |             |             |             |
|---|-------------|-------------|-------------|
| C | -3.44267568 | 1.25358909  | -1.27450729 |
| C | -4.35771111 | 2.22161576  | -0.86536093 |
| C | -3.86381926 | 0.28184914  | -2.18066545 |
| C | -5.65201795 | 2.23246127  | -1.36271238 |
| C | -5.16132422 | 0.28412107  | -2.67173460 |
| C | -6.05926492 | 1.26226784  | -2.26814450 |
| H | -4.04708453 | 2.97674417  | -0.15525264 |
| H | -3.17841296 | -0.49546271 | -2.49280223 |

|   |             |             |             |
|---|-------------|-------------|-------------|
| H | -6.34493528 | 2.99960290  | -1.04169568 |
| H | -5.47328045 | -0.48502347 | -3.36650149 |
| H | -7.07115703 | 1.26488793  | -2.65181681 |
| C | -2.04332452 | 1.27712577  | -0.71238347 |
| O | -1.90398422 | 1.68466083  | 0.49357826  |
| C | -1.02056038 | 0.88520842  | -1.54052918 |
| C | 0.36061581  | 0.83153276  | -1.07500983 |
| C | 1.26312462  | 1.82023041  | -1.08700810 |
| C | 1.02604875  | 3.20133000  | -1.48433708 |
| H | 0.08230424  | 3.59171477  | -1.82834200 |
| C | 2.19247637  | 3.84605909  | -1.30806815 |
| H | 2.41493999  | 4.88623619  | -1.48389104 |
| C | 3.13492370  | 2.84756929  | -0.82615813 |
| H | 4.18005319  | 3.02363586  | -0.60637963 |
| N | 2.60898053  | 1.67209560  | -0.68876001 |
| H | 3.65327884  | 0.11464943  | -0.97511010 |
| C | 1.30526189  | -2.66716257 | -0.63474919 |
| C | 0.97577171  | -1.58084593 | -1.42209550 |
| C | 1.57193916  | -3.88252845 | -1.23207640 |
| C | 0.90409943  | -1.62305771 | -2.79728888 |
| C | 1.49897634  | -3.96339705 | -2.61853180 |
| C | 1.17138860  | -2.85152687 | -3.38830372 |
| H | 1.83637055  | -4.74734083 | -0.63823691 |
| H | 0.66212472  | -0.75159456 | -3.38891429 |
| H | 1.70661284  | -4.90478710 | -3.10902375 |
| H | 1.12926873  | -2.94015429 | -4.46512839 |
| C | 1.31266113  | -2.24090616 | 0.80723991  |
| C | 2.65918558  | -2.47289041 | 1.50043556  |
| C | 0.17566981  | -2.92298078 | 1.59013210  |
| H | -0.79385889 | -2.71990698 | 1.13579204  |
| H | 0.34940165  | -3.99816808 | 1.57892303  |
| H | 0.16536323  | -2.58169427 | 2.62425675  |
| H | 2.87151267  | -3.54127891 | 1.50380979  |
| H | 2.61820434  | -2.12382531 | 2.53162039  |
| H | 3.46531511  | -1.95566604 | 0.98187512  |
| C | 1.01479555  | -0.76868998 | 0.67809243  |
| N | 0.80319697  | -0.45325798 | -0.56392077 |
| C | 0.97286569  | 0.16704415  | 1.80726570  |
| H | 2.00041519  | 0.32429184  | 2.14629226  |
| H | 0.53219698  | 1.12333010  | 1.54506607  |
| H | 0.42868963  | -0.28505606 | 2.63571146  |
| O | 4.26607647  | -0.60002625 | -1.23196286 |
| H | 3.72065188  | -1.38733411 | -1.28354573 |
| H | -1.21070155 | 0.56758032  | -2.55603905 |

**TS<sub>EF</sub>**; E\_B2PLYP-D3BJ = -1188.45315393860; E\_wB97XD = -1188.994409930; ZPE = 0.427615; Qcorr = 0.452819; Hcorr = 0.453763; Gcorr = 0.372670; \*\*\*imaginary frequency\*\*\* -208.6989 cm<sup>-1</sup>;

|   |             |            |             |
|---|-------------|------------|-------------|
| C | -3.72847799 | 0.83178462 | -1.76868629 |
| C | -4.95378856 | 0.50010256 | -1.19248630 |
| C | -3.70901521 | 1.61671488 | -2.91994048 |
| C | -6.13667758 | 0.95744973 | -1.74696532 |

|   |             |             |             |
|---|-------------|-------------|-------------|
| C | -4.89541236 | 2.05743033  | -3.48596554 |
| C | -6.10951814 | 1.73519837  | -2.89736851 |
| H | -4.97259191 | -0.10960597 | -0.29932933 |
| H | -2.77088246 | 1.86891434  | -3.39537964 |
| H | -7.08153133 | 0.70716648  | -1.28311776 |
| H | -4.87052876 | 2.65418462  | -4.38795584 |
| H | -7.03413864 | 2.08835666  | -3.33468808 |
| C | -2.47523541 | 0.30090785  | -1.14402763 |
| O | -2.52684935 | -0.74309083 | -0.49245505 |
| C | -1.26474611 | 1.07651952  | -1.32822970 |
| C | -0.04285230 | 0.76531483  | -0.84137717 |
| C | 1.15623513  | 1.54304045  | -0.91519724 |
| C | 1.42556752  | 2.83506895  | -1.37336809 |
| H | 0.73245883  | 3.49999848  | -1.86463823 |
| C | 2.75625166  | 3.08840364  | -1.03612946 |
| H | 3.32160817  | 3.98459238  | -1.24245548 |
| C | 3.22888703  | 1.93772216  | -0.39018307 |
| H | 4.21842606  | 1.75009910  | 0.00111184  |
| N | 2.27495216  | 1.00019883  | -0.33826355 |
| H | 3.05753442  | -0.24582074 | -1.77887535 |
| C | 1.43774559  | -2.42730849 | -0.28930313 |
| C | 0.50987849  | -1.64730332 | -0.95723667 |
| C | 1.86256887  | -3.61692075 | -0.84464195 |
| C | -0.01923066 | -1.99645405 | -2.18141324 |
| C | 1.34221789  | -3.99727829 | -2.07778287 |
| C | 0.41665519  | -3.19501721 | -2.73552025 |
| H | 2.59283027  | -4.23361538 | -0.33704045 |
| H | -0.72929382 | -1.36648648 | -2.69763005 |
| H | 1.66498393  | -4.92376825 | -2.53311692 |
| H | 0.02852140  | -3.50339143 | -3.69682495 |
| C | 1.82531107  | -1.74951710 | 0.99670515  |
| C | 3.33453056  | -1.58999489 | 1.17877942  |
| C | 1.23269832  | -2.50271076 | 2.20392537  |
| H | 0.14798688  | -2.58078385 | 2.13122218  |
| H | 1.65356682  | -3.50711291 | 2.22311407  |
| H | 1.49182401  | -1.99922356 | 3.13462032  |
| H | 3.77900839  | -2.57546641 | 1.31705435  |
| H | 3.54879306  | -0.99087863 | 2.06388109  |
| H | 3.78680195  | -1.11492918 | 0.31164585  |
| C | 1.11050761  | -0.42372852 | 0.84728952  |
| N | 0.27015406  | -0.46877917 | -0.19342695 |
| C | 0.91658481  | 0.50062568  | 1.98629038  |
| H | 1.86018026  | 0.66975351  | 2.49875069  |
| H | 0.48302684  | 1.44867214  | 1.68267384  |
| H | 0.23142541  | 0.01338815  | 2.68513231  |
| O | 3.43978076  | -0.71525081 | -2.53488766 |
| H | 2.93174249  | -1.52763900 | -2.59059669 |
| H | -1.33982340 | 2.01733482  | -1.85258658 |

F; E\_B2PLYP-D3BJ = -1112.05502967320; E\_wB97XD = -1112.576645380; ZPE = 0.405781;  
 Qcorr = 0.427560; Hcorr = 0.428505; Gcorr = 0.354775;  
 C -3.28888725 2.60837820 -1.20588009

|   |             |             |             |
|---|-------------|-------------|-------------|
| C | -4.28739733 | 3.37041726  | -0.60301105 |
| C | -3.23230625 | 2.54198219  | -2.59617820 |
| C | -5.20481140 | 4.06337731  | -1.37489210 |
| C | -4.15973232 | 3.22374625  | -3.36906826 |
| C | -5.14397240 | 3.98924431  | -2.76036021 |
| H | -4.33595433 | 3.42286426  | 0.47629404  |
| H | -2.47423119 | 1.94068115  | -3.08035823 |
| H | -5.96929548 | 4.66138036  | -0.89668107 |
| H | -4.11429931 | 3.15557824  | -4.44789134 |
| H | -5.86407647 | 4.52593734  | -3.36407226 |
| C | -2.32805218 | 1.84896614  | -0.34000803 |
| O | -2.67199420 | 1.55418512  | 0.81328606  |
| C | -1.02656108 | 1.58628112  | -0.88048406 |
| C | -0.01935100 | 0.86473807  | -0.29670002 |
| C | 1.38651711  | 1.10408409  | -0.52523404 |
| C | 2.26596117  | 1.94231315  | -1.17707009 |
| H | 2.01289315  | 2.73140621  | -1.86509414 |
| C | 3.55676227  | 1.55255612  | -0.75584406 |
| H | 4.49216834  | 1.98080415  | -1.07716108 |
| C | 3.42352426  | 0.51133204  | 0.14688301  |
| H | 4.16317032  | -0.04825300 | 0.69387105  |
| N | 2.10447716  | 0.24804502  | 0.25387402  |
| H | -0.71293805 | 2.20502717  | -1.70962013 |
| C | -0.14964001 | -2.45508819 | 0.80042506  |
| C | -0.92248807 | -1.31329610 | 0.58792405  |
| C | -0.74329606 | -3.69640228 | 0.87160007  |
| C | -2.28725917 | -1.40393211 | 0.38444403  |
| C | -2.12206716 | -3.79942729 | 0.70435505  |
| C | -2.87490922 | -2.66573220 | 0.44660803  |
| H | -0.14102501 | -4.58162435 | 1.03212708  |
| H | -2.89284522 | -0.53402204 | 0.20288702  |
| H | -2.60226320 | -4.76716936 | 0.76015706  |
| H | -3.94316630 | -2.75157221 | 0.29750602  |
| C | 1.32638710  | -2.12180616 | 0.77371106  |
| C | 1.84068614  | -2.38148118 | -0.64890905 |
| C | 2.16265316  | -2.91820622 | 1.76634614  |
| H | 1.77182813  | -2.85660322 | 2.78051921  |
| H | 2.17013216  | -3.96792531 | 1.47197312  |
| H | 3.19486124  | -2.56535519 | 1.76643513  |
| H | 1.70565313  | -3.43613526 | -0.88856307 |
| H | 2.90180122  | -2.14403316 | -0.72820806 |
| H | 1.29608310  | -1.79357714 | -1.38905510 |
| C | 1.26344709  | -0.59207905 | 1.07670808  |
| N | -0.08421401 | -0.17550501 | 0.59567205  |
| C | 1.42877111  | -0.23265602 | 2.54244920  |
| H | 2.44302019  | -0.45475003 | 2.87087422  |
| H | 1.23824410  | 0.83117106  | 2.67621620  |
| H | 0.72776606  | -0.79957006 | 3.15315624  |

**F'**; E\_B2PLYP-D3BJ = -1188.48670819090; E\_wB97XD = -1189.035185520; ZPE = 0.429964; Qcorr = 0.455357; Hcorr = 0.456301; Gcorr = 0.374470;

|   |             |            |             |
|---|-------------|------------|-------------|
| C | -3.77673334 | 0.86460428 | -1.93304872 |
|---|-------------|------------|-------------|

|   |             |             |             |
|---|-------------|-------------|-------------|
| C | -5.07070535 | 0.70768236  | -1.43992668 |
| C | -3.59058522 | 1.45537749  | -3.18092853 |
| C | -6.15888513 | 1.14620372  | -2.17449684 |
| C | -4.68236284 | 1.87652785  | -3.92466793 |
| C | -5.96634320 | 1.72881447  | -3.42059937 |
| H | -5.21721108 | 0.24692796  | -0.47227746 |
| H | -2.59546556 | 1.56824898  | -3.58965560 |
| H | -7.15883778 | 1.03255415  | -1.77735026 |
| H | -4.52910906 | 2.32055567  | -4.89920305 |
| H | -6.81708130 | 2.06548697  | -3.99839416 |
| C | -2.62817414 | 0.34754553  | -1.12263654 |
| O | -2.82155554 | -0.58033138 | -0.33661360 |
| C | -1.35257780 | 1.01465979  | -1.28650182 |
| C | -0.19069299 | 0.70453962  | -0.66583679 |
| C | 0.99328403  | 1.52134845  | -0.64739358 |
| C | 1.48089221  | 2.74430806  | -1.05239848 |
| H | 0.97924963  | 3.45814558  | -1.68416776 |
| C | 2.76589720  | 2.85870890  | -0.48047307 |
| H | 3.45508503  | 3.67783259  | -0.60711410 |
| C | 3.00996182  | 1.71993373  | 0.26464185  |
| H | 3.86334555  | 1.45106256  | 0.86171987  |
| N | 1.94459526  | 0.89768575  | 0.11545983  |
| H | 2.52764548  | -0.02549070 | -2.13066163 |
| C | 1.48213434  | -2.29755865 | -0.28448117 |
| C | 0.31521119  | -1.65817101 | -0.67712599 |
| C | 1.88553999  | -3.46148896 | -0.90856662 |
| C | -0.46032929 | -2.15699750 | -1.71046834 |
| C | 1.11474244  | -3.98036298 | -1.94346315 |
| C | -0.04385151 | -3.32651738 | -2.33757791 |
| H | 2.79976509  | -3.95476932 | -0.60323235 |
| H | -1.35605030 | -1.65850122 | -2.04321029 |
| H | 1.42190354  | -4.88802436 | -2.44527488 |
| H | -0.63729623 | -3.72533783 | -3.14969390 |
| C | 2.15454922  | -1.56334005 | 0.84790969  |
| C | 3.65034161  | -1.37087439 | 0.61282353  |
| C | 1.96040610  | -2.37251509 | 2.13778984  |
| H | 0.90705194  | -2.55742966 | 2.34721409  |
| H | 2.45330093  | -3.33747023 | 2.01797499  |
| H | 2.40696672  | -1.86845552 | 2.99471437  |
| H | 4.13766638  | -2.34581537 | 0.60019937  |
| H | 4.09692217  | -0.78787034 | 1.41929750  |
| H | 3.85690588  | -0.87872863 | -0.33634202 |
| C | 1.35099337  | -0.21929455 | 0.87352231  |
| N | 0.12469744  | -0.45916889 | 0.06189040  |
| C | 1.00980646  | 0.30880537  | 2.25706099  |
| H | 1.92946672  | 0.50503136  | 2.80843745  |
| H | 0.45494447  | 1.24245637  | 2.16441270  |
| H | 0.40609351  | -0.40133889 | 2.81480573  |
| O | 2.62116965  | -0.47560123 | -2.97456657 |
| H | 2.24321306  | -1.34412535 | -2.81407341 |
| H | -1.33925285 | 1.92740207  | -1.86434903 |

**TS<sub>F3a</sub>**; E\_B2PLYP-D3BJ = -1112.02765936350; E\_wB97XD = -1112.548976560; ZPE = 0.404076; Qcorr = 0.425570; Hcorr = 0.426514; Gcorr = 0.353497;  
\*\*\*imaginary frequency\*\*\* -148.9563 cm<sup>-1</sup>;

|   |             |             |             |
|---|-------------|-------------|-------------|
| C | -3.95374093 | 2.75554524  | -1.93307894 |
| C | -4.36195025 | 4.08319458  | -1.82411353 |
| C | -4.64963459 | 1.91312075  | -2.79825814 |
| C | -5.42360811 | 4.56352777  | -2.57577764 |
| C | -5.71863289 | 2.38892270  | -3.54332464 |
| C | -6.10671762 | 3.71722229  | -3.43835893 |
| H | -3.83651245 | 4.74585375  | -1.14918166 |
| H | -4.36730733 | 0.87134189  | -2.87841744 |
| H | -5.71919118 | 5.60103214  | -2.48719530 |
| H | -6.25392489 | 1.71789752  | -4.20268626 |
| H | -6.93978644 | 4.08893470  | -4.02058401 |
| C | -2.79715943 | 2.26847521  | -1.10041288 |
| O | -2.62846092 | 2.80316512  | 0.05160020  |
| C | -1.99275428 | 1.29111927  | -1.62663213 |
| C | -0.89395580 | 0.75518515  | -0.84603464 |
| C | 0.45142899  | 1.19410130  | -0.78778971 |
| C | 1.31840558  | 2.18716951  | -1.21292097 |
| H | 1.06223408  | 3.04715013  | -1.80849132 |
| C | 2.57931506  | 1.83920847  | -0.71013184 |
| H | 3.49962187  | 2.38049283  | -0.85408890 |
| C | 2.45659996  | 0.65144567  | 0.00851664  |
| H | 3.19668802  | 0.07208146  | 0.53461021  |
| N | 1.17446364  | 0.27394597  | -0.06344082 |
| H | -2.14957917 | 0.85528560  | -2.60289422 |
| C | -1.01912596 | -2.59133769 | -0.04303653 |
| C | -1.81980018 | -1.45927290 | -0.14520888 |
| C | -1.61027361 | -3.83776911 | -0.05632739 |
| C | -3.19181903 | -1.51009723 | -0.26452566 |
| C | -2.99478162 | -3.91963359 | -0.18067903 |
| C | -3.77270012 | -2.77347187 | -0.28636185 |
| H | -1.00999616 | -4.73478891 | 0.02102348  |
| H | -3.78563941 | -0.60995380 | -0.32725196 |
| H | -3.47241046 | -4.89015624 | -0.19246985 |
| H | -4.84691864 | -2.86056618 | -0.37644971 |
| C | 0.45398584  | -2.21112529 | -0.00031545 |
| C | 1.01586939  | -2.23708133 | -1.42599874 |
| C | 1.29661010  | -3.09644116 | 0.90478665  |
| H | 0.87242103  | -3.18966490 | 1.90287638  |
| H | 1.36429308  | -4.09445836 | 0.47175152  |
| H | 2.30860337  | -2.69816485 | 0.98866317  |
| H | 0.95010658  | -3.25221743 | -1.81618128 |
| H | 2.06291611  | -1.93312115 | -1.43036183 |
| H | 0.45974611  | -1.58151634 | -2.09751547 |
| C | 0.31774168  | -0.73805633 | 0.51156924  |
| N | -0.97466705 | -0.32773701 | -0.08744619 |
| C | 0.27932980  | -0.59784185 | 2.02276927  |
| H | 1.26951332  | -0.80578636 | 2.42466696  |
| H | -0.00413114 | 0.41950000  | 2.28699405  |
| H | -0.43388308 | -1.29560022 | 2.45714318  |



**3a**; E\_B2PLYP-D3BJ = -1112.06181082590; E\_wB97XD = -1112.583696180; ZPE = 0.406190; Qcorr = 0.427942; Hcorr = 0.428886; Gcorr = 0.355463;

|   |             |             |             |
|---|-------------|-------------|-------------|
| C | -0.93853432 | 4.68396285  | 1.39486245  |
| C | -1.06682674 | 5.82127450  | 0.59979039  |
| C | -1.85181343 | 4.47531380  | 2.42661877  |
| C | -2.09398401 | 6.72374576  | 0.81986432  |
| C | -2.86977817 | 5.38797093  | 2.65828354  |
| C | -2.99726644 | 6.50999313  | 1.85246151  |
| H | -0.35874903 | 5.98947370  | -0.20043253 |
| H | -1.76313987 | 3.61188947  | 3.07199764  |
| H | -2.18985492 | 7.59563306  | 0.18630626  |
| H | -3.56416949 | 5.22165030  | 3.47115253  |
| H | -3.79682350 | 7.21731970  | 2.02945704  |
| C | 0.20361403  | 3.74499954  | 1.12057780  |
| O | 1.22856002  | 4.20308847  | 0.60080289  |
| C | 0.01472483  | 2.37067811  | 1.46864852  |
| C | 0.91606579  | 1.35972012  | 1.27674853  |
| C | 2.24592315  | 1.34334616  | 0.70243920  |
| C | 3.27968979  | 2.12251798  | 0.21306297  |
| H | 3.29591989  | 3.19398398  | 0.15445069  |
| C | 4.29827032  | 1.23245509  | -0.18529859 |
| H | 5.24841629  | 1.50067166  | -0.61738847 |
| C | 3.86986282  | -0.05787487 | 0.06860299  |
| H | 4.34881184  | -1.00838008 | -0.09570976 |
| N | 2.63561781  | 0.03373270  | 0.59762905  |
| H | -0.93729022 | 2.09862331  | 1.89117567  |
| C | -0.50276227 | -1.69367725 | 0.64812057  |
| C | -0.61495860 | -0.60710036 | 1.51178977  |
| C | -1.58705025 | -2.51695209 | 0.43045007  |
| C | -1.78981245 | -0.32696345 | 2.18179115  |
| C | -2.78595597 | -2.23860388 | 1.08341877  |
| C | -2.88310593 | -1.15628307 | 1.94525649  |
| H | -1.51024670 | -3.36290987 | -0.24070897 |
| H | -1.86241366 | 0.48901917  | 2.88622062  |
| H | -3.64532796 | -2.87581129 | 0.92284914  |
| H | -3.81562709 | -0.95815066 | 2.45666248  |
| C | 0.88049441  | -1.73225340 | 0.02706186  |
| C | 0.83381502  | -0.99364856 | -1.31612041 |
| C | 1.42824981  | -3.13638711 | -0.18270287 |
| H | 1.37981546  | -3.73915026 | 0.72258038  |
| H | 0.84810231  | -3.64217277 | -0.95499268 |
| H | 2.46530236  | -3.09354760 | -0.51927913 |
| H | 0.15938390  | -1.52206584 | -1.98986181 |
| H | 1.82280543  | -0.96147308 | -1.77466089 |
| H | 0.46694597  | 0.02798953  | -1.20903522 |
| C | 1.66059923  | -0.89725101 | 1.10120863  |
| N | 0.63673589  | 0.04721155  | 1.60503910  |
| C | 2.24161869  | -1.72990924 | 2.22862967  |
| H | 3.05075080  | -2.35441502 | 1.85305616  |
| H | 2.63403438  | -1.07139373 | 3.00157656  |
| H | 1.47755326  | -2.37312885 | 2.66273916  |

## 7. References

1. S. Sajjadifar H. Vahedi, A. Massoudi, O. Louie, New 3*H*-Indole Synthesis by Fischer's Method. Part I. *Molecules*. 2010; **15**, 2491-2498. [doi.org/10.3390/molecules15042491](https://doi.org/10.3390/molecules15042491)
2. O. Ivashenko, J. T. van Herpt, P. Rudolf, B. L. Feringa, W. R. Browne, *Chem. Commun.*, 2013, **49**, 6737-6739.
3. G. Szalóki, L. Sanguinet, Silica-Mediated Synthesis of Indolinoxazolidine-Based Molecular Switches, *J. Org. Chem.*, 2015, **80**, 3949-3956.
4. G. M. Shivashimpi, S. S. Pandey, R. Watanabe, N. Fujikawa, Y. Ogomi, Y. Yamaguchi, S. Hayase, Effect of nature of anchoring groups on photosensitization behavior in unsymmetrical squaraine dyes, *J. Photochem. Photobiol. A*, 2014, **273**, 1-7. [Doi.org/10.1016/j.jphotochem.2013.09.004](https://doi.org/10.1016/j.jphotochem.2013.09.004)
5. E. Deniz, M. Tomasulo, S. Sortino, F. M. Raymo, Substituent Effects on the Photochromism of Bichromophoric Oxazines. *J. Phys. Chem. C*, 2009, **113**, 8491-8497.
6. B. A. Trofimov, Z. V. Stepanova, L. N. Sobenina, A. I. Mikhaleva, I. A. Ushakov, Ethynylation of Pyrroles with 1-Acyl-2-Bromoacetylenes on Alumina: a Formally "Inverse Sonogashira Coupling", *Tetrahedron Lett.*, 2004, **45**, 6513-6516.
7. M. J. Frisch, W. Trucks, H. B. Schlegel, G. E. Scuseria, M. A. Robb, J. R. Cheeseman, G. Scalmani, V. Barone, B. Mennucci, G. A. Petersson, H. Nakatsuji, M. Caricato, X. Li, H. P. Hratchian, A. F. Izmaylov, J. Bloino, G. Zheng, J. L. Sonnenberg, M. Hada, M. Ehara, K. Toyota, R. Fukuda, J. Hasegawa, M. Ishida, T. Nakajima, Y. Honda, O. Kitao, H. Nakai, T. Vreven, J. A. Montgomery, J. E. Peralta, F. Ogliaro, M. Bearpark, J. J. Heyd, E. Brothers, K. N. Kudin, V. N. Staroverov, R. Kobayashi, J. Normand, K. Raghavachari, A. Rendell, J. C. Burant, S. S. Iyengar, J. Tomasi, M. Cossi, N. Rega, J. M. Millam, M. Klene, J. E. Knox, J. B. Cross, V. Bakken, C. Adamo, J. Jaramillo, R. Gomperts, R. E. Stratmann, O. Yazyev, A. J. Austin, R. Cammi, C. Pomelli, J. W. Ochterski, R. L. Martin, K. Morokuma, V. G. Zakrzewski, G. A. Voth, P. Salvador, J. J. Dannenberg, S. Dapprich, A. D. Daniels, O. Farkas, J. B. Foresman, J. V. Ortiz, J. Cioslowski, D. J. Fox. Gaussian 09, Revision C. 01; Gaussian, Inc.: Wallingford, CT, 2009.
8. M. Bursch, J.-M. Mewes, A. Hansen, S. Grimme. Best-Practice DFT Protocols for Basic Molecular Computational Chemistry. *Angew. Chem. Int. Ed.* 2022, **61**, e202205735.
9. J.-D. Chai, M. Head-Gordon. Long-range corrected hybrid density functionals with damped atom-atom dispersion corrections. *Phys. Chem. Chem. Phys.* 2008, **10**, 6615-6620.
10. S. Grimme, S. Ehrlich, L. Goerigk. Effect of the Damping Function in Dispersion Corrected Density Functional Theory. *J. Comput. Chem.* 2011, **32**, 1456-1465.
11. A. V. Marenich, C. J. Cramer, D. G. Truhlar. Universal solvation model based on solute electron density and a continuum model of the solvent defined by the bulk dielectric constant and atomic surface tensions. *J. Phys. Chem. B*, 2009, **113**, 6378-6396.
12. H. P. Hratchian and H. B. Schlegel. Accurate reaction paths using a Hessian based predictor-corrector integrator. *J. Chem. Phys.* 2004, **120**, 9918-9924.
13. Chemcraft - Graphical Software for Visualization of Quantum Chemistry Computations. <https://www.chemcraftprog.com> (accessed: August 16, 2023).
14. A. V. Marenich, S. V. Jerome, C. J. Cramer, D. G. Truhlar. Charge Model 5: An Extension of Hirshfeld Population Analysis for the Accurate Description of Molecular Interactions in Gaseous and Condensed Phases. *J. Chem. Theory Comput.* 2012, **8**, 527-541.
15. T. Lu, F. Chen. A Multifunctional Wavefunction Analyzer. *J. Comput. Chem.* 2012, **33**, 580-592.
